# Supplementary material for: One-pot synthesis of multi-substituted conjugated dienones by trapping allene carbocations with active ylides
Source: Royal Society of Chemistry journal article supplement (doi:10.1039/d1cc06405c), 2022-01-01
Supplement: d1cc06405c1.pdf [file d1cc06405c1.pdf]

Electronic Supplementary Material (ESI) for Chemical Communications. This journal is © The Royal Society of Chemistry 2021

## **One-pot Synthesis of Multi-substituted Conjugated Dienones by Trapping Allene Carbocation with Active Ylides**

Dan Ni, Longlong Song, Yun Zhao and Shunying Liu \*

Shanghai Engineering Research Center of Molecular Therapeutics and New Drug Development,

School of Chemistry and Chemical Engineering, East China Normal University, 3663 North

Zhongshan Road, Shanghai 200062, China

[syliu@sist.ecnu.edu.cn](mailto:syliu@sist.ecnu.edu.cn).

### **Table of Contents**

|                                               |    |
|-----------------------------------------------|----|
| 1. General Information.....                   | 2  |
| 2. General Procedures.....                    | 3  |
| 3. Reaction Optimization.....                 | 4  |
| 4. Control experiments.....                   | 10 |
| 5. References.....                            | 13 |
| 6. X-ray Diffraction Parameters and Data..... | 14 |
| 7. Characterization Data.....                 | 17 |
| 8. NMR Spectra.....                           | 35 |

## 1. General Information

All  $^1\text{H}$  NMR (400 MHz) and  $^{13}\text{C}$  NMR (100 MHz) and  $^{19}\text{F}$  NMR (376 MHz) spectra were recorded on Bruker spectrometers in  $\text{CDCl}_3$ . Tetramethylsilane (TMS) served as an internal standard ( $\delta = 0$ ) for  $^1\text{H}$  NMR, and  $\text{CDCl}_3$  was used as internal standard ( $\delta = 77.0$ ) for  $^{13}\text{C}$  NMR. Chemical shifts are reported in parts per million as follows: chemical shift, multiplicity (s = singlet, d = doublet, t = triplet, q = quartet, m = multiplet, br = broad). High-resolution mass spectrometry (HRMS) was performed on IonSpec FT-ICR or Waters Micromass Q-TOF micro Synapt High Definition Mass Spectrometer. Yields for all compounds were combined yields for all isomers unless otherwise indicated. All reactions and manipulations were carried out under an  $\text{N}_2$  atmosphere. All commercial anhydrous solvents were purchased from Alfa Aesar and used as such unless stated otherwise. 4 Å molecular sieves was dried in a Muffle furnace at 260 °C for 5 h.

## 2. General Procedure

### General procedure for the preparation of phenyl diazoester.<sup>1</sup>

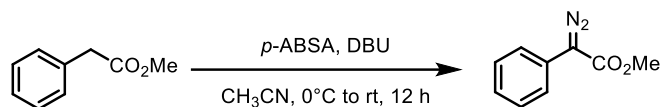

To a mixture of methyl phenylacetate (20 mmol) and tosyl azide (30 mmol) in anhydrous MeCN (15 mL), 1,8-diazabicyclo[5.4.0]undec-7-ene (DBU) (30 mmol) was added slowly. The reaction mixture was stirred at room temperature for 12 h. Upon complete consumption of the starting materials, the reaction mixture was quenched with saturated aqueous solution of NH<sub>4</sub>Cl (5 mL), extracted with CH<sub>2</sub>Cl<sub>2</sub> (3 × 30 mL), washed by brine. The combined extracts were dried with Na<sub>2</sub>SO<sub>4</sub> and concentrated. The residue was purified by flash chromatography (PE/EA, 50 :1) to afford the phenyl diazoester (3.1 g, 88% yield).

### General procedure for the preparation of $\alpha$ -diazo ketone.<sup>2</sup>

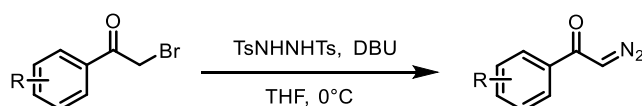

To a mixture of 2-bromoacetophenones (5 mmol, 1.0 equiv) and *N,N*-ditosylhydrazine (5.5 mmol, 1.1 equiv) in THF (30 mL) under N<sub>2</sub>. This suspension was cooled to 0°C and DBU (7.5 mmol, 1.5 equiv) was added dropwise. After 30 minutes, the reaction mixture was poured into saturated aqueous sodium hydrogen carbonate solution, extracted with EA. The combined extracts were combined, washed with brine, dried with Na<sub>2</sub>SO<sub>4</sub> and concentrated, then purified by flash chromatography to afford  $\alpha$ -diazo ketones.

### General procedure for Propargylic alcohols.<sup>3</sup>

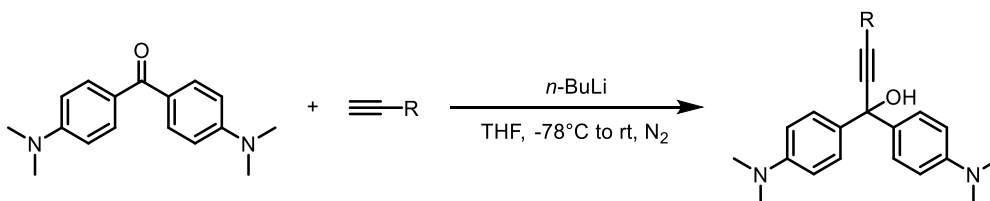

To the mixture of corresponding terminal alkyne1 (10 mmol) in THF (15 mL), *n*-BuLi (13 mmol, 6 mL, 2.5M in hexanes) was added dropwise at -78 °C. After 30 minutes, aromatic benzophenone (8 mmol) in THF (20 mL) was added at the same temperature and the mixture was slowly warmed to

room temperature stirred for 16 h. Checking the consumption of raw material, the reaction mixture was quenched with saturated aqueous solution of NH<sub>4</sub>Cl (4 mL), extracted with EA (3 × 30 mL). The combined extracts were washed with brine, dried with Na<sub>2</sub>SO<sub>4</sub>. After evaporation of the solvent under the reduced pressure, the residue was resolved in DCM and PE by stirred it at 25 °C for 3 h after being filtered to give the propargylic alcohols.

### 3. Optimization of the reaction conditions

(a) Table S1. Screen of reaction with phenyl diazoester.

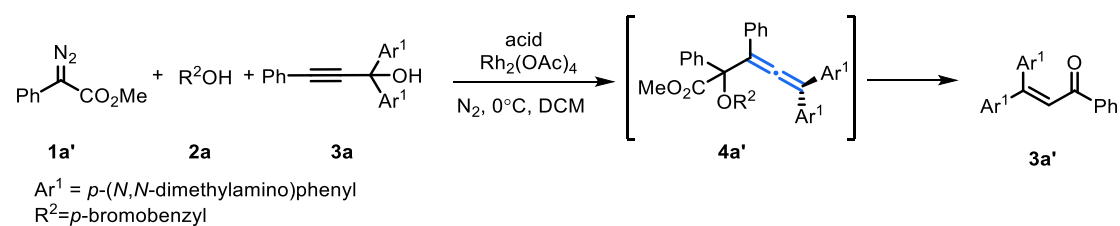

| entry           | acid                            | acid (xmol%) | <b>4a'</b> conv. (%) | <b>4a'</b> yield (%) | <b>3a'</b> yield (%) <sup>d</sup> |
|-----------------|---------------------------------|--------------|----------------------|----------------------|-----------------------------------|
| 1               | Sc(OTf) <sub>3</sub>            | 10           | <10                  | <10                  | –                                 |
| 2               | TsOH                            | 10           | <10                  | <10                  | –                                 |
| 3               | rac-PA                          | 10           | 14                   | <10                  | –                                 |
| 4               | <i>p</i> -FPhB(OH) <sub>2</sub> | 10           | 20                   | <10                  | –                                 |
| 5               | <i>p</i> -FPhB(OH) <sub>2</sub> | 50           | 36                   | <10                  | –                                 |
| 6               | <i>p</i> -FPhB(OH) <sub>2</sub> | 80           | 48                   | <10                  | –                                 |
| 7               | <i>p</i> -FPhB(OH) <sub>2</sub> | 100          | 62                   | <10                  | –                                 |
| 8               | <i>p</i> -FPhB(OH) <sub>2</sub> | 120          | 71                   | <10                  | –                                 |
| 9               | <i>p</i> -FPhB(OH) <sub>2</sub> | 150          | 77                   | <10                  | –                                 |
| 10              | <i>p</i> -FPhB(OH) <sub>2</sub> | 180          | 77                   | <10                  | –                                 |
| 11 <sup>c</sup> | <i>p</i> -FPhB(OH) <sub>2</sub> | 150          | 80                   | <10                  | 72                                |

<sup>a</sup> The reaction was carried out on a 0.2 mmol scale. To a mixture of propargylic alcohols **3a** (0.2 mmol) and benzyl alcohols **2a** (0.3 mmol) in 1.5 mL of solvent and phenyl diazoester **1a** (0.3 mmol) in 1.5 mL of solvent was added via a syringe pump at room temperature stirred for 4 h. <sup>b</sup>Used 1 mol% catalyst. <sup>c</sup>Used 4Å molecular sieves as additive.

<sup>d</sup>**3a'** convert from the decomposition of **4a'** during the process of column chromatography.

**(b) Table S2. Screen the scope of propargylic alcohol.**

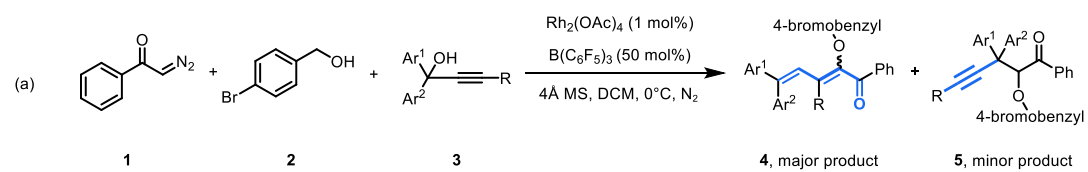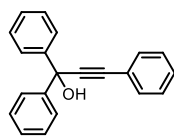

3a

trace

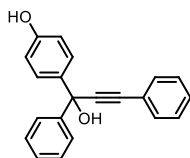

3b

<10% yield

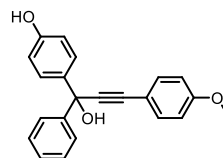

3c

<10% yield

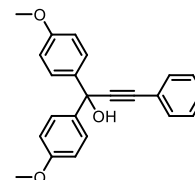

3d

<10% yield

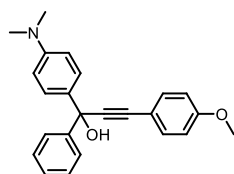

3e

<20% yield

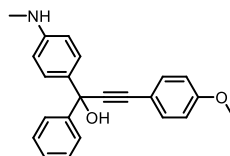

3f

trace

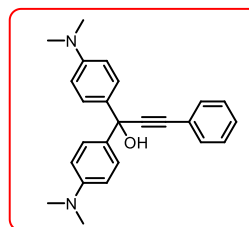

3g

82% yield of 4, ~10% yield of 5

(c) Table S3. Screen of reaction with  $\alpha$ -diazo ketone.

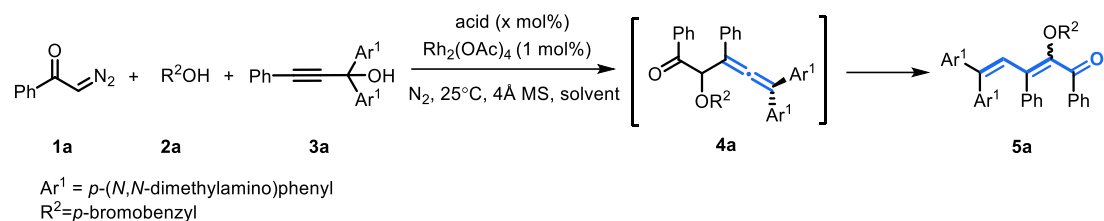

| entry | acid                                           | acid (x mol%) | 4a yield (%) | 5a yield (%) <sup>b</sup> |
|-------|------------------------------------------------|---------------|--------------|---------------------------|
| 1     | Sc(OTf) <sub>3</sub>                           | 50            | <10          | <10                       |
| 2     | Zn(OTf) <sub>2</sub>                           | 50            | <10          | <10                       |
| 3     | Yb(OTf) <sub>3</sub>                           | 50            | <10          | <10                       |
| 4     | proline                                        | 50            | N.R.         | N.R.                      |
| 5     | TsOH                                           | 50            | <10          | <10                       |
| 6     | L-tartaric acid                                | 50            | <10          | 27                        |
| 7     | rac-PA                                         | 50            | <10          | 18                        |
| 8     | PhB(OH) <sub>2</sub>                           | 50            | <10          | 30                        |
| 9     | <i>p</i> -FPhB(OH) <sub>2</sub>                | 50            | <10          | 33                        |
| 10    | <i>p</i> -FPhB(OH) <sub>2</sub>                | 150           | <10          | 58                        |
| 11    | B(C <sub>6</sub> F <sub>5</sub> ) <sub>3</sub> | 50            | <10          | 66                        |
| 12    | B(C <sub>6</sub> F <sub>5</sub> ) <sub>3</sub> | 20            | <10          | 29                        |
| 13    | B(C <sub>6</sub> F <sub>5</sub> ) <sub>3</sub> | 40            | <10          | 50                        |
| 14    | B(C <sub>6</sub> F <sub>5</sub> ) <sub>3</sub> | 60            | <10          | 65                        |

<sup>a</sup> The reaction was carried out on a 0.2 mmol scale. To a mixture of propargylic alcohols **3a** (0.2 mmol) and benzyl alcohols **2a** (0.3 mmol) in 1.5 mL of solvent and  $\alpha$ -diazo ketone **1a** (0.3 mmol) in 1.5 mL of solvent was added *via* a syringe pump at room temperature stirred for 4 h. The solvent is anhydrous, and 4Å molecular sieve was used as an additive. <sup>b</sup> **4a** is not stable and the yield was determined by LC-MS.

(d) Table S3. Screen of reaction with  $\alpha$ -diazo ketone.

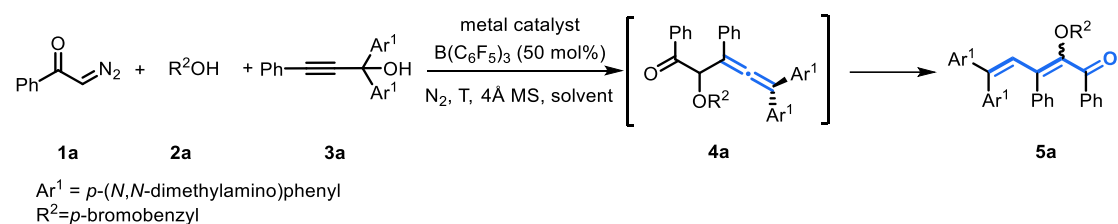

| entry | metal catalyst                     | T (°C) | solvent | 4a yield (%) | 5a yield (%) |
|-------|------------------------------------|--------|---------|--------------|--------------|
| 1     | Rh <sub>2</sub> (OAc) <sub>4</sub> | 25     | DCM     | <10          | 66           |
| 2     | Rh <sub>2</sub> (OAc) <sub>4</sub> | 10     | DCM     | <10          | 73           |
| 3     | Rh <sub>2</sub> (OAc) <sub>4</sub> | 0      | DCM     | <10          | 82           |
| 4     | Rh <sub>2</sub> (OAc) <sub>4</sub> | -10    | DCM     | <10          | 79           |
| 5     | Rh <sub>2</sub> (OAc) <sub>4</sub> | 0      | DCE     | <10          | 74           |
| 6     | Rh <sub>2</sub> (OAc) <sub>4</sub> | 0      | THF     | <10          | 51           |
| 7     | Rh <sub>2</sub> (OAc) <sub>4</sub> | 0      | Toluene | <10          | 43           |
| 8     | [Rh(COD)Cl] <sub>2</sub>           | 0      | DCM     | trace        | trace        |
| 9     | [Pd(allyl)Cl] <sub>2</sub>         | 0      | DCM     | <10          | 34           |
| 10    | Rh <sub>2</sub> (esp) <sub>2</sub> | 0      | DCM     | <10          | 80           |

<sup>a</sup> The reaction was carried out on a 0.2 mmol scale. To a mixture of propargylic alcohols **3a** (0.2 mmol) and benzyl alcohols **2a** (0.3 mmol) in 1.5 mL of solvent and  $\alpha$ -diazo ketones **1a** (0.3 mmol) in 1.5 mL of solvent was added *via* a syringe pump stirred for 4 h. <sup>b</sup> Used 1 mol % catalyst.

**(e) Table S4. Test the effect of water on the reaction.**

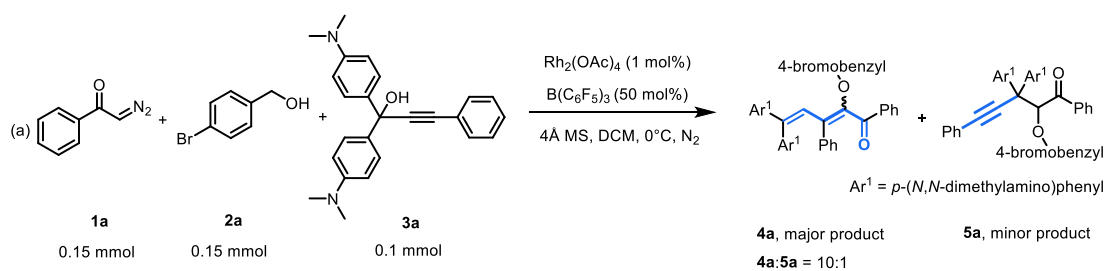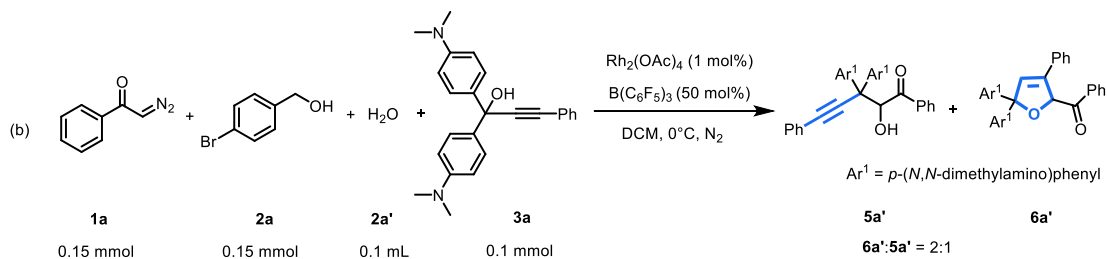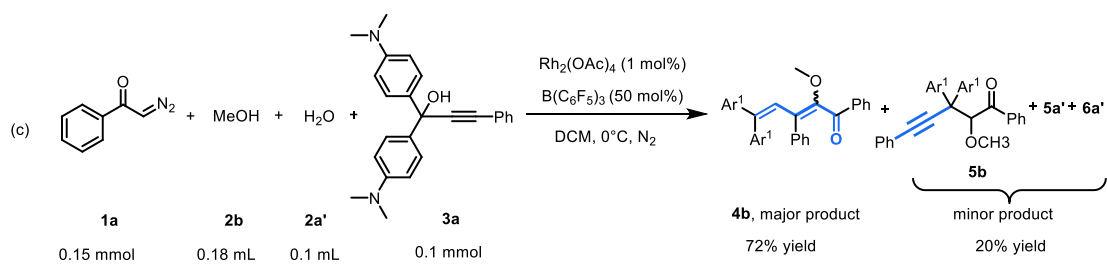



**(f) Table S5. Screen of reaction with water.**

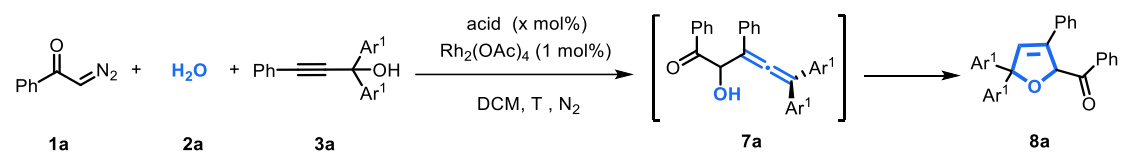

$\text{Ar}^1 = p\text{-(N,N-dimethylamino)phenyl}$

| entry | acid (x mol%)                           | T (°C) | <b>7a</b> yield (%) | <b>8a</b> yield (%) |
|-------|-----------------------------------------|--------|---------------------|---------------------|
| 1     | rac-PA (50)                             | 0      | <10                 | 22                  |
| 2     | $\text{B}(\text{C}_6\text{F}_5)_3$ (50) | 0      | <10                 | 77                  |
| 3     | $\text{PhB}(\text{OH})_2$ (150)         | 0      | <10                 | 83                  |
| 4     | <i>p</i> -FPhB(OH) <sub>2</sub> (150)   | 0      | <10                 | 91                  |
| 5     | <i>p</i> -FPhB(OH) <sub>2</sub> (150)   | -10    | <10                 | 74                  |
| 6     | <i>p</i> -FPhB(OH) <sub>2</sub> (150)   | 10     | <10                 | 82                  |
| 7     | <i>p</i> -FPhB(OH) <sub>2</sub> (150)   | 25     | <10                 | 75                  |

<sup>a</sup>The reaction was carried out on a 0.2 mmol scale. To a mixture of propargyl alcohols **3a** (0.2 mmol) and benzyl alcohols **2a** (0.3 mmol) in 1.5 mL of solvent and  $\alpha$ -diazo ketones **1a** (0.3 mmol) in 1 mL of solvent was added *via* a syringe pump stirred for 4 h.

## 4.1 Control experiment

### Scheme S1.

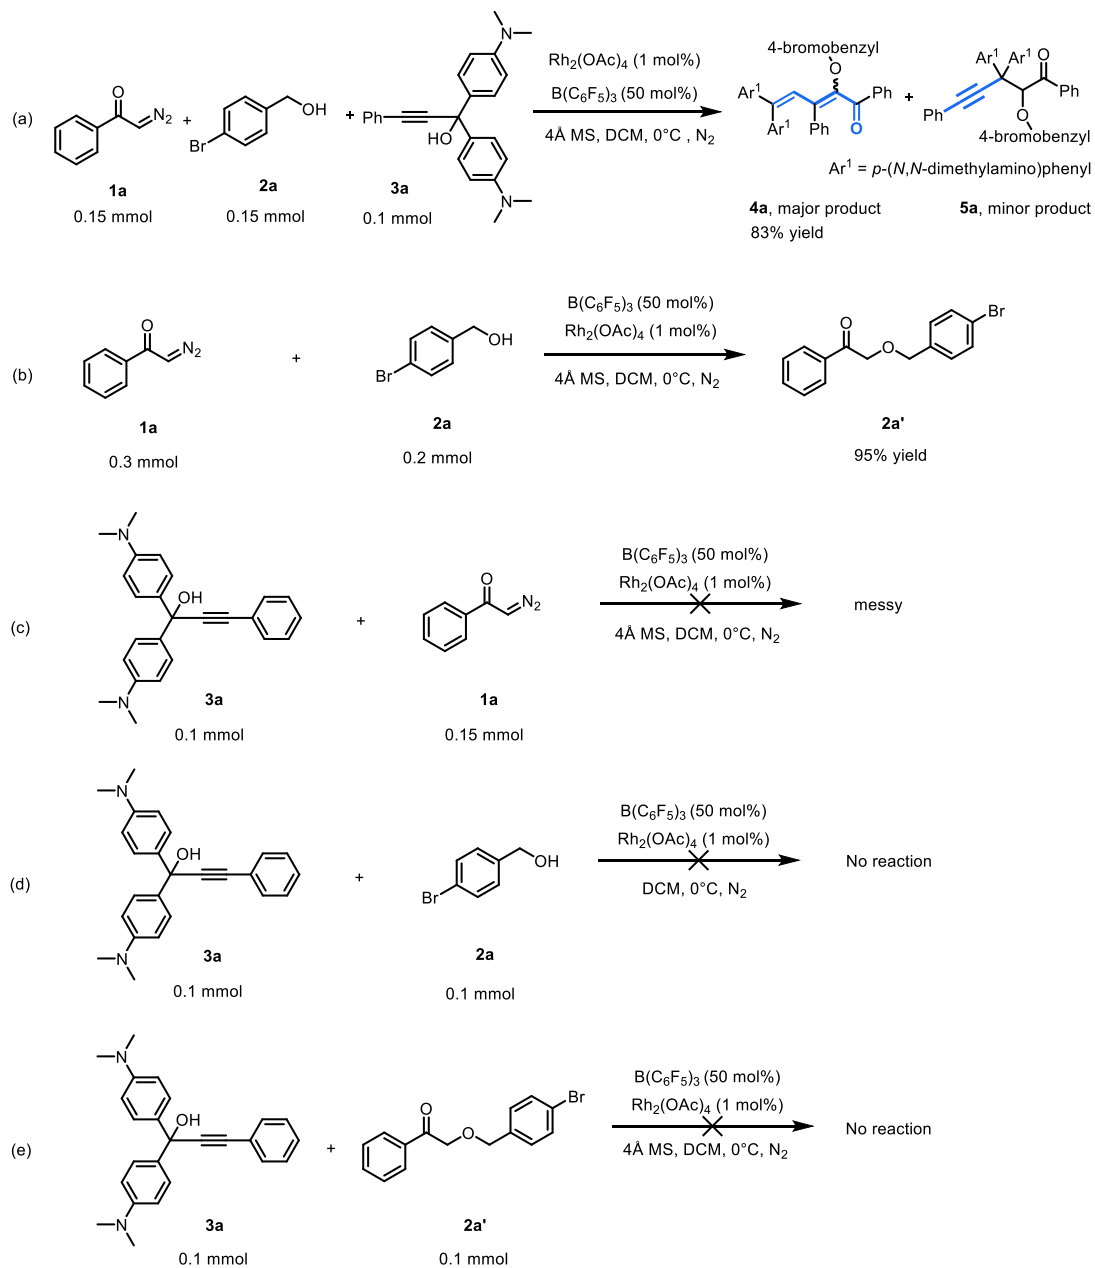

## Scheme S2.

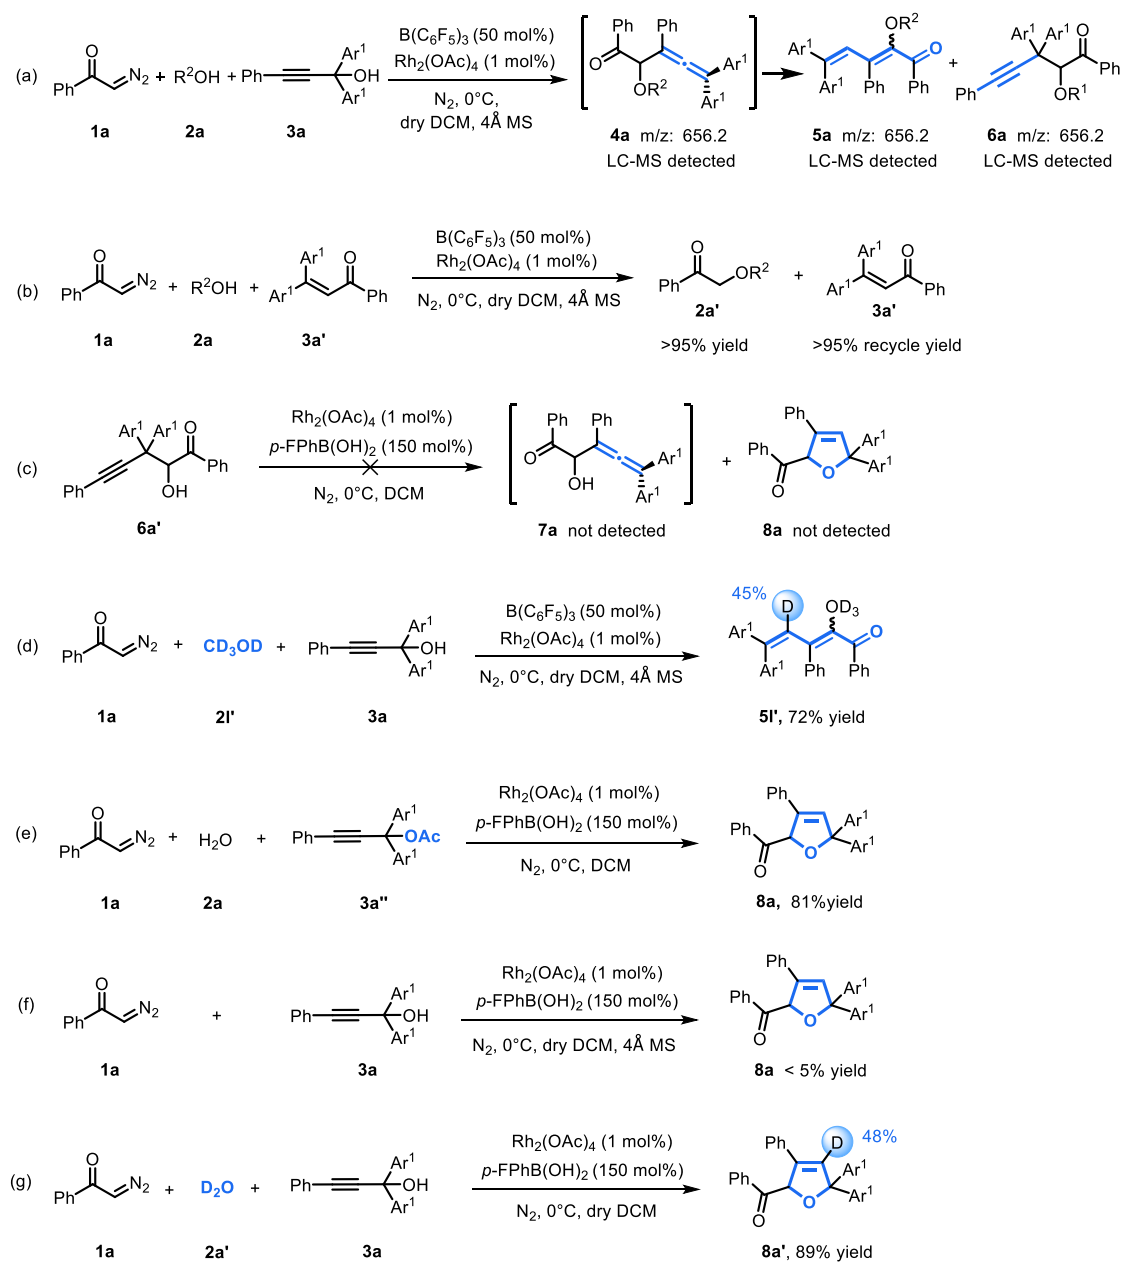

Ar<sup>1</sup> = *p*-(*N,N*-dimethylamino)phenyl; R<sup>2</sup> = *p*-bromobenzyl

## 4.2 Figure S1.

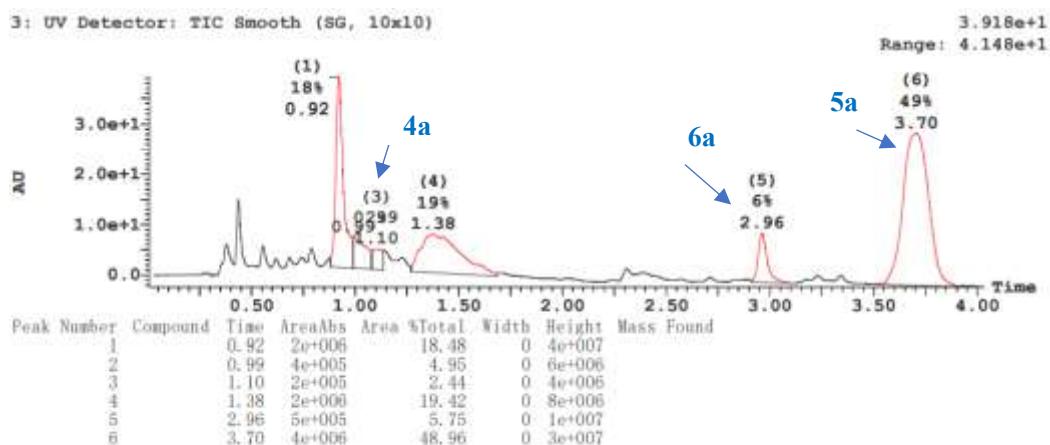

## 4.3 Figure S2.

LC-MS spectra of CD<sub>3</sub>OD experiment.

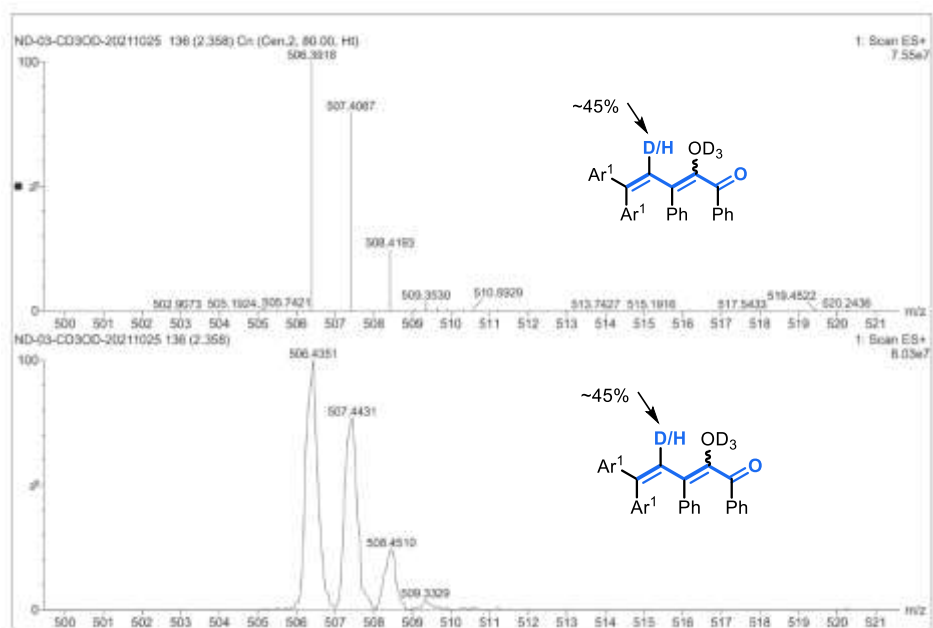

LC-MS spectra of CD<sub>3</sub>OH experiment.

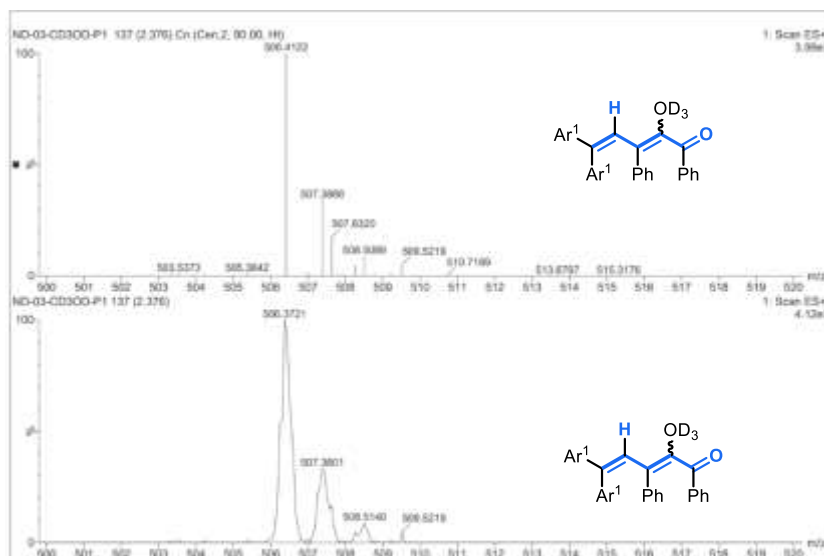

#### 4.4 Figure S3.

<sup>1</sup>H NMR spectra of D<sub>2</sub>O experiment.

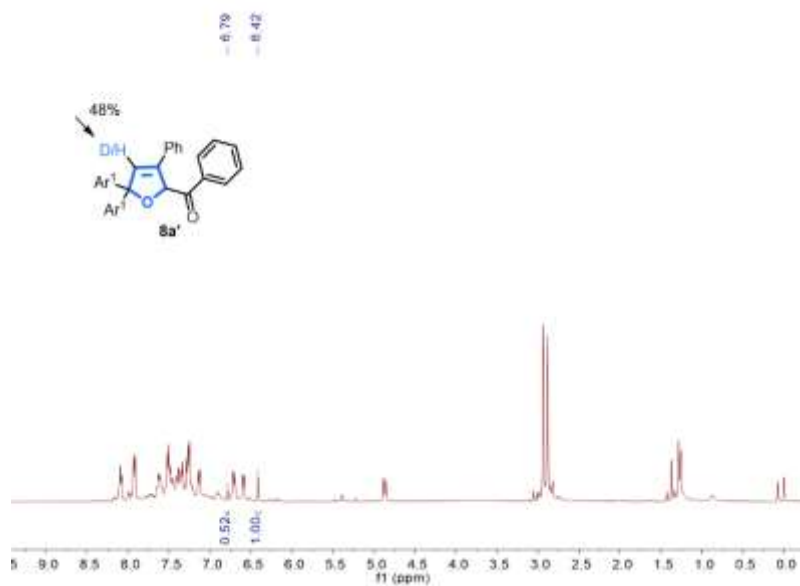

#### 5. References.

- (1) H. Keipour, A. Jalba, L. Delage-Laurin and T. Ollevier, *J. Org. Chem.* 2017, **82**, 3000–3010.
- (2) Z. L. Xia, J. D. Hu, Y. Q. Gao, Q. Z. Yao and W. Q. Xie, *Chem. Commun.* 2017, **53**, 7485–7488.
- (3) H. Zhang, H. Tanimoto, T. Morimoto, Y. Nishiyama and K. Kakiuchi, *Org. Lett.* 2013, **15**, 5222–5225.

## 6. X-ray Diffraction Parameters and Data

Figure S4.

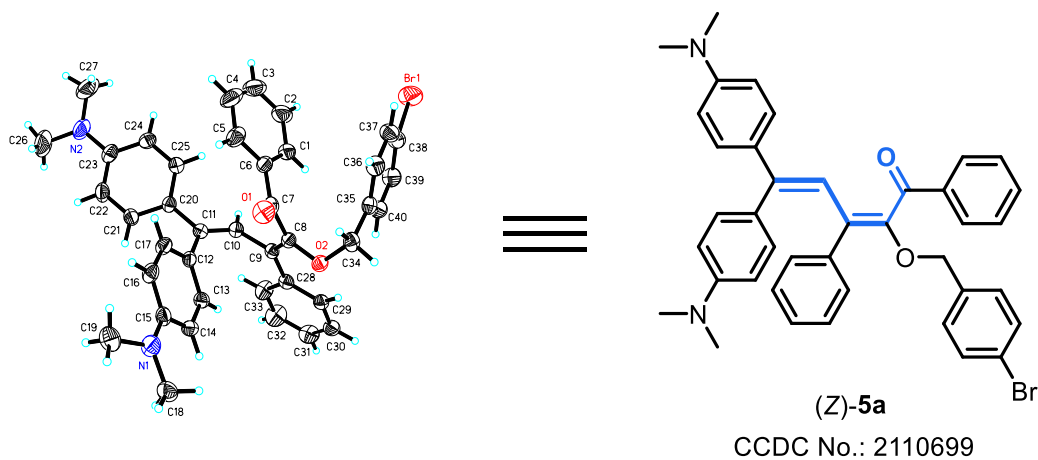

|                 |                                                 |                    |
|-----------------|-------------------------------------------------|--------------------|
| Bond precision: | C-C = 0.0044 Å                                  | Wavelength=0.71073 |
| Cell:           | a=9.9024(2)      b=10.9990(3)      c=16.8991(5) | gamma=104.848(1)   |
|                 | alpha=107.609(1)      beta=96.177(1)            |                    |

Temperature: 293 K

|                | Calculated       | Reported         |
|----------------|------------------|------------------|
| Volume         | 1661.18(8)       | 1661.18(8)       |
| Space group    | P -1             | P -1             |
| Hall group     | -P 1             | -P 1             |
| Moiety formula | C40 H37 Br N2 O2 | C40 H37 Br N2 O2 |
| Sum formula    | C40 H37 Br N2 O2 | C40 H37 Br N2 O2 |
| Mr             | 657.62           | 657.62           |
| Dx,g cm-3      | 1.315            | 1.315            |
| Z              | 2                | 2                |
| Mu (mm-1)      | 1.275            | 1.275            |
| F000           | 684.0            | 684.0            |
| F000'          | 683.66           |                  |
| h,k,lmax       | 12,13,20         | 12,13,20         |
| Nref           | 6541             | 6520             |
| Tmin,Tmax      | 0.858,0.926      | 0.607,0.746      |
| Tmin'          | 0.858            |                  |

Correction method= # Reported T Limits: Tmin=0.607 Tmax=0.746 AbsCorr = MULTI-SCAN

|                               |                                 |
|-------------------------------|---------------------------------|
| Data completeness= 0.997      | Theta(max)= 25.999              |
| R(reflections)= 0.0456( 4465) | wR2(reflections)= 0.1191( 6520) |
| S = 1.013                     | Npar= 410                       |

**Figure S5.**

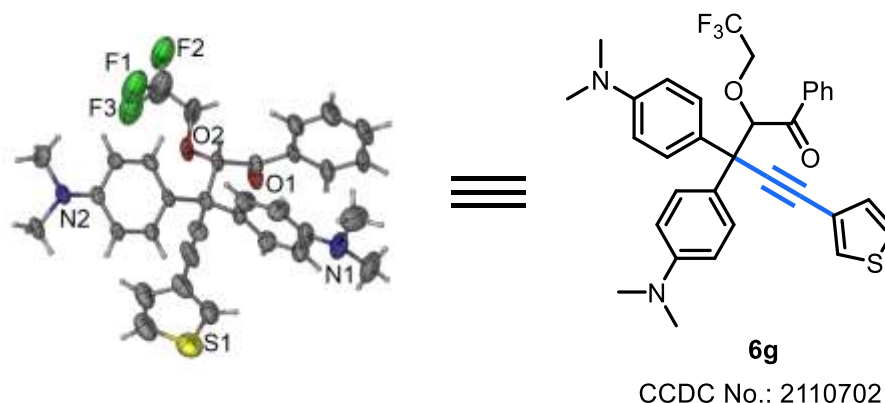

|                        |                                                                                                                                                                            |                                                                                                                                                                          |
|------------------------|----------------------------------------------------------------------------------------------------------------------------------------------------------------------------|--------------------------------------------------------------------------------------------------------------------------------------------------------------------------|
| Bond precision:        | C-C = 0.0086 Å                                                                                                                                                             | Wavelength=1.54184                                                                                                                                                       |
| Cell:                  | a=22.6154(10)      b=11.0222(3)      c=25.2859(12)                                                                                                                         |                                                                                                                                                                          |
|                        | alpha=90              beta=109.234(5)      gamma=90                                                                                                                        |                                                                                                                                                                          |
| Temperature:           | 173 K                                                                                                                                                                      |                                                                                                                                                                          |
|                        | Calculated                                                                                                                                                                 | Reported                                                                                                                                                                 |
| Volume                 | 5951.2(5)                                                                                                                                                                  | 5951.2(5)                                                                                                                                                                |
| Space group            | P 21/n                                                                                                                                                                     | P 1 21/n 1                                                                                                                                                               |
| Hall group             | -P 2yn                                                                                                                                                                     | -P 2yn                                                                                                                                                                   |
| Moiety formula         | C <sub>33</sub> H <sub>28</sub> F <sub>3</sub> N <sub>2</sub> O <sub>2</sub> S, C <sub>33</sub> H <sub>30</sub> F <sub>3</sub> N <sub>2</sub> O <sub>2</sub> S [+ solvent] | 0.5(C <sub>33</sub> H <sub>28</sub> F <sub>3</sub> N <sub>2</sub> O <sub>2</sub> S), 0.5(C <sub>33</sub> H <sub>30</sub> F <sub>3</sub> N <sub>2</sub> O <sub>2</sub> S) |
| Sum formula            | C <sub>66</sub> H <sub>58</sub> F <sub>6</sub> N <sub>4</sub> O <sub>4</sub> S <sub>2</sub> [+ solvent]                                                                    | C <sub>33</sub> H <sub>29</sub> F <sub>3</sub> N <sub>2</sub> O <sub>2</sub> S                                                                                           |
| Mr                     | 1149.28                                                                                                                                                                    | 574.64                                                                                                                                                                   |
| Dx, g cm <sup>-3</sup> | 1.283                                                                                                                                                                      | 1.283                                                                                                                                                                    |
| Z                      | 4                                                                                                                                                                          | 8                                                                                                                                                                        |
| Mu (mm <sup>-1</sup> ) | 1.399                                                                                                                                                                      | 1.399                                                                                                                                                                    |
| F000                   | 2400.0                                                                                                                                                                     | 2400.0                                                                                                                                                                   |
| F000'                  | 2410.15                                                                                                                                                                    |                                                                                                                                                                          |
| h,k,lmax               | 27,13,30                                                                                                                                                                   | 27,13,30                                                                                                                                                                 |
| Nref                   | 10615                                                                                                                                                                      | 10529                                                                                                                                                                    |
| Tmin,Tmax              | 0.831,0.882                                                                                                                                                                | 0.400,1.000                                                                                                                                                              |
| Tmin'                  | 0.556                                                                                                                                                                      |                                                                                                                                                                          |
| Correction method=     | # Reported T Limits: Tmin=0.400 Tmax=1.000 AbsCorr =                                                                                                                       |                                                                                                                                                                          |
|                        | MULTI-SCAN                                                                                                                                                                 |                                                                                                                                                                          |
| Data completeness=     | 0.992                                                                                                                                                                      | Theta(max)= 67.077                                                                                                                                                       |
| R(reflections)=        | 0.1198( 7586)                                                                                                                                                              | wR2(reflections)= 0.2966( 10529)                                                                                                                                         |
| S =                    | 1.099                                                                                                                                                                      | Npar= 747                                                                                                                                                                |

Figure S6.

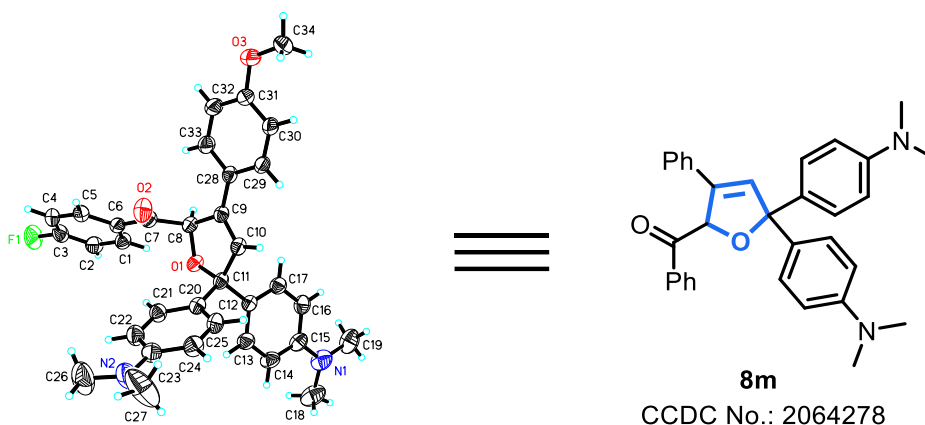

Bond precision: C-C = 0.0034 A Wavelength=0.71073

Cell: a=20.3167(8) b=11.1475(5) c=13.7918(6)  
 alpha=90 beta=109.564(1) gamma=90

Temperature: 293 K

|                | Calculated      | Reported        |
|----------------|-----------------|-----------------|
| Volume         | 2943.2(2)       | 2943.2(2)       |
| Space group    | P 21/c          | P 21/c          |
| Hall group     | -P 2ybc         | -P 2ybc         |
| Moiety formula | C34 H33 F N2 O3 | C34 H33 F N2 O3 |
| Sum formula    | C34 H33 F N2 O3 | C34 H33 F N2 O3 |
| Mr             | 536.62          | 536.62          |
| Dx,g cm-3      | 1.211           | 1.211           |
| Z              | 4               | 4               |
| Mu (mm-1)      | 0.082           | 0.082           |
| F000           | 1136.0          | 1136.0          |
| F000'          | 1136.52         |                 |
| h,k,lmax       | 24,13,16        | 24,13,16        |
| Nref           | 5490            | 5479            |
| Tmin,Tmax      | 0.986,0.991     | 0.652,0.746     |
| Tmin'          | 0.985           |                 |

Correction method= # Reported T Limits: Tmin=0.652 Tmax=0.746 AbsCorr =  
 MULTI-SCAN

Data completeness= 0.998

Theta(max)= 25.494

R(reflections)= 0.0516( 3286)

wR2(reflections)= 0.1329( 5479)

S = 1.023

Npar= 367



## 7. Characterization Data of Compounds<sup>a</sup>

### 2-((4-bromobenzyl)oxy)-5,5-bis(4-(dimethylamino)phenyl)-1,3-diphenylpenta-2,4-dien-1-one (5a)

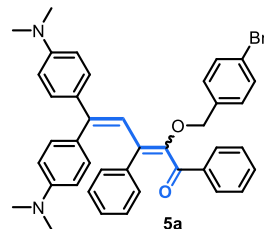

Orange solid, 82% yield, *Z/E* isomer (50:50) ratio. (*Z*)-**5a**: <sup>1</sup>H NMR (400 MHz, Chloroform-*d*)  $\delta$  7.60 (d, *J* = 7.7 Hz, 2H), 7.43 (d, *J* = 8.0 Hz, 2H), 7.29 (d, 1H), 7.25 – 7.12 (m, 6H), 6.89 – 6.83 (m, 2H), 6.82 – 6.76 (m, 3H), 6.74 – 6.63 (m, 5H), 6.31 (d, *J* = 8.3 Hz, 2H), 4.73 (s, 2H), 2.99 (s, 6H), 2.80 (s, 6H). <sup>13</sup>C NMR (100 MHz, Chloroform-*d*)  $\delta$  150.3, 149.8, 148.5, 147.7, 137.9, 137.2, 136.4, 133.7, 132.4, 131.8, 131.6, 131.5, 131.3, 130.8, 130.3, 130.3, 130.1, 129.6, 129.4, 129.3, 128.7, 128.3, 128.0, 127.8, 127.1, 126.7, 122.1, 120.4, 111.8, 111.6, 71.7, 40.6, 40.5.

Mixture of (*Z/E*) isomers of **5a**: <sup>1</sup>H NMR (400 MHz, Chloroform-*d*)  $\delta$  7.74 (d, *J* = 7.1 Hz, 2H), 7.69 (d, *J* = 7.1 Hz, 2H), 7.62 (d, *J* = 7.0 Hz, 2H), 7.51 (t, *J* = 7.4 Hz, 1H), 7.44 (d, *J* = 8.1 Hz, 2H), 7.39 – 7.34 (m, 5H), 7.33 – 7.28 (m, 3H), 7.24 – 7.15 (m, 6H), 7.02 (d, *J* = 8.1 Hz, 2H), 6.93 (d, *J* = 8.4 Hz, 2H), 6.89 – 6.85 (m, 2H), 6.80 (t, 3H), 6.73 – 6.69 (m, 4H), 6.67 (s, 1H), 6.60 (d, *J* = 8.4 Hz, 2H), 6.48 (dd, *J* = 15.0, 8.5 Hz, 4H), 6.32 (d, *J* = 8.4 Hz, 2H), 5.96 (s, 1H), 4.74 (s, 2H), 4.62 (s, 2H), 3.00 (s, 6H), 2.92 (d, *J* = 3.9 Hz, 12H), 2.81 (s, 6H). <sup>13</sup>C NMR (100 MHz, Chloroform-*d*)  $\delta$  194.1, 193.3, 150.3, 150.1, 149.8, 148.5, 148.4, 147.9, 147.7, 139.1, 138.0, 137.7, 137.3, 136.4, 136.0, 133.7, 132.4, 132.1, 131.8, 131.6, 131.5, 131.3, 130.8, 130.4, 130.3, 130.1, 129.6, 129.4, 129.4, 128.7, 128.4, 128.0, 127.9, 127.8, 127.4, 127.1, 126.8, 122.1, 121.9, 121.9, 120.4, 111.8, 111.6, 111.4, 72.5, 71.7, 40.7, 40.5, 40.4, 40.4. HRMS(ESI) Calcd. for C<sub>40</sub>H<sub>38</sub>BrN<sub>2</sub>O<sub>2</sub> (M+H)<sup>+</sup> 657.2111, found 657.2107.

### 2-((4-bromobenzyl)oxy)-5,5-bis(4-(dimethylamino)phenyl)-3-(4-fluorophenyl)-1-phenylpenta-2,4-dien-1-one (5b)

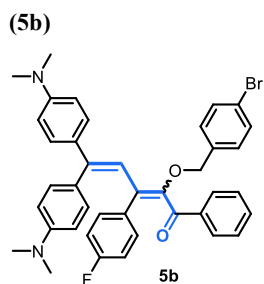

Orange solid, 77% yield, *Z/E* isomer (56:44) ratio. (*Z*)-**5b**: <sup>1</sup>H NMR (400 MHz, Chloroform-*d*)  $\delta$  7.58 (d, *J* = 7.7 Hz, 2H), 7.44 (d, *J* = 7.5 Hz, 2H), 7.32 (t, *J* = 7.5 Hz, 1H), 7.26 (s, 2H), 7.23 (d, *J* = 7.8 Hz, 2H), 7.21 – 7.13 (m, 4H), 6.85 (s, 1H), 6.76 (t, *J* = 6.8 Hz, 2H), 6.69 (dd, *J* = 16.0, 8.2 Hz, 4H), 6.34 (t, *J* = 8.5 Hz, 2H), 6.28 (d, *J* = 8.2 Hz, 2H), 4.79 (s, 2H), 2.99 (s, 6H), 2.80 (s, 6H). <sup>13</sup>C NMR (100 MHz, Chloroform-*d*)  $\delta$  193.9, 162.6, 160.1, 150.4, 149.9, 148.7, 148.1, 137.9, 136.2, 133.2 (d, *J* = 3.1 Hz), 133.0, 132.5, 132.0, 132.0, 131.6, 130.3, 129.4, 129.3, 128.4, 127.9, 122.2, 120.2, 114.0, 113.7, 111.8, 111.5, 71.8, 40.6, 40.5. <sup>19</sup>F NMR (376 MHz, Chloroform-*d*)  $\delta$  -116.01 – -116.23 (m).

(*E*)-(**5b**):  $^1\text{H}$  NMR (400 MHz, Chloroform-*d*)  $\delta$  7.75 (d,  $J = 7.7$  Hz, 2H), 7.55 (t,  $J = 6.6$  Hz, 2H), 7.50 (d,  $J = 7.4$  Hz, 1H), 7.41 – 7.33 (m, 4H), 7.01 – 6.91 (m, 4H), 6.85 (d,  $J = 7.7$  Hz, 2H), 6.65 (d,  $J = 7.3$  Hz, 2H), 6.47 (d,  $J = 8.2$  Hz, 4H), 6.03 (s, 1H), 4.58 (s, 2H), 2.91 (s, 12H).  $^{13}\text{C}$  NMR (100 MHz, Chloroform-*d*)  $\delta$  193.3, 163.4, 160.9, 150.2, 149.8, 148.4, 147.8, 138.8, 135.7, 133.6 (d,  $J = 3.3$  Hz), 132.3, 131.6, 131.4, 131.3, 130.8, 130.4, 130.1, 129.3, 128.8, 128.4, 127.4, 122.0, 121.3, 114.8, 114.6, 111.6, 111.4, 72.4, 40.4.  $^{19}\text{F}$  NMR (376 MHz, Chloroform-*d*)  $\delta$  -113.94 – -114.12 (m).

Mixture of (*Z/E*) isomers of **5b**:  $^1\text{H}$  NMR (400 MHz, Chloroform-*d*)  $\delta$  7.75 (d,  $J = 7.6$  Hz, 1.6H), 7.61 – 7.52 (m, 4H), 7.50 (d,  $J = 7.5$  Hz, 0.8H), 7.44 (d,  $J = 6.3$  Hz, 2H), 7.40 – 7.33 (m, 3.5H), 7.31 (d,  $J = 7.4$  Hz, 1H), 7.26 – 7.21 (m, 3H), 7.21 – 7.14 (m, 4H), 6.98 (d,  $J = 8.7$  Hz, 2H), 6.94 (d,  $J = 8.8$  Hz, 1H), 6.88 – 6.82 (m, 2.6H), 6.80 – 6.73 (m, 2.3H), 6.71 (d,  $J = 6.6$  Hz, 2H), 6.66 (t,  $J = 7.1$  Hz, 3.5H), 6.46 (d,  $J = 7.3$  Hz, 3H), 6.34 (t,  $J = 8.3$  Hz, 2H), 6.29 (d,  $J = 7.3$  Hz, 2H), 6.03 (s, 0.8H), 4.79 (s, 2H), 4.58 (s, 1.6H), 2.99 (s, 6H), 2.90 (s, 9.6H), 2.79 (s, 6H).  $^{13}\text{C}$  NMR (100 MHz, Chloroform-*d*)  $\delta$  193.9, 193.3, 163.4, 162.6, 160.9, 160.2, 150.4, 150.2, 149.9, 149.8, 148.7, 148.4, 148.1, 147.8, 138.8, 137.9, 136.2, 135.7, 133.6 (d,  $J = 3.3$  Hz), 133.2 (d,  $J = 3.3$  Hz), 133.0, 132.5, 132.3, 132.1, 132.0, 131.6, 131.4, 131.3, 130.8, 130.4, 130.4, 130.4, 130.1, 129.4, 129.3, 129.3, 128.8, 128.4, 128.4, 127.9, 127.4, 122.2, 122.0, 121.3, 120.2, 114.8, 114.6, 114.0, 113.8, 111.8, 111.6, 111.5, 111.4, 72.4, 71.9, 40.6, 40.5, 40.4, 40.4.  $^{19}\text{F}$  NMR (376 MHz, Chloroform-*d*)  $\delta$  -113.91 – -114.09 (m), -115.99 – -116.13 (m). HRMS(ESI) Calcd. for  $\text{C}_{40}\text{H}_{37}\text{BrFN}_2\text{O}_2$  ( $\text{M}+\text{H}$ ) $^+$  675.2017, found 675.2001.

## 2-((4-bromobenzyl)oxy)-5,5-bis(4-(dimethylamino)phenyl)-3-(4-ethylphenyl)-1-phenylpenta-2,4-dien-1-one

(**5c**)

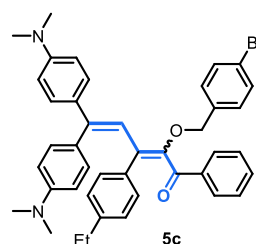

Orange solid, 80% yield, *Z/E* isomer (46:54) ratio. Mixture of (*Z/E*) isomers of **5c**:  $^1\text{H}$  NMR (400 MHz, Chloroform-*d*)  $\delta$  7.71 (d,  $J = 7.6$  Hz, 2H), 7.64 (d,  $J = 7.7$  Hz, 2H), 7.60 (d,  $J = 7.6$  Hz, 1.7H), 7.48 (t,  $J = 7.3$  Hz, 1H), 7.42 (d,  $J = 7.2$  Hz, 1.8H), 7.35 (d,  $J = 7.8$  Hz, 4H), 7.27 (t,  $J = 7.4$  Hz, 1H), 7.25 – 7.19 (m, 3H), 7.16 (d,  $J = 8.7$  Hz, 4H), 7.04 (d,  $J = 7.3$  Hz, 2H), 6.92 (d,  $J = 7.5$  Hz, 2H), 6.81 – 6.72 (m, 4H), 6.66 (d,  $J = 7.6$  Hz, 1.7H), 6.56 (d,  $J = 7.7$  Hz, 2H), 6.49 (t,  $J = 6.8$  Hz, 3.5H), 6.44 (d,  $J = 7.6$  Hz, 2H), 6.28 (d,  $J = 7.5$  Hz, 1.7H), 5.91 (s, 1H), 4.71 (s, 1.7H), 4.61 (s, 2H), 2.97 (s, 5H), 2.89 (d,  $J = 2.6$  Hz, 12H), 2.79 (s, 5H), 2.66 (q,  $J = 7.6$  Hz, 2H), 2.25 (q,  $J = 7.6$  Hz, 1.7H), 1.25 (t,  $J = 7.4$  Hz, 3.2H), 0.92 (t,  $J = 7.6$  Hz, 2.5H).  $^{13}\text{C}$  NMR (100 MHz, Chloroform-*d*)  $\delta$  194.3, 193.4, 150.3, 150.1, 149.8, 149.6, 148.4, 148.2, 147.7, 147.7, 144.3, 142.6, 139.4, 138.2, 136.5, 136.1, 134.9, 134.4, 134.0, 132.2, 132.0, 131.9, 131.8, 131.6, 131.5, 131.4, 131.3, 130.8, 130.5, 130.3, 130.1, 129.7, 129.5, 129.4, 129.3, 128.7, 128.7,

128.3, 127.8, 127.6, 127.5, 126.6, 122.2, 122.1, 121.8, 120.5, 111.8, 111.6, 111.4, 72.5, 71.7, 40.5, 40.5, 40.4, 40.4, 28.8, 28.5, 15.6, 15.5. HRMS(ESI) Calcd. for C<sub>42</sub>H<sub>41</sub>BrN<sub>2</sub>O<sub>2</sub>Na (M+Na)<sup>+</sup> 707.2244, found 707.2219.

**2-((4-bromobenzyl)oxy)-5,5-bis(4-(dimethylamino)phenyl)-1-phenyl-3-(*m*-tolyl)penta-2,4-dien-1-one (5d)**

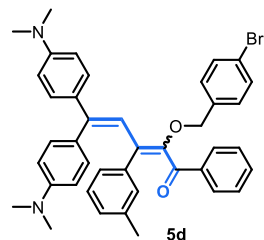

Orange solid, 83% yield, *Z/E* isomer (44:56) ratio. Mixture of (*Z/E*) isomers of **5d**: <sup>1</sup>H NMR (400 MHz, Chloroform-*d*)  $\delta$  7.73 (d, *J* = 7.6 Hz, 2H), 7.57 (d, *J* = 7.7 Hz, 1.6H), 7.49 (t, *J* = 8.1 Hz, 2.4H), 7.43 (d, *J* = 7.0 Hz, 3H), 7.39 – 7.32 (m, 4H), 7.29 (d, *J* = 7.8 Hz, 1H), 7.21 (t, *J* = 9.0 Hz, 4H), 7.15 (t, *J* = 7.5 Hz, 2H), 7.08 (d, *J* = 7.7 Hz, 1H), 7.03 (d, *J* = 7.9 Hz, 2H), 6.91 (d, *J* = 8.2 Hz, 2H), 6.78 (d, *J* = 10.0 Hz, 2.4H), 6.67 (d, *J* = 8.2 Hz, 2.4H), 6.59 (d, *J* = 8.7 Hz, 3.5H), 6.47 (dd, *J* = 14.5, 8.3 Hz, 4.8H), 6.30 (d, *J* = 8.2 Hz, 1.6H), 5.93 (s, 1H), 4.73 (s, 1.6H), 4.60 (s, 2H), 2.99 (s, 5H), 2.91 (d, *J* = 4.2 Hz, 12H), 2.80 (s, 5H), 2.30 (s, 3H), 1.91 (s, 2.5H). <sup>13</sup>C NMR (100 MHz, Chloroform-*d*)  $\delta$  194.1, 193.4, 150.3, 150.1, 149.7, 149.7, 148.4, 148.3, 147.9, 147.6, 139.2, 138.2, 137.5, 137.4, 136.9, 136.4, 136.1, 136.0, 134.1, 132.2, 132.0, 131.8, 131.5, 131.5, 131.5, 131.3, 130.8, 130.2, 130.1, 129.4, 129.3, 129.2, 128.8, 128.7, 128.7, 128.3, 127.9, 127.7, 127.4, 127.4, 127.0, 126.7, 122.1, 121.9, 120.4, 111.8, 111.6, 111.5, 111.4, 72.5, 71.7, 40.6, 40.5, 40.4, 40.4, 21.5, 20.8. HRMS(ESI) Calcd. for C<sub>41</sub>H<sub>40</sub>BrN<sub>2</sub>O<sub>2</sub> (M+H)<sup>+</sup> 671.2268, found 671.2258.

**5,5-bis(4-(dimethylamino)phenyl)-2-((2-methoxybenzyl)oxy)-3-(4-methoxyphenyl)-1-phenylpenta-2,4-dien-1-one (5e)**

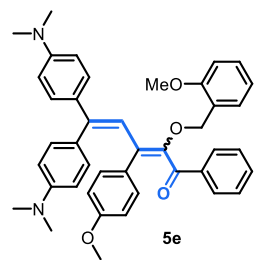

Orange solid, 84% yield, *Z/E* isomer (45:55) ratio. Mixture of (*Z/E*) isomers of **5e**: <sup>1</sup>H NMR (400 MHz, Chloroform-*d*)  $\delta$  7.74 – 7.68 (m, 4H), 7.66 (d, *J* = 6.8 Hz, 1.6H), 7.45 (t, *J* = 7.3 Hz, 1H), 7.35 (d, *J* = 7.5 Hz, 1H), 7.30 (q, *J* = 7.3 Hz, 4H), 7.23 – 7.18 (m, 3H), 7.15 (d, *J* = 8.1 Hz, 2H), 6.99 (s, 1H), 6.90 (d, *J* = 8.1 Hz, 3H), 6.84 – 6.76 (m, 5H), 6.71 (d, *J* = 8.4 Hz, 3.3H), 6.63 (t, *J* = 7.9 Hz, 4H), 6.46 (d, *J* = 9.3 Hz, 4H), 6.26 (d, *J* = 8.6 Hz, 1.7H), 6.19 (d, *J* = 8.4 Hz, 1.6H), 5.92 (s, 1H), 4.89 (s, 1.6H), 4.75 (s, 2H), 3.80 (s, 3H), 3.71 (s, 3H), 3.64 (s, 2.4H), 3.51 (s, 2.4H), 2.97 (s, 5H), 2.90 (s, 12H), 2.77 (s, 5H). <sup>13</sup>C NMR (100 MHz, Chloroform-*d*)  $\delta$  194.2, 193.3, 159.1, 158.0, 157.6, 157.3, 150.2, 150.0, 149.6, 149.6, 148.8, 147.8, 147.4, 147.1, 139.3, 138.3, 133.6, 132.4, 132.2, 132.1, 131.7, 131.6, 131.1, 130.7, 130.6, 130.5, 130.2, 129.8, 129.6, 129.4, 129.4, 129.4, 129.3, 128.8, 128.1, 127.7, 127.6, 125.7, 125.3, 122.5, 121.1, 120.3, 120.3, 113.3, 112.6, 111.8, 111.6, 111.6, 111.5, 110.2, 110.0, 67.7, 67.6, 55.3, 55.1, 55.1, 55.0, 40.7, 40.6, 40.5, 40.4. HRMS(ESI) Calcd. for C<sub>42</sub>H<sub>42</sub>N<sub>2</sub>O<sub>4</sub> (M+H)<sup>+</sup> 639.3217, found 639.3208.

**2-((4-bromobenzyl)oxy)-5,5-bis(4-(dimethylamino)phenyl)-3-(naphthalen-2-yl)-1-phenylpenta-2,4-dien-1-**

**one (5f)**

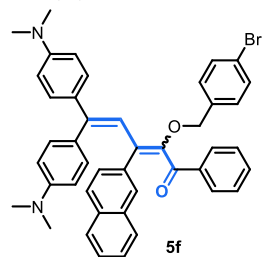

Orange solid, 85% yield, *Z/E* isomer (50:50) ratio. (*E*)-(**5f**): <sup>1</sup>H NMR (400 MHz, Chloroform-*d*)  $\delta$  8.00 (s, 1H), 7.86 – 7.77 (m, 4H), 7.74 (d, *J* = 8.8 Hz, 2H), 7.52 (t, 1H), 7.48 – 7.43 (m, 2H), 7.39 (t, *J* = 7.5 Hz, 2H), 7.33 (d, *J* = 7.9 Hz, 2H), 7.01 (d, *J* = 8.0 Hz, 2H), 6.92 (d, *J* = 8.2 Hz, 2H), 6.65 (d, *J* = 8.4 Hz, 2H), 6.48 (d, *J* = 8.3 Hz,

2H), 6.42 (d, *J* = 8.2 Hz, 2H), 6.10 (s, 1H), 4.63 (s, 2H), 2.91 (s, 6H), 2.84 (s, 6H). <sup>13</sup>C NMR (100 MHz, Chloroform-*d*)  $\delta$  193.5, 150.2, 149.8, 148.6, 148.4, 139.1, 135.9, 135.2, 133.2, 132.9, 132.2, 131.6, 131.5, 131.3, 130.8, 130.1, 129.4, 129.0, 128.8, 128.4, 128.3, 127.6, 127.4, 127.3, 126.1, 125.9, 121.9, 121.8, 111.6, 111.4, 72.7, 40.4, 40.3.

Mixture of (*Z/E*) isomers of **5f**: <sup>1</sup>H NMR (400 MHz, Chloroform-*d*)  $\delta$  8.00 (s, 1H), 7.86 – 7.77 (m, 4H), 7.77 – 7.71 (m, 2H), 7.59 – 7.51 (m, 3H), 7.46 (d, *J* = 7.7 Hz, 4H), 7.42 – 7.35 (m, 4H), 7.33 (d, *J* = 8.1 Hz, 2H), 7.27 (d, *J* = 10.6 Hz, 4H), 7.25 – 7.19 (m, 4H), 7.15 (s, 1H), 7.13 (d, *J* = 7.2 Hz, 1H), 7.08 (d, *J* = 8.5 Hz, 1H), 7.03 (t, *J* = 7.7 Hz, 4H), 6.94 (t, 4H), 6.68 (d, *J* = 7.2 Hz, 4H), 6.65 (d, *J* = 8.5 Hz, 2H), 6.47 (d, *J* = 8.4 Hz, 2H), 6.42 (d, *J* = 8.3 Hz, 2H), 6.09 (s, 1H), 6.00 (d, *J* = 8.2 Hz, 2H), 4.85 (s, 2H), 4.63 (s, 2H), 2.99 (s, 6H), 2.91 (s, 6H), 2.84 (s, 6H), 2.46 (s, 6H). <sup>13</sup>C NMR (100 MHz, Chloroform-*d*)  $\delta$  194.1, 193.4, 150.4, 150.2, 149.8, 149.5, 149.0, 148.6, 148.4, 148.1, 139.1, 138.1, 136.4, 135.9, 135.2, 134.8, 133.9, 133.2, 132.9, 132.5, 132.1, 132.1, 131.6, 131.6, 131.5, 131.3, 130.8, 130.3, 130.1, 129.4, 128.9, 128.9, 128.8, 128.4, 128.3, 128.2, 127.9, 127.7, 127.6, 127.4, 127.4, 127.3, 126.8, 126.6, 126.1, 125.9, 125.1, 125.0, 122.2, 121.9, 121.8, 120.1, 111.8, 111.5, 111.4, 111.2, 72.7, 71.9, 40.5, 40.4, 40.3, 40.2. HRMS(ESI) Calcd. for C<sub>44</sub>H<sub>40</sub>BrN<sub>2</sub>O<sub>2</sub> (M+H)<sup>+</sup> 707.2268, found 707.2234.

**2-((4-bromobenzyl)oxy)-5,5-bis(4-(dimethylamino)phenyl)-1-(4-fluorophenyl)-3-(thiophen-3-yl)penta-2,4-**

**dien-1-one (5g)**

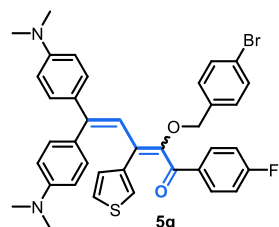

Orange solid, 76% yield, *Z/E* isomer (26:74) ratio. (*E*)-(**5g**): <sup>1</sup>H NMR (400 MHz, Chloroform-*d*)  $\delta$  7.67 (d, *J* = 2.9 Hz, 1H), 7.62 – 7.54 (m, 3H), 7.39 (d, *J* = 8.0 Hz, 2H), 7.31 (t, *J* = 4.2 Hz, 1H), 7.08 (d, *J* = 8.0 Hz, 2H), 6.95 (t, *J* = 8.5 Hz, 2H), 6.82 (d, *J* = 8.3 Hz, 2H), 6.69 (d, *J* = 8.3 Hz, 2H), 6.51 (d, *J* = 8.4 Hz, 2H), 6.44 (d, *J* =

8.3 Hz, 2H), 6.01 (s, 1H), 4.65 (s, 2H), 2.92 (d, *J* = 3.9 Hz, 12H). <sup>13</sup>C NMR (100 MHz, Chloroform-*d*)  $\delta$  191.5, 166.3, 163.8, 150.2, 149.7, 147.6, 146.8, 138.7, 135.7, 135.0, 135.0, 131.6, 131.3, 131.2, 130.7, 130.2, 129.3, 128.5, 127.2, 125.9, 125.4, 124.9, 122.2, 120.5, 115.3, 115.1, 111.5, 111.5, 72.0, 40.4, 40.3. <sup>19</sup>F NMR (376 MHz, Chloroform-*d*)  $\delta$  -106.8 – -106.9 (m). HRMS(ESI) Calcd. for C<sub>38</sub>H<sub>34</sub>BrFN<sub>2</sub>O<sub>2</sub>SNa (M+Na)<sup>+</sup> 703.1401, found 703.1378.

### 2-((4-bromobenzyl)oxy)-3-cyclopropyl-5,5-bis(4-(dimethylamino)phenyl)-1-phenylpenta-2,4-dien-1-one (5h)

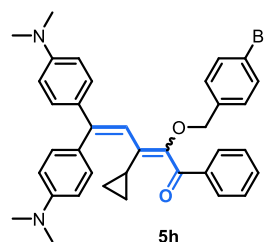

Orange solid, 73% yield, *Z/E* isomer (25:75) ratio. Mixture of (*Z/E*) isomers of **5h**:  $^1\text{H}$  NMR (400 MHz, Chloroform-*d*)  $\delta$  7.68 (d,  $J = 7.5$  Hz, 0.9H), 7.45 (d,  $J = 8.0$  Hz, 2.4H), 7.40 (d,  $J = 7.5$  Hz, 2.8H), 7.37 – 7.31 (m, 1.3H), 7.29 (d,  $J = 6.8$  Hz, 1H), 7.25 (d,  $J = 6.8$  Hz, 1.8H), 7.18 (d,  $J = 7.7$  Hz, 0.9H), 7.13 (d,  $J = 8.2$  Hz, 2H), 7.08 (d,  $J = 7.5$  Hz, 0.7H), 6.99 (d,  $J = 7.5$  Hz, 0.8H), 6.88 (d,  $J = 7.6$  Hz, 2H), 6.65 (t,  $J = 6.7$  Hz, 1.6H), 6.58 (d,  $J = 8.5$  Hz, 2H), 6.50 (d,  $J = 7.8$  Hz, 2H), 6.45 (d,  $J = 7.8$  Hz, 1.8H), 6.25 (s, 0.3H), 5.41 (s, 1H), 4.61 (s, 2H), 4.43 (s, 0.7H), 2.98 (d,  $J = 3.1$  Hz, 4H), 2.93 (s, 6H), 2.88 (s, 6H), 2.28 (p,  $J = 7.2$  Hz, 1H), 1.38 (t,  $J = 7.1$  Hz, 0.3H), 0.80 (d,  $J = 6.9$  Hz, 4H), 0.34 (dd,  $J = 24.5, 6.9$  Hz, 1.3H).  $^{13}\text{C}$  NMR (100 MHz, Chloroform-*d*)  $\delta$  194.5, 192.4, 150.2, 150.0, 149.9, 149.6, 148.5, 148.1, 147.9, 146.7, 139.2, 137.9, 136.6, 136.5, 136.3, 135.1, 132.7, 132.2, 131.8, 131.6, 131.5, 131.4, 131.2, 130.9, 130.3, 129.9, 129.8, 129.7, 129.3, 129.2, 128.9, 128.1, 128.0, 127.3, 122.0, 121.7, 117.8, 116.7, 111.8, 111.5, 111.4, 111.4, 72.1, 72.0, 40.5, 40.5, 40.4, 13.5, 13.0, 7.8, 6.1. HRMS(ESI) Calcd. for  $\text{C}_{37}\text{H}_{37}\text{BrN}_2\text{O}_2\text{Na}$  ( $\text{M}+\text{Na}$ ) $^+$  621.2111, found 621.2090.

### 3-(2,2-bis(4-(dimethylamino)phenyl)vinyl)-2-((4-bromobenzyl)oxy)-1-phenylhept-2-en-1-one (5i)

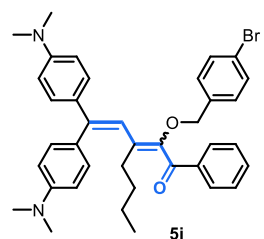

Orange solid, 75% yield, *Z/E* isomer (33:67) ratio. Mixture of (*Z/E*) isomers of **5i**:  $^1\text{H}$  NMR (400 MHz, Chloroform-*d*)  $\delta$  7.69 (d,  $J = 8.0$  Hz, 1H), 7.53 (d,  $J = 7.9$  Hz, 2H), 7.35 (d,  $J = 7.7$  Hz, 2H), 7.29 (d,  $J = 8.7$  Hz, 2H), 7.20 (d,  $J = 9.6$  Hz, 3H), 7.05 (d,  $J = 8.3$  Hz, 1.2H), 6.99 (d,  $J = 7.9$  Hz, 2H), 6.94 (t,  $J = 7.3$  Hz, 2H), 6.81 (d,  $J = 8.3$  Hz, 2H), 6.77 (d,  $J = 8.2$  Hz, 2H), 6.58 (t,  $J = 7.6$  Hz, 2H), 6.46 (d,  $J = 8.3$  Hz, 2H), 6.41 (d,  $J = 8.2$  Hz, 2H), 6.34 (s, 0.5H), 5.99 (s, 1H), 4.40 (s, 1.9H), 4.38 (s, 0.9H), 2.91 (s, 6H), 2.87 (s, 6H), 2.84 (s, 6H), 2.14 (t,  $J = 7.8$  Hz, 2H), 1.83 (t,  $J = 7.7$  Hz, 1H), 1.40 – 1.29 (m, 3H), 1.18 – 1.12 (m, 2H), 0.97 – 0.90 (m, 1H), 0.79 (t,  $J = 7.2$  Hz, 3.2H), 0.61 (t,  $J = 7.3$  Hz, 1.6H).  $^{13}\text{C}$  NMR (100 MHz, Chloroform-*d*)  $\delta$  192.6, 191.6, 150.2, 150.1, 150.0, 149.5, 147.4, 147.3, 146.0, 145.4, 139.1, 138.5, 136.3, 136.2, 136.1, 136.0, 135.8, 132.2, 131.9, 131.5, 131.4, 131.1, 131.1, 130.7, 130.3, 129.3, 129.1, 128.9, 128.6, 128.3, 127.8, 122.2, 122.1, 120.9, 119.6, 111.8, 111.7, 111.7, 111.5, 72.7, 72.3, 40.5, 40.5, 40.3, 32.0, 30.7, 30.2, 29.0, 23.0, 22.4, 14.0, 13.8. HRMS(ESI) Calcd. for  $\text{C}_{38}\text{H}_{42}\text{BrN}_2\text{O}_2$  ( $\text{M}+\text{H}$ ) $^+$  637.2261, found: 637.2243.

**1-(benzo[d][1,3]dioxol-5-yl)-2-((4-bromobenzyl)oxy)-5,5-bis(4-(dimethylamino)phenyl)-3-(4-methoxyphenyl)-penta-2,4-dien-1-one (5j)**

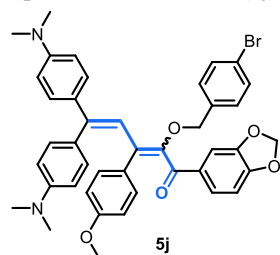

Orange solid, 81% yield, *Z/E* isomer (53:47) ratio. Mixture of (*Z/E*) isomers of **5j**:

$^1\text{H NMR}$  (400 MHz, Chloroform-*d*)  $\delta$  7.58 (d,  $J = 8.9$  Hz, 1.8H), 7.40 (d,  $J = 8.5$  Hz, 2H), 7.34 (dd,  $J = 8.1, 2.7$  Hz, 3H), 7.25 – 7.12 (m, 8H), 7.02 (d,  $J = 8.0$  Hz, 2H), 6.86 (d,  $J = 8.3$  Hz, 2H), 6.83 – 6.78 (m, 5H), 6.76 (s, 2H), 6.73 – 6.69 (m, 2H), 6.64

(d,  $J = 8.4$  Hz, 2H), 6.57 (d,  $J = 8.1$  Hz, 1H), 6.51 (d,  $J = 8.4$  Hz, 1.8H), 6.42 (d,  $J = 8.3$  Hz, 1.8H), 6.30 (dd,  $J = 13.5, 8.3$  Hz, 4H), 6.02 (s, 1H), 5.97 (s, 1.8H), 5.90 (s, 2H), 4.67 (s, 2H), 4.57 (s, 1.8H), 3.79 (s, 2.7H), 3.54 (s, 3H), 2.96 (s, 6H), 2.88 (d,  $J = 7.1$  Hz, 11H), 2.79 (s, 6H).  $^{13}\text{C NMR}$  (100 MHz, Chloroform-*d*)  $\delta$  192.4, 191.7, 159.2, 158.2, 151.3, 151.0, 150.3, 150.2, 149.7, 149.7, 147.8, 147.7, 147.5, 147.3, 147.3, 147.1, 136.5, 136.0, 133.2, 132.7, 132.0, 131.9, 131.8, 131.5, 131.4, 131.4, 131.0, 130.8, 130.2, 130.0, 130.0, 129.8, 129.4, 129.3, 128.8, 127.6, 126.4, 125.3, 122.0, 121.9, 121.7, 120.5, 113.4, 112.8, 111.8, 111.6, 111.6, 111.6, 108.8, 108.8, 107.7, 107.5, 101.7, 101.6, 72.3, 71.6, 55.3, 55.0, 40.6, 40.5, 40.5, 40.4. HRMS(ESI) Calcd. for  $\text{C}_{42}\text{H}_{39}\text{BrN}_2\text{O}_5\text{Na}$  ( $\text{M}+\text{Na}$ ) $^+$  753.1935, found 753.1911.

**2-((4-bromobenzyl)oxy)-5,5-bis(4-(dimethylamino)phenyl)-3-(4-methoxyphenyl)-1-(naphthalen-2-yl)penta-2,4-dien-1-one (5k)**

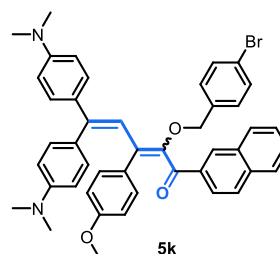

Orange solid, 83% yield, *Z/E* isomer (47:53) ratio. Mixture of (*Z/E*) isomers of **5k**:

$^1\text{H NMR}$  (400 MHz, Chloroform-*d*)  $\delta$  8.11 (d,  $J = 9.5$  Hz, 2H), 7.85 (d,  $J = 8.3$  Hz, 1H), 7.83 – 7.76 (m, 4H), 7.73 (d,  $J = 9.0$  Hz, 3.7H), 7.64 (d,  $J = 8.7$  Hz, 1H), 7.57 (t,  $J = 7.6$  Hz, 1H), 7.53 – 7.45 (m, 2.8H), 7.42 (d,  $J = 7.9$  Hz, 2H), 7.35 (d,  $J = 8.3$

Hz, 2H), 7.25 (d,  $J = 7.4$  Hz, 3.6H), 7.04 (d,  $J = 8.5$  Hz, 2H), 6.91 (d,  $J = 7.2$  Hz, 4H), 6.87 (s, 0.9H), 6.85 – 6.77 (m, 3.6H), 6.70 (d,  $J = 8.8$  Hz, 1.8H), 6.60 (d,  $J = 8.0$  Hz, 2H), 6.42 – 6.29 (m, 5.8H), 6.18 (d,  $J = 8.5$  Hz, 1.8H), 6.03 (s, 1H), 4.79 (s, 1.8H), 4.65 (s, 2H), 3.85 (s, 3H), 3.41 (s, 2.7H), 3.00 (s, 5.4H), 2.85 (s, 6H), 2.81 (s, 5.4H), 2.78 (s, 6H).  $^{13}\text{C NMR}$  (100 MHz, Chloroform-*d*)  $\delta$  194.2, 193.4, 159.4, 158.2, 150.3, 150.1, 149.7, 149.5, 148.2, 147.7, 147.7, 147.5, 136.5, 135.9, 135.9, 135.4, 135.3, 135.2, 133.5, 132.7, 132.2, 132.0, 131.8, 131.6, 131.5, 131.5, 131.4, 131.0, 130.9, 130.8, 130.4, 130.3, 130.1, 130.1, 129.8, 129.7, 129.5, 129.3, 128.7, 128.1, 127.9, 127.9, 127.7, 127.6, 127.4, 126.3, 126.3, 124.8, 124.8, 122.1, 122.0, 121.8, 120.6, 113.6, 112.9, 111.8, 111.6, 111.5, 111.3, 72.4, 71.7, 55.4, 55.0, 40.6, 40.5, 40.4, 40.1. HRMS(ESI) Calcd. for  $\text{C}_{45}\text{H}_{42}\text{BrN}_2\text{O}_3$  ( $\text{M}+\text{H}$ ) $^+$  737.2373, found 737.2330.

### 5,5-bis(4-(dimethylamino)phenyl)-2-methoxy-3-(4-methoxyphenyl)-1-phenylpenta-2,4-dien-1-one (5l)

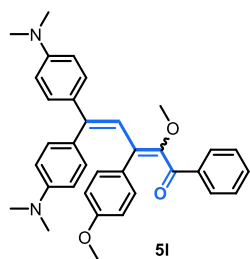

Orange solid, 72% yield, *Z/E* isomer (43:57) ratio. Mixture of (*Z/E*) isomers of **5l**:  $^1\text{H}$  NMR (400 MHz, Chloroform-*d*)  $\delta$  7.75 (d,  $J = 7.7$  Hz, 3.6H), 7.70 (d,  $J = 6.8$  Hz, 2H), 7.49 (t, 1H), 7.35 (q,  $J = 7.1$  Hz, 3H), 7.30 (d,  $J = 6.8$  Hz, 1.5H), 7.26 – 7.19 (m, 2H), 6.96 – 6.88 (m, 5.6H), 6.85 (d,  $J = 6.6$  Hz, 1.5H), 6.79 (s, 0.7H), 6.68 (d,  $J = 6.9$  Hz, 1.6H), 6.61 (d,  $J = 6.8$  Hz, 2H), 6.52 – 6.45 (m, 4H), 6.42 (d,  $J = 6.7$  Hz, 1.5H), 6.31 (d,  $J = 6.6$  Hz, 1.5H), 5.89 (s, 1H), 3.84 (s, 3H), 3.56 (s, 2.2H), 3.52 (s, 3H), 3.49 (s, 2.1H), 2.98 (s, 4.7H), 2.92 (s, 12H), 2.83 (s, 4.4H).  $^{13}\text{C}$  NMR (100 MHz, Chloroform-*d*)  $\delta$  194.3, 193.3, 159.4, 158.3, 150.3, 150.1, 149.8, 149.7, 149.2, 148.5, 147.9, 147.1, 139.6, 138.3, 132.4, 132.0, 131.8, 131.5, 131.4, 131.0, 130.9, 130.7, 130.1, 130.1, 129.9, 129.4, 129.4, 129.2, 129.1, 128.6, 128.3, 128.0, 127.4, 122.2, 120.5, 113.6, 112.9, 111.8, 111.7, 111.6, 111.4, 58.4, 58.0, 55.3, 55.0, 40.6, 40.5, 40.5, 40.4. HRMS(ESI) Calcd. for  $\text{C}_{35}\text{H}_{36}\text{N}_2\text{O}_3$  ( $\text{M}+\text{H}$ ) $^+$  532.2799, found 533.2767.

### 5,5-bis(4-(dimethylamino)phenyl)-2-ethoxy-3-(4-methoxyphenyl)-1-phenylpenta-2,4-dien-1-one (5m)

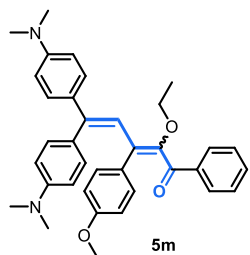

Orange solid, 68% yield, *Z/E* isomer (40:60) ratio. Mixture of (*Z/E*) isomers of **5m**:  $^1\text{H}$  NMR (400 MHz, Chloroform-*d*)  $\delta$  7.79 – 7.71 (m, 5.3H), 7.47 (t,  $J = 7.1$  Hz, 1H), 7.38 – 7.30 (m, 3.5H), 7.29 (s, 0.7H), 7.26 – 7.21 (m, 1.5H), 6.93 (s, 0.7H), 6.90 (d,  $J = 8.1$  Hz, 4H), 6.84 (d,  $J = 8.0$  Hz, 1.5H), 6.79 (d,  $J = 7.9$  Hz, 1.4H), 6.68 (d,  $J = 8.3$  Hz, 1.5H), 6.64 (d,  $J = 8.1$  Hz, 2H), 6.53 – 6.44 (m, 4H), 6.35 (d,  $J = 8.0$  Hz, 1.4H), 6.26 (d,  $J = 8.0$  Hz, 1.4H), 5.93 (s, 1H), 3.84 (s, 3H), 3.79 (q, 1.4H), 3.72 (q, 2H), 3.54 (s, 2H), 2.98 (s, 4.5H), 2.91 (s, 12H), 2.81 (s, 4.3H), 1.27 (t,  $J = 6.8$  Hz, 2H), 1.17 (t,  $J = 6.9$  Hz, 3H).  $^{13}\text{C}$  NMR (100 MHz, Chloroform-*d*)  $\delta$  194.6, 193.6, 159.2, 158.1, 150.2, 150.1, 149.7, 149.6, 148.9, 147.9, 147.5, 146.9, 139.2, 138.1, 132.4, 132.2, 132.1, 131.8, 131.6, 131.5, 130.9, 130.7, 130.2, 130.0, 129.5, 129.4, 129.3, 129.3, 129.0, 128.7, 128.2, 128.0, 127.5, 122.3, 120.7, 113.5, 112.8, 111.9, 111.6, 111.6, 111.5, 66.8, 66.4, 55.3, 55.0, 40.7, 40.5, 40.5, 40.4, 15.8, 15.4. HRMS(ESI) Calcd. for  $\text{C}_{36}\text{H}_{39}\text{N}_2\text{O}_3$  ( $\text{M}+\text{H}$ ) $^+$  547.2955, found 547.2924.

### 5,5-bis(4-(dimethylamino)phenyl)-2-isopropoxy-3-(4-methoxyphenyl)-1-phenylpenta-2,4-dien-1-one (5n)

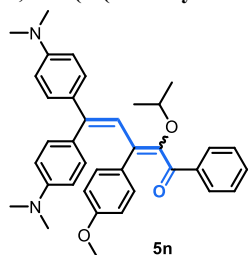

Orange solid, 70% yield, *Z/E* isomer (67:33) ratio. Mixture of (*Z/E*) isomers of **5n**:  $^1\text{H}$  NMR (400 MHz, Chloroform-*d*)  $\delta$  7.78 (d,  $J = 7.9$  Hz, 3H), 7.75 (d,  $J = 7.4$  Hz, 1H), 7.45 (t,  $J = 7.5$  Hz, 0.6H), 7.38 – 7.30 (m, 2H), 7.28 – 7.21 (m, 4H), 7.05 (s, 1H), 6.85 (t,  $J = 7.9$  Hz, 2H), 6.78 – 6.70 (m, 4H), 6.70 – 6.64 (m, 3H), 6.48 (d,  $J = 8.3$  Hz, 1H), 6.43 (d,  $J = 8.2$  Hz, 1H), 6.28 (d,  $J = 8.3$  Hz, 2H), 6.21 (d,  $J = 8.7$  Hz, 2H), 6.04 (s, 0.5H), 4.11 – 4.01 (m, 1H), 4.00

- 3.91 (m, 0.5H), 3.81 (s, 1.5H), 3.51 (s, 3H), 2.96 (s, 6H), 2.89 (s, 6H), 2.78 (s, 6H), 1.28 (d,  $J = 6.0$  Hz, 6H), 1.10 (d,  $J = 6.0$  Hz, 3H).  $^{13}\text{C}$  NMR (100 MHz, Chloroform- $d$ )  $\delta$  194.5, 193.5, 158.9, 157.9, 150.2, 150.0, 149.6, 148.6, 147.2, 146.9, 146.8, 138.8, 138.0, 132.7, 132.5, 132.4, 132.2, 131.9, 131.6, 131.6, 130.9, 130.7, 130.5, 129.9, 129.4, 129.3, 129.0, 128.9, 128.5, 128.3, 128.0, 127.9, 122.6, 121.2, 113.3, 112.7, 111.9, 111.7, 111.6, 111.5, 73.3, 73.2, 55.3, 55.0, 40.7, 40.5, 40.5, 40.5, 22.9, 22.9. HRMS(ESI) Calcd. for  $\text{C}_{37}\text{H}_{41}\text{N}_2\text{O}_3$  ( $\text{M}+\text{H}$ ) $^+$  561.3112, found 561.3106.

**2-(cyclopentyloxy)-5,5-bis(4-(dimethylamino)phenyl)-3-(4-methoxyphenyl)-1-phenylpenta-2,4-dien-1-one**

(5o)

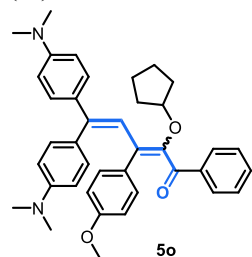

Orange solid, 76% yield,  $Z/E$  isomer (56:44) ratio. Mixture of ( $Z/E$ ) isomers of **5o**:  $^1\text{H}$  NMR (400 MHz, Chloroform- $d$ )  $\delta$  7.82 – 7.67 (m, 5H), 7.47 (t,  $J = 7.3$  Hz, 1H), 7.39 – 7.30 (m, 2.7H), 7.29 – 7.19 (m, 4.5H), 7.01 (s, 1H), 6.85 (t,  $J = 7.2$  Hz, 3H), 6.73 (t, 4H), 6.67 (d,  $J = 8.4$  Hz, 2H), 6.63 (d,  $J = 8.1$  Hz, 1.6H), 6.46 (t,  $J = 6.9$  Hz, 3H), 6.28 (d,  $J = 8.2$  Hz, 2H), 6.21 (d,  $J = 8.2$  Hz, 2H), 6.04 (s, 0.8H), 4.41 (s, 1H), 4.26 (s, 0.8H), 3.82 (s, 2.4H), 3.52 (s, 3H), 2.97 (s, 6H), 2.90 (s, 9.4H), 2.79 (s, 6H), 1.99 – 1.83 (m, 4H), 1.75 – 1.64 (m, 4H), 1.63 – 1.54 (m, 4H), 1.53 – 1.46 (m, 1.5H), 1.43 – 1.39 (m, 1H).

$^{13}\text{C}$  NMR (100 MHz, Chloroform- $d$ )  $\delta$  194.5, 193.5, 158.8, 157.9, 150.1, 150.0, 149.6, 149.5, 148.4, 147.1, 146.9, 146.5, 139.1, 138.0, 132.4, 132.3, 132.3, 132.2, 131.9, 131.6, 130.8, 130.7, 130.6, 129.8, 129.4, 129.2, 129.0, 128.9, 128.4, 128.3, 127.9, 122.5, 120.8, 113.2, 112.7, 111.9, 111.7, 111.6, 111.5, 82.6, 82.1, 55.3, 55.0, 40.7, 40.5, 40.5, 40.5, 33.1, 33.0, 23.9, 23.6. HRMS(ESI) Calcd. for  $\text{C}_{39}\text{H}_{43}\text{N}_2\text{O}_3$  ( $\text{M}+\text{H}$ ) $^+$  587.3268, found 587.3246.

**3,3-bis(4-(dimethylamino)phenyl)-5-(4-fluorophenyl)-1-phenyl-2-(2,2,2-trifluoroethoxy)pent-4-yn-1-one (6a)**

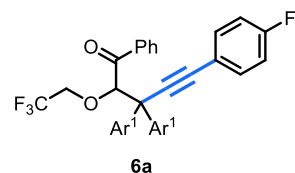

Gray-green oil, 85% yield.  $^1\text{H}$  NMR (400 MHz, Chloroform- $d$ )  $\delta$  7.81 (d,  $J = 7.5$  Hz, 2H), 7.44 (d,  $J = 8.4$  Hz, 2H), 7.39 (t,  $J = 7.3$  Hz, 1H), 7.29 – 7.21 (m, 4H), 7.15 (t,  $J = 6.8$  Hz, 2H), 6.90 (t,  $J = 8.4$  Hz, 2H), 6.67 (d,  $J = 8.4$  Hz, 2H), 6.54 (d,  $J = 8.3$  Hz, 2H), 5.70 (s, 1H), 3.90 (dq,  $J = 12.2, 9.6$  Hz, 1H), 3.76 (dq,  $J = 13.5, 8.3$  Hz, 1H), 2.93 (s, 6H), 2.86 (s, 6H).

$^{13}\text{C}$  NMR (100 MHz, Chloroform- $d$ )  $\delta$  197.1, 163.6 (d,  $J = 250.3$  Hz), 149.5, 138.1, 133.4, 133.4, 132.5, 129.9, 129.6, 129.1, 129.0, 128.9, 128.0, 123.6 (q,  $J = 279.9$  Hz), 119.4 (d,  $J = 3.6$  Hz), 115.2 (d,  $J = 21.7$  Hz), 112.0, 111.8, 91.4, 87.6, 86.5, 67.3 (d,  $J = 34.6$  Hz), 52.1, 40.5, 40.5.  $^{19}\text{F}$  NMR (376 MHz, Chloroform- $d$ )  $\delta$  -73.18 (t,  $J = 8.7$  Hz), -111.58 – -111.72 (m). HRMS(ESI) Calcd. for  $\text{C}_{35}\text{H}_{32}\text{F}_4\text{N}_2\text{O}_2\text{Na}$  ( $\text{M}+\text{Na}$ ) $^+$  611.2292, found 611.2250.



**5-(4-chlorophenyl)-3,3-bis(4-(dimethylamino)phenyl)-1-phenyl-2-(2,2,2-trifluoroethoxy)pent-4-yn-1-one (6b)**

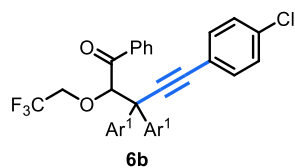

Gray-green oil, 86% yield. <sup>1</sup>H NMR (400 MHz, Chloroform-*d*)  $\delta$  7.78 (d,  $J$  = 7.7 Hz, 2H), 7.40 (d,  $J$  = 8.2 Hz, 2H), 7.36 (t,  $J$  = 7.3 Hz, 1H), 7.25 – 7.19 (m, 4H), 7.16 (d,  $J$  = 7.8 Hz, 2H), 7.07 (d,  $J$  = 7.9 Hz, 2H), 6.64 (d,  $J$  = 8.1 Hz, 2H), 6.51 (d,

$J$  = 8.1 Hz, 2H), 5.67 (s, 1H), 3.90 (dq,  $J$  = 13.1, 8.6 Hz, 1H), 3.57 (dq,  $J$  = 13.1, 8.6 Hz, 1H), 2.91 (s, 6H), 2.83 (s, 6H). <sup>13</sup>C NMR (100 MHz, Chloroform-*d*)  $\delta$  197.1, 149.5, 138.1, 133.9, 132.8, 132.6, 129.7, 129.6, 129.0, 128.8, 128.3, 128.0, 123.6 (q,  $J$  = 279.2 Hz), 121.8, 112.0, 111.8, 92.8, 87.5, 86.4, 67.2 (q,  $J$  = 34.9 Hz), 52.1, 40.5, 40.5. <sup>19</sup>F NMR (376 MHz, Chloroform-*d*)  $\delta$  -73.17 (t,  $J$  = 8.6 Hz). HRMS(ESI) Calcd. for C<sub>35</sub>H<sub>32</sub>ClF<sub>3</sub>N<sub>2</sub>O<sub>2</sub>Na (M+Na)<sup>+</sup> 627.1997, found 627.1956.

**5-([1,1'-biphenyl]-4-yl)-3,3-bis(4-(dimethylamino)phenyl)-1-phenyl-2-(2,2,2-trifluoroethoxy)pent-4-yn-1-one**

**(6c)**

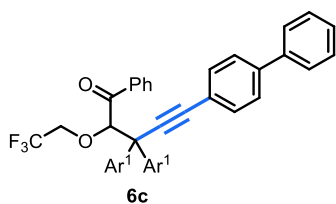

Gray-green oil, 87% yield. <sup>1</sup>H NMR (400 MHz, Chloroform-*d*)  $\delta$  7.86 (d,  $J$  = 7.7 Hz, 2H), 7.56 (d,  $J$  = 7.6 Hz, 2H), 7.50 - 7.46 (m, 3H), 7.46 – 7.38 (m, 4H), 7.38 – 7.28 (m, 4H), 7.28 - 7.22 (m, 3H), 6.68 (d,  $J$  = 8.4 Hz, 2H), 6.56 (d,  $J$  = 8.4 Hz, 2H), 5.72 (s, 1H), 4.01 – 3.89 (m, 1H), 3.86 – 3.75 (m, 1H), 2.94 (s,

6H), 2.87 (s, 6H). <sup>13</sup>C NMR (100 MHz, Chloroform-*d*)  $\delta$  197.2, 149.5, 140.6, 140.5, 138.1, 132.6, 132.0, 130.0, 129.7, 129.1, 129.0, 128.8, 128.0, 127.5, 127.0, 126.7, 123.6 (q,  $J$  = 276.1 Hz), 122.3, 112.1, 111.8, 92.5, 88.6, 86.7, 67.2 (q,  $J$  = 35.0 Hz), 52.2, 40.6, 40.5. <sup>19</sup>F NMR (376 MHz, Chloroform-*d*)  $\delta$  -73.2 (t,  $J$  = 8.7 Hz). HRMS(ESI) Calcd. for C<sub>41</sub>H<sub>37</sub>F<sub>3</sub>N<sub>2</sub>O<sub>2</sub>Na (M+Na)<sup>+</sup> 669.2699, found 669.2647.

**3,3-bis(4-(dimethylamino)phenyl)-5-(4-methoxyphenyl)-1-phenyl-2-(2,2,2-trifluoroethoxy)pent-4-yn-1-one (6d)**

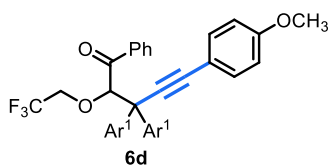

Gray-green oil, 83% yield. <sup>1</sup>H NMR (400 MHz, Chloroform-*d*)  $\delta$  7.77 (d,  $J$  = 7.8 Hz, 2H), 7.38 (d,  $J$  = 8.1 Hz, 2H), 7.32 (t,  $J$  = 7.5 Hz, 1H), 7.23 (d,  $J$  = 8.5 Hz, 2H), 7.18 (t,  $J$  = 7.3 Hz, 2H), 7.01 (d,  $J$  = 8.1 Hz, 2H), 6.66 (d,  $J$  = 8.3 Hz,

2H), 6.59 (d,  $J$  = 8.5 Hz, 2H), 6.48 (d,  $J$  = 8.4 Hz, 2H), 5.62 (s, 1H), 3.85 (dq,  $J$  = 13.2, 8.7 Hz, 1H), 3.76 – 3.71 (m, 1H), 3.69 (s, 3H), 2.85 (s, 6H), 2.79 (s, 6H). <sup>13</sup>C NMR (100 MHz, Chloroform-*d*)  $\delta$  197.3, 159.3, 149.4, 138.1, 132.9, 132.5, 130.4, 129.7, 129.2, 129.1, 129.0, 128.0, 123.6 (q,  $J$  = 280.2 Hz), 115.5, 113.6, 112.0, 111.8, 90.2, 88.7, 86.8, 67.4 (q,  $J$  = 35.0 Hz), 55.3, 52.0, 40.6, 40.5. <sup>19</sup>F NMR (376 MHz, Chloroform-*d*)  $\delta$  -73.20 (t,  $J$  = 8.6 Hz). HRMS(ESI)

Calcd. for C<sub>36</sub>H<sub>35</sub>F<sub>3</sub>N<sub>2</sub>O<sub>3</sub>Na (M+Na)<sup>+</sup> 623.2504, found 623.2481.

**3,3-bis(4-(dimethylamino)phenyl)-1-phenyl-5-(m-tolyl)-2-(2,2,2-trifluoroethoxy)pent-4-yn-1-one (6e)**

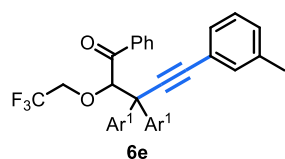

Gray-green oil, 88% yield. <sup>1</sup>H NMR (400 MHz, Chloroform-*d*) δ 7.83 (d, *J* = 7.7 Hz, 2H), 7.43 (d, *J* = 7.7 Hz, 2H), 7.38 (t, *J* = 7.4 Hz, 1H), 7.28 (d, *J* = 7.7 Hz, 2H), 7.23 (d, *J* = 7.7 Hz, 2H), 7.07 (t, *J* = 7.4 Hz, 1H), 7.02 (d, *J* = 7.7 Hz, 1H), 6.95 (d, *J* =

7.6 Hz, 1H), 6.91 (s, 1H), 6.64 (d, *J* = 7.7 Hz, 2H), 6.53 (d, *J* = 7.7 Hz, 2H), 5.68 (s, 1H), 3.90 (dq, *J* = 12.6, 9.6 Hz, 1H), 3.75 (dq, *J* = 12.6, 9.6 Hz, 1H), 2.91 (s, 6H), 2.84 (s, 6H), 2.23 (s, 3H). <sup>13</sup>C NMR (100 MHz, Chloroform-*d*) δ 197.1, 149.4, 138.1, 137.6, 132.5, 132.1, 130.2, 129.7, 129.1, 129.0, 129.0, 128.8, 128.6, 128.0, 127.8, 123.6 (q, *J* = 280.8 Hz), 123.1, 112.0, 111.8, 91.3, 86.7, 67.4 (q, *J* = 34.6 Hz), 52.0, 40.6, 40.5, 21.2. <sup>19</sup>F NMR (376 MHz, Chloroform-*d*) δ -73.22 (t, *J* = 8.6 Hz). HRMS(ESI) Calcd. for C<sub>36</sub>H<sub>35</sub>F<sub>3</sub>N<sub>2</sub>O<sub>2</sub>Na (M+Na)<sup>+</sup> 607.2543, found 607.2517.

**3,3-bis(4-(dimethylamino)phenyl)-5-(naphthalen-2-yl)-1-phenyl-2-(2,2,2-trifluoroethoxy)pent-4-yn-1-one (6f)**

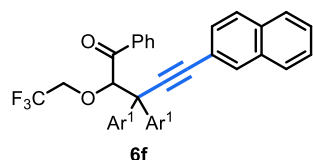

Gray-green oil, 85% yield. <sup>1</sup>H NMR (400 MHz, Chloroform-*d*) δ 7.89 (d, *J* = 7.6 Hz, 2H), 7.76 (dd, *J* = 7.7 Hz, 2.4 Hz, 1H), 7.72 – 7.64 (m, 2H), 7.60 (s, 1H), 7.50 (d, *J* = 8.8 Hz, 2H), 7.47 – 7.42 (m, 2H), 7.39 (t, *J* = 7.5 Hz, 1H), 7.35 (d, *J* = 8.5

Hz, 2H), 7.30 – 7.21 (m, 3H), 6.69 (d, *J* = 8.5 Hz, 2H), 6.58 (d, *J* = 8.5 Hz, 2H), 5.75 (s, 1H), 3.95 (dq, *J* = 12.9, 8.9 Hz, 1H), 3.81 (dq, *J* = 15.8, 8.3 Hz, 1H), 2.94 (s, 6H), 2.88 (s, 6H). <sup>13</sup>C NMR (100 MHz, Chloroform-*d*) δ 197.2, 149.5, 138.2, 132.9, 132.7, 132.6, 131.3, 130.1, 129.7, 129.1, 129.0, 128.9, 128.5, 128.1, 127.7, 127.6, 127.5, 126.4, 126.3, 123.6 (q, *J* = 279.4 Hz), 120.6, 112.1, 111.8, 92.1, 89.1, 86.7, 67.4 (q, *J* = 34.5 Hz), 52.2, 40.6, 40.5. <sup>19</sup>F NMR (376 MHz, Chloroform-*d*) δ -73.17 (t, *J* = 8.5 Hz). HRMS(ESI) Calcd. for C<sub>39</sub>H<sub>35</sub>F<sub>3</sub>N<sub>2</sub>O<sub>2</sub>Na (M+Na)<sup>+</sup> 643.2543, found 643.2519.

**3,3-bis(4-(dimethylamino)phenyl)-1-phenyl-5-(thiophen-3-yl)-2-(2,2,2-trifluoroethoxy)pent-4-yn-1-one (6g)**

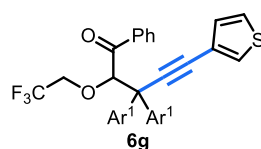

Gray-green solid, 79% yield. <sup>1</sup>H NMR (400 MHz, Chloroform-*d*) δ 7.85 (d, *J* = 7.7 Hz, 2H), 7.44 (d, *J* = 8.2 Hz, 2H), 7.41 (d, *J* = 7.3 Hz, 1H), 7.32 – 7.24 (m, 4H), 7.17 – 7.14 (m, 1H), 7.11 (s, 1H), 6.84 (d, *J* = 4.9 Hz, 1H), 6.67 (d, *J* = 8.4 Hz, 2H), 6.55 (d,

*J* = 8.4 Hz, 2H), 5.70 (s, 1H), 3.92 (dq, *J* = 12.5, 8.7 Hz, 1H), 3.78 (dq, *J* = 12.5, 8.7 Hz, 1H), 2.93 (s, 6H), 2.87 (s, 6H). <sup>13</sup>C NMR (100 MHz, Chloroform-*d*) δ 197.2, 149.4, 138.1, 132.6, 130.0, 129.9, 129.7, 129.1, 129.0, 128.9, 128.3, 128.0, 124.7, 123.6 (q, *J* = 279.5 Hz), 122.3, 112.0, 111.8, 91.1, 86.7, 84.0, 67.4 (q, *J* = 34.5 Hz), 52.1, 40.6, 40.5. <sup>19</sup>F NMR (376 MHz, Chloroform-*d*) δ -73.20 (t, *J* = 8.6 Hz). HRMS(ESI) Calcd. for C<sub>33</sub>H<sub>31</sub>F<sub>3</sub>N<sub>2</sub>O<sub>2</sub>SNa

(M+Na)<sup>+</sup> 599.1951, found 599.1922.

**3-bis(4-(dimethylamino)phenyl)-1-phenyl-2-(2,2,2-trifluoroethoxy)-5-(trimethylsilyl)pent-4-yn-1-one (6h)**

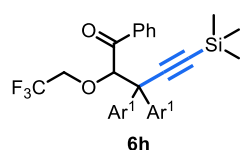

Gray-green oil, 73% yield. <sup>1</sup>H NMR (400 MHz, Chloroform-*d*)  $\delta$  7.84 (d,  $J$  = 7.7 Hz, 2H), 7.44 (t,  $J$  = 7.5 Hz, 1H), 7.38 (d,  $J$  = 8.4 Hz, 2H), 7.30 (t,  $J$  = 7.7 Hz, 2H), 7.26 (d,  $J$  = 9.8 Hz, 2H), 6.63 (d,  $J$  = 8.5 Hz, 2H), 6.55 (d,  $J$  = 8.4 Hz, 2H), 5.57 (s, 1H), 3.85 (dq,  $J$  = 13.1, 9.2 Hz, 1H), 3.74 (dq,  $J$  = 13.4, 8.6 Hz, 1H), 2.91 (s, 6H), 2.87 (s, 6H), 0.01 (s, 9H). <sup>13</sup>C NMR (100 MHz, Chloroform-*d*)  $\delta$  198.3, 150.8, 139.5, 134.1, 131.5, 131.2, 130.7, 130.4, 130.1, 129.4, 125.0 (q,  $J$  = 279.3 Hz), 113.4, 113.2, 109.0, 94.8, 88.0, 68.8 (q,  $J$  = 34.5 Hz), 53.8, 42.0, 42.0, 1.2. <sup>19</sup>F NMR (376 MHz, Chloroform-*d*)  $\delta$  -73.38 (t,  $J$  = 8.7 Hz). HRMS(ESI) Calcd. for C<sub>32</sub>H<sub>37</sub>F<sub>3</sub>N<sub>2</sub>O<sub>2</sub>SiNa (M+Na)<sup>+</sup> 589.2407, found 589.2369.

**1-(4-chlorophenyl)-3,3-bis(4-(dimethylamino)phenyl)-6,6-dimethyl-2-(2,2,2-trifluoroethoxy)hept-4-yn-1-one (6i)**

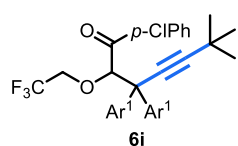

Gray-green oil, 76% yield. <sup>1</sup>H NMR (400 MHz, Chloroform-*d*)  $\delta$  7.73 (d,  $J$  = 8.2 Hz, 2H), 7.37 (d,  $J$  = 8.3 Hz, 2H), 7.29 – 7.20 (m, 4H), 6.63 (d,  $J$  = 8.5 Hz, 2H), 6.53 (d,  $J$  = 8.3 Hz, 2H), 5.44 (s, 1H), 3.89 – 3.74 (m, 2H), 2.92 (s, 6H), 2.87 (s, 6H), 1.12 (s, 9H). <sup>13</sup>C NMR (100 MHz, Chloroform-*d*)  $\delta$  196.2, 149.3, 138.8, 136.1, 130.7, 129.6, 129.5, 128.8, 128.2, 128.1, 123.6 (q,  $J$  = 277.6 Hz), 111.9, 111.7, 97.4, 87.7, 80.4, 67.5 (q,  $J$  = 34.4 Hz), 51.3, 40.6, 40.5, 30.7, 27.6. <sup>19</sup>F NMR (376 MHz, Chloroform-*d*)  $\delta$  -73.39 (t,  $J$  = 8.6 Hz). HRMS(ESI) Calcd. for C<sub>33</sub>H<sub>36</sub>ClF<sub>3</sub>N<sub>2</sub>O<sub>2</sub>Na (M+Na)<sup>+</sup> 607.2310, found 607.2287.

**1-(4-chlorophenyl)-3,3-bis(4-(dimethylamino)phenyl)-2-(2,2,2-trifluoroethoxy)non-4-yn-1-one (6j)**

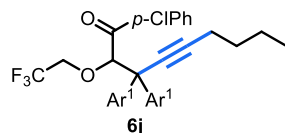

Gray-green oil, 78% yield. <sup>1</sup>H NMR (400 MHz, Chloroform-*d*)  $\delta$  7.72 (d,  $J$  = 8.2 Hz, 2H), 7.37 (d,  $J$  = 8.0 Hz, 2H), 7.25 (d,  $J$  = 8.4 Hz, 2H), 7.21 (d,  $J$  = 8.1 Hz, 2H), 6.64 (d,  $J$  = 8.4 Hz, 2H), 6.51 (d,  $J$  = 8.4 Hz, 2H), 5.46 (s, 1H), 3.93 – 3.83 (m, 1H), 3.82 – 3.72 (m, 1H), 2.92 (s, 6H), 2.87 (s, 6H), 2.10 (t,  $J$  = 6.6 Hz, 2H), 1.41 – 1.31 (m, 4H), 0.87 (t,  $J$  = 6.8 Hz, 3H). <sup>13</sup>C NMR (100 MHz, Chloroform-*d*)  $\delta$  196.4, 149.4, 138.7, 136.2, 130.6, 130.2, 129.5, 129.4, 128.9, 127.9, 123.6 (q,  $J$  = 279.7 Hz), 111.9, 111.8, 89.5, 87.9, 81.7, 67.6 (q,  $J$  = 35.4 Hz), 51.7, 40.6, 40.5, 30.7, 22.1, 18.7, 13.6. <sup>19</sup>F NMR (376 MHz, Chloroform-*d*)  $\delta$  -73.26 (t,  $J$  = 8.6 Hz). HRMS(ESI) Calcd. for C<sub>33</sub>H<sub>36</sub>ClF<sub>3</sub>N<sub>2</sub>O<sub>2</sub>Na (M+Na)<sup>+</sup> 607.2310, found 607.2281.

**5-cyclopropyl-3,3-bis(4-(dimethylamino)phenyl)-1-phenyl-2-(2,2,2-trifluoroethoxy)pent-4-yn-1-one (6k)**

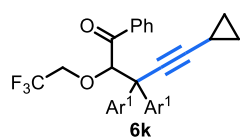

Gray-green oil, 80% yield. <sup>1</sup>H NMR (400 MHz, Chloroform-*d*)  $\delta$  7.81 (d,  $J$  = 7.8 Hz, 2H), 7.45 (t,  $J$  = 7.4 Hz, 1H), 7.36 (d,  $J$  = 8.4 Hz, 2H), 7.32 (t,  $J$  = 7.6 Hz, 2H), 7.22 (d,  $J$  = 8.3 Hz, 2H), 6.64 (d,  $J$  = 8.3 Hz, 2H), 6.54 (d,  $J$  = 8.4 Hz, 2H), 5.60 (s, 1H), 3.87 (dq,  $J$  = 13.0, 9.1 Hz, 1H), 3.73 (dq,  $J$  = 13.2, 8.2 Hz, 1H), 2.92 (s, 6H), 2.86 (s, 6H), 1.15 – 1.04 (m, 1H), 0.63 – 0.54 (m, 2H), 0.45 – 0.33 (m, 2H). <sup>13</sup>C NMR (100 MHz, Chloroform-*d*)  $\delta$  197.7, 149.7, 138.6, 132.9, 131.3, 130.1, 129.8, 129.4, 129.2, 128.3, 124.1 (q,  $J$  = 279.7 Hz), 112.4, 112.1, 92.6, 87.1, 67.7 (q,  $J$  = 34.4 Hz), 51.7, 41.0, 40.9, 8.2, 8.2, 0.1. <sup>19</sup>F NMR (376 MHz, Chloroform-*d*)  $\delta$  -73.25 (t,  $J$  = 8.5 Hz). HRMS(ESI) Calcd. for C<sub>32</sub>H<sub>33</sub>F<sub>3</sub>N<sub>2</sub>O<sub>2</sub>Na (M+Na)<sup>+</sup> 557.2386, found 557.2343.

**3,3-bis(4-(dimethylamino)phenyl)-1,5-diphenyl-2-(2,2,2-trichloroethoxy)pent-4-yn-1-one (6l)**

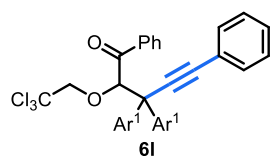

Gray-green oil, 69% yield. <sup>1</sup>H NMR (400 MHz, Chloroform-*d*)  $\delta$  7.95 (d,  $J$  = 7.8 Hz, 2H), 7.57 (d,  $J$  = 8.4 Hz, 2H), 7.45 – 7.38 (m, 3H), 7.28 (d,  $J$  = 7.5 Hz, 2H), 7.25 – 7.20 (m, 3H), 7.17 (d,  $J$  = 6.7 Hz, 2H), 6.68 (d,  $J$  = 8.3 Hz, 2H), 6.61 (d,  $J$  = 8.3 Hz, 2H), 5.81 (s, 1H), 4.18 (d,  $J$  = 11.1 Hz, 1H), 4.08 (d,  $J$  = 11.1 Hz, 1H), 2.95 (s, 6H), 2.90 (s, 6H). <sup>13</sup>C NMR (100 MHz, Chloroform-*d*)  $\delta$  197.1, 149.4, 138.0, 132.6, 131.5, 130.4, 130.1, 129.4, 129.2, 129.0, 128.0, 127.9, 123.4, 112.0, 111.7, 96.1, 92.1, 88.9, 87.8, 82.3, 52.2, 40.6, 40.6. HRMS(ESI) Calcd. for C<sub>35</sub>H<sub>33</sub>Cl<sub>3</sub>N<sub>2</sub>O<sub>2</sub>Na (M+Na)<sup>+</sup> 641.1500, found 641.1473.

**1-(4-chlorophenyl)-3,3-bis(4-(dimethylamino)phenyl)-5-phenyl-2-((3-(trifluoromethyl)benzyl)oxy)pent-4-yn-1-one (6m)**

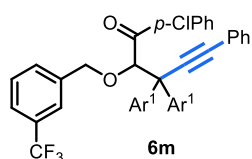

Gray-green oil, 64% yield. <sup>1</sup>H NMR (400 MHz, Chloroform-*d*)  $\delta$  7.80 (d,  $J$  = 8.1 Hz, 2H), 7.56 – 7.50 (m, 2H), 7.44 – 7.36 (m, 4H), 7.29 – 7.14 (m, 9H), 6.64 (d,  $J$  = 8.4 Hz, 2H), 6.54 (d,  $J$  = 8.4 Hz, 2H), 5.42 (s, 1H), 4.67 (d,  $J$  = 12.0 Hz, 1H), 4.55 (d,  $J$  = 12.0 Hz, 1H), 2.93 (s, 6H), 2.88 (s, 6H). <sup>13</sup>C NMR (100 MHz, Chloroform-*d*)  $\delta$  197.8, 149.5, 149.4, 138.8, 138.1, 136.3, 131.5, 131.2, 130.7 (q,  $J$  = 32.5 Hz), 130.6, 130.1, 129.5, 129.4, 128.9, 128.8, 127.9, 128.0, 128.0, 124.8 (q,  $J$  = 3.7 Hz), 124.6 (q,  $J$  = 3.7 Hz), 123.3, 111.9, 111.8, 92.1, 88.7, 87.1, 71.6, 52.1, 40.5, 40.5. <sup>19</sup>F NMR (376 MHz, Chloroform-*d*)  $\delta$  -62.50. HRMS(ESI) Calcd. for C<sub>41</sub>H<sub>36</sub>ClF<sub>3</sub>N<sub>2</sub>O<sub>2</sub>Na (M+Na)<sup>+</sup> 703.2310, found 703.2282.

**2-((4-bromobenzyl)oxy)-3,3-bis(4-(dimethylamino)phenyl)-5-(m-tolyl)-1-(3-(trifluoromethyl)phenyl)pent-4-yn-1-one (6n)**

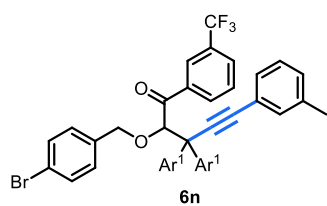

Gray-green oil, 50% yield.  $^1\text{H}$  NMR (400 MHz, Chloroform-*d*)  $\delta$  8.02 (d,  $J$  = 8.0 Hz, 1H), 7.97 (s, 1H), 7.58 (d,  $J$  = 7.8 Hz, 1H), 7.44 – 7.36 (m, 4H), 7.32 (t,  $J$  = 7.9 Hz, 1H), 7.24 (d,  $J$  = 7.8 Hz, 2H), 7.14 – 7.02 (m, 5H), 6.99 (s, 1H), 6.62 (d,  $J$  = 8.5 Hz, 2H), 6.53 (d,  $J$  = 8.5 Hz, 2H), 5.41 (s, 1H), 4.57 (d,  $J$  = 12.0 Hz, 1H), 4.49 (d,  $J$  = 12.0 Hz, 1H), 2.92 (s, 6H), 2.87 (s, 6H), 2.27 (s, 3H).  $^{13}\text{C}$  NMR (100 MHz, Chloroform-*d*)  $\delta$  198.2, 149.4, 149.3, 138.6, 137.6, 135.9, 132.3, 132.1, 131.4, 130.2 (q,  $J$  = 32.9 Hz), 130.0, 129.8, 129.5, 129.4, 129.0, 128.8, 128.6, 128.5 (q,  $J$  = 3.8 Hz), 128.3, 127.9, 126.0 (q,  $J$  = 3.9 Hz), 123.6 (q,  $J$  = 274.4 Hz), 123.0, 121.9, 111.9, 111.8, 91.5, 87.2, 71.9, 52.1, 40.5, 40.4, 21.1.  $^{19}\text{F}$  NMR (376 MHz, Chloroform-*d*)  $\delta$  -62.69. HRMS(ESI) Calcd. for  $\text{C}_{42}\text{H}_{38}\text{BrF}_3\text{N}_2\text{O}_2\text{Na}$  ( $\text{M}+\text{Na}$ ) $^+$  761.1961, found 761.1923.

**2-((4-bromobenzyl)oxy)-5-(4-chlorophenyl)-3,3-bis(4-(dimethylamino)phenyl)-1-(3-(trifluoromethyl)phenyl)pent-4-yn-1-one (6o)**

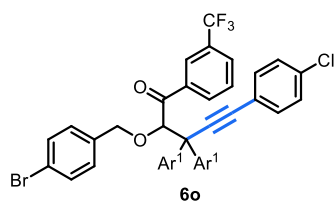

Gray-green oil, 72% yield.  $^1\text{H}$  NMR (400 MHz, Chloroform-*d*)  $\delta$  7.96 (d,  $J$  = 8.0 Hz, 1H), 7.92 (s, 1H), 7.57 (d,  $J$  = 7.9 Hz, 1H), 7.43 – 7.35 (m, 4H), 7.32 (t,  $J$  = 7.9 Hz, 1H), 7.24 – 7.15 (m, 6H), 7.08 (d,  $J$  = 8.0 Hz, 2H), 6.62 (d,  $J$  = 8.1 Hz, 2H), 6.51 (d,  $J$  = 8.1 Hz, 2H), 5.40 (s, 1H), 4.57 (d,  $J$  = 11.8 Hz, 1H), 4.49 (d,  $J$  = 11.8 Hz, 1H), 2.93 (s, 6H), 2.86 (s, 6H).  $^{13}\text{C}$  NMR (100 MHz, Chloroform-*d*)  $\delta$  198.1, 149.5, 149.4, 138.5, 135.8, 133.9, 132.8, 132.2, 131.5, 130.3 (q,  $J$  = 32.2 Hz), 129.8, 129.4, 129.2, 129.0, 128.6 (q,  $J$  = 3.8 Hz), 128.3, 125.9 (q,  $J$  = 4.1 Hz), 123.5 (q,  $J$  = 272.9 Hz), 122.0, 121.8, 111.9, 111.8, 92.9, 87.4, 86.8, 71.9, 52.1, 40.5, 40.4.  $^{19}\text{F}$  NMR (376 MHz, Chloroform-*d*)  $\delta$  -62.69. HRMS(ESI) Calcd. for  $\text{C}_{41}\text{H}_{35}\text{BrClF}_3\text{N}_2\text{O}_2\text{Na}$  ( $\text{M}+\text{Na}$ ) $^+$  781.1415, found 781.1395.

**(5,5-bis(4-(dimethylamino)phenyl)-3-phenyl-2,5-dihydrofuran-2-yl)(phenyl)methanone (8a)**

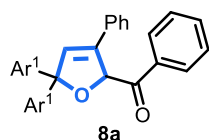

Green oil, 91% yield.  $^1\text{H}$  NMR (400 MHz, Chloroform-*d*)  $\delta$  8.09 (d,  $J$  = 7.5 Hz, 2H), 7.92 (d,  $J$  = 10.3 Hz, 1H), 7.51 (d,  $J$  = 7.5 Hz, 1H), 7.42 – 7.33 (m, 4H), 7.29 – 7.25 (m, 4H), 7.13 (d,  $J$  = 8.4 Hz, 2H), 6.79 (s, 1H), 6.70 (d,  $J$  = 8.4 Hz, 2H), 6.58 (d,  $J$  = 8.3 Hz, 2H), 6.42 (s, 1H), 2.94 (s, 6H), 2.88 (s, 6H).  $^{13}\text{C}$  NMR (100 MHz, Chloroform-*d*)  $\delta$  196.5, 149.9, 149.7, 137.3, 136.1, 133.1, 132.9, 132.2, 131.2, 129.6, 128.5, 128.4, 127.9, 127.9, 127.6, 126.5, 112.1, 112.0, 96.2, 86.4, 40.6. HRMS(ESI)

Calcd. for C<sub>33</sub>H<sub>33</sub>N<sub>2</sub>O<sub>2</sub> (M+H)<sup>+</sup> 489.2537, found 489.2519.

**(5,5-bis(4-(dimethylamino)phenyl)-3-phenyl-2,5-dihydrofuran-2-yl)(4-fluorophenyl)methanone (8b)**

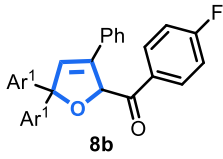 Green oil, 83% yield. <sup>1</sup>H NMR (400 MHz, Chloroform-*d*) δ 8.17 – 8.05 (m, 2H), 7.35 (d, *J* = 6.7 Hz, 2H), 7.32 – 7.22 (m, 5H), 7.12 (d, *J* = 8.0 Hz, 2H), 7.03 (t, *J* = 8.6 Hz, 2H), 6.79 (s, 1H), 6.69 (d, *J* = 7.3 Hz, 2H), 6.58 (d, *J* = 7.2 Hz, 2H), 6.35 (s, 1H), 2.93 (s, 6H), 2.89 (s, 6H). <sup>13</sup>C NMR (100 MHz, Chloroform-*d*) δ 195.2, 167.0, 165.6 (d, *J* = 255.2 Hz), 149.9, 149.8, 137.3, 133.0, 132.4, 132.4 (d, *J* = 2.4 Hz), 132.3 (d, *J* = 9.5 Hz), 132.0, 131.1, 128.5, 128.1, 127.8, 127.6, 126.5, 115.5, 115.3, 112.1, 112.0, 96.2, 87.0, 40.6. <sup>19</sup>F NMR (376 MHz, Chloroform-*d*) δ -105.16. HRMS(ESI) Calcd. for C<sub>33</sub>H<sub>32</sub>FN<sub>2</sub>O<sub>2</sub> (M+H)<sup>+</sup> 507.2442, found 507.2431.

**(5,5-bis(4-(dimethylamino)phenyl)-3-phenyl-2,5-dihydrofuran-2-yl)(4-bromophenyl)methanone (8c)**

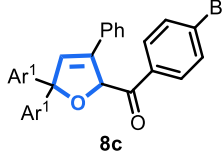 Green oil, 80% yield. <sup>1</sup>H NMR (400 MHz, Chloroform-*d*) δ 7.89 (d, *J* = 7.9 Hz, 2H), 7.47 (d, *J* = 7.6 Hz, 2H), 7.35 (d, *J* = 7.3 Hz, 2H), 7.29 (t, *J* = 6.8 Hz, 1H), 7.27 – 7.21 (m, 4H), 7.09 (d, *J* = 8.7 Hz, 2H), 6.79 (s, 1H), 6.69 (d, *J* = 8.8 Hz, 2H), 6.58 (d, *J* = 8.8 Hz, 2H), 6.32 (s, 1H). <sup>13</sup>C NMR (100 MHz, Chloroform-*d*) δ 196.1, 149.9, 149.8, 137.2, 134.8, 133.0, 132.7, 131.9, 131.6, 131.2, 131.1, 128.6, 128.1, 127.8, 127.6, 126.5, 112.1, 112.0, 96.3, 87.1, 40.6. HRMS(ESI) Calcd. for C<sub>33</sub>H<sub>32</sub>BrN<sub>2</sub>O<sub>2</sub> (M+H)<sup>+</sup> 567.1642, found 567.1621.

**(5,5-bis(4-(dimethylamino)phenyl)-3-phenyl-2,5-dihydrofuran-2-yl)(o-tolyl)methanone (8d)**

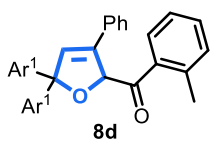 Green oil, 91% yield. <sup>1</sup>H NMR (400 MHz, Chloroform-*d*) δ 7.66 (d, *J* = 7.6 Hz, 1H), 7.37 (d, *J* = 7.1 Hz, 2H), 7.30 – 7.21 (m, 6H), 7.10 (d, *J* = 8.3 Hz, 2H), 7.06 (d, *J* = 8.4 Hz, 2H), 6.72 (s, 1H), 6.68 (d, *J* = 8.5 Hz, 2H), 6.55 (d, *J* = 8.2 Hz, 2H), 6.29 (s, 1H), 2.91 (s, 6H), 2.89 (s, 6H), 2.20 (s, 3H). <sup>13</sup>C NMR (100MHz, Chloroform-*d*) δ 201.8, 149.8, 149.7, 138.5, 137.4, 137.2, 133.2, 132.6, 132.4, 131.5, 131.3, 130.9, 128.9, 128.5, 128.1, 128.0, 127.6, 126.6, 125.1, 112.1, 112.1, 96.2, 88.6, 40.7, 40.6, 20.5. HRMS(ESI) Calcd. for C<sub>34</sub>H<sub>35</sub>N<sub>2</sub>O<sub>2</sub> (M+H)<sup>+</sup> 503.2687, found 503.2658.

**(5,5-bis(4-(dimethylamino)phenyl)-3-phenyl-2,5-dihydrofuran-2-yl)(m-tolyl)methanone (8e)**

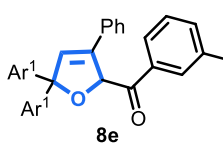 Green oil, 90% yield. <sup>1</sup>H NMR (400 MHz, Chloroform-*d*) δ 7.95 – 7.84 (m, 2H), 7.38 – 7.31 (m, 3H), 7.31 – 7.25 (m, 4H), 7.25 – 7.20 (m, 2H), 7.15 (d, *J* = 7.1 Hz, 2H), 6.79 (s, 1H), 6.70 (d, *J* = 8.1 Hz, 2H), 6.59 (d, *J* = 7.3 Hz, 2H), 6.40 (s, 1H), 2.93 (s, 6H), 2.88 (s,

6H), 2.31 (s, 3H).  $^{13}\text{C}$  NMR (100 MHz, Chloroform-*d*)  $\delta$  196.7, 149.9, 149.7, 138.1, 137.4, 136.2, 133.9, 133.2, 132.9, 132.3, 131.1, 130.0, 128.5, 128.3, 128.0, 127.9, 127.7, 126.9, 126.5, 112.2, 112.1, 96.2, 86.6, 40.7, 40.6, 21.4. HRMS(ESI) Calcd. for  $\text{C}_{34}\text{H}_{35}\text{N}_2\text{O}_2$  ( $\text{M}+\text{H}$ ) $^+$  503.2693, found 503.2681.

**(5,5-bis(4-(dimethylamino)phenyl)-3-phenyl-2,5-dihydrofuran-2-yl)(3-(trifluoromethyl)phenyl)methanone**

**(8f)**

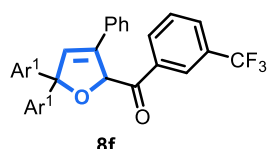

Green oil, 79% yield.  $^1\text{H}$  NMR (400 MHz, Chloroform-*d*)  $\delta$  8.29 – 8.17 (m, 2H), 7.73 (d,  $J = 7.8$  Hz, 1H), 7.46 (t,  $J = 8.1$  Hz, 1H), 7.37 (d,  $J = 7.6$  Hz, 2H), 7.33 – 7.28 (m, 2H), 7.27 – 7.21 (m, 3H), 7.07 (d,  $J = 8.3$  Hz, 2H), 6.81 (s, 1H), 6.70 (d,  $J = 8.3$  Hz, 2H), 6.55 (d,  $J = 8.3$  Hz, 2H), 6.35 (s, 1H), 2.93 (s, 6H), 2.88 (s, 6H).  $^{13}\text{C}$  NMR (100 MHz, Chloroform-*d*)  $\delta$  195.8, 149.9, 149.8, 137.1, 136.6, 132.8, 132.7, 132.6, 131.7, 131.4, 130.8 (q,  $J = 32.8$  Hz), 129.3 (q,  $J = 3.6$  Hz), 128.9, 128.6, 128.2, 127.8, 127.5, 126.5, 126.2 (q,  $J = 4.0$  Hz), 123.6 (q,  $J = 279.9$  Hz), 112.1, 112.0, 96.4, 87.0, 40.6, 40.5.  $^{19}\text{F}$  NMR (376 MHz, Chloroform-*d*)  $\delta$  -62.71. HRMS(ESI) Calcd. for  $\text{C}_{34}\text{H}_{32}\text{F}_3\text{N}_2\text{O}_2$  ( $\text{M}+\text{H}$ ) $^+$  557.2410, found 557.2391.

**(5,5-bis(4-(dimethylamino)phenyl)-3-phenyl-2,5-dihydrofuran-2-yl)(2,6-dichlorophenyl)methanone (8g)**

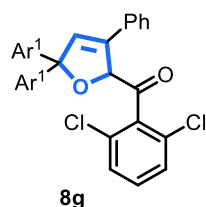

Green oil, 73% yield.  $^1\text{H}$  NMR (400 MHz, Chloroform-*d*)  $\delta$  7.52 (d,  $J = 7.5$  Hz, 2H), 7.32 (t, 2H), 7.27 (t,  $J = 6.8$  Hz, 1H), 7.16 – 7.10 (m, 3H), 6.89 (d,  $J = 8.3$  Hz, 2H), 6.86 (d,  $J = 8.6$  Hz, 1H), 6.80 (d, 1H), 6.69 (s, 1H), 6.63 (d,  $J = 8.4$  Hz, 2H), 6.47 (d,  $J = 8.3$  Hz, 2H), 6.20 (s, 1H), 2.93 (s, 6H), 2.89 (s, 6H).  $^{13}\text{C}$  NMR (101 MHz, Chloroform-*d*)  $\delta$  201.1, 149.8, 149.6, 136.1, 135.9, 135.7, 133.5, 132.0, 132.0, 131.9, 129.6, 129.4, 128.6, 128.5, 127.7, 127.2, 126.9, 125.9, 112.1, 111.7, 96.8, 90.9, 40.6, 40.6. HRMS(ESI) Calcd. for  $\text{C}_{33}\text{H}_{31}\text{Cl}_2\text{N}_2\text{O}_2$  ( $\text{M}+\text{H}$ ) $^+$  557.1684, found 557.1653.

**benzo[d][1,3]dioxol-5-yl(5,5-bis(4-(dimethylamino)phenyl)-3-phenyl-2,5-dihydrofuran-2-yl)methanone (8h)**

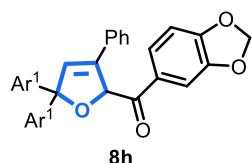

Green oil, 85% yield.  $^1\text{H}$  NMR (400 MHz, Chloroform-*d*)  $\delta$  7.80 (d,  $J = 8.1$  Hz, 1H), 7.53 (s, 1H), 7.33 (d,  $J = 7.2$  Hz, 2H), 7.30 – 7.27 (m, 2H), 7.27 – 7.19 (m, 3H), 7.15 (d,  $J = 8.7$  Hz, 2H), 6.82 – 6.75 (m, 2H), 6.70 (d,  $J = 8.5$  Hz, 2H), 6.60 (d,  $J = 8.5$  Hz, 2H), 6.35 (s, 1H), 6.00 (s, 2H), 2.93 (s, 6H), 2.89 (s, 6H).  $^{13}\text{C}$  NMR (100 MHz, Chloroform-*d*)  $\delta$  194.3, 151.8, 149.9, 149.7, 147.9, 137.4, 133.1, 132.9, 132.2, 131.0, 130.9, 128.5, 127.9, 127.9, 127.6, 126.4, 126.3, 112.1, 112.1, 109.2, 107.8, 101.7, 96.1, 86.3, 40.6. HRMS(ESI) Calcd. for  $\text{C}_{34}\text{H}_{33}\text{N}_2\text{O}_4$  ( $\text{M}+\text{H}$ ) $^+$  533.2435, found 533.2412.

**(5,5-bis(4-(dimethylamino)phenyl)-3-phenyl-2,5-dihydrofuran-2-yl)(naphthalen-2-yl)methanone (8i)**

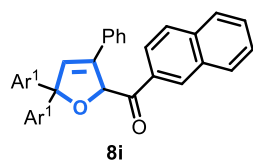

Green oil, 90% yield.  $^1\text{H}$  NMR (400 MHz, Chloroform-*d*)  $\delta$  8.69 (s, 1H), 8.05 (d,  $J$  = 7.5 Hz, 1H), 7.85 – 7.77 (m, 2H), 7.75 (d,  $J$  = 7.9 Hz, 1H), 7.53 (t,  $J$  = 8.1 Hz, 1H), 7.46 (t,  $J$  = 7.0 Hz, 1H), 7.39 (d,  $J$  = 7.3 Hz, 2H), 7.30 (d,  $J$  = 6.7 Hz, 2H), 7.26 (d, 2H), 7.22 (s, 1H), 7.21 – 7.16 (m, 2H), 6.84 (s, 1H), 6.71 (d,  $J$  = 7.8 Hz, 2H), 6.61 – 6.52 (m, 3H), 2.93 (s, 6H), 2.86 (s, 6H).  $^{13}\text{C}$  NMR (100 MHz, Chloroform-*d*)  $\delta$  196.7, 149.9, 149.7, 137.7, 135.6, 133.3, 133.2, 132.8, 132.4, 132.2, 131.8, 131.0, 130.0, 128.6, 128.4, 128.1, 128.0, 127.8, 127.7, 127.6, 126.6, 126.4, 125.0, 112.2, 96.3, 87.2, 40.6. HRMS(ESI) Calcd. for  $\text{C}_{37}\text{H}_{35}\text{N}_2\text{O}_2$  ( $\text{M}+\text{H}$ ) $^+$  539.2693, found 539.2684.

**(5,5-bis(4-(dimethylamino)phenyl)-3-phenyl-2,5-dihydrofuran-2-yl)(furan-2-yl)methanone (8j)**

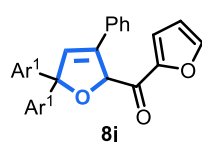

Green oil, 76% yield.  $^1\text{H}$  NMR (400 MHz, Chloroform-*d*)  $\delta$  7.80 – 7.65 (m, 1H), 7.52 (s, 1H), 7.37 (d,  $J$  = 7.3 Hz, 2H), 7.26 – 7.13 (m, 6H), 7.06 – 6.99 (m, 1H), 6.78 (s, 1H), 6.74 – 6.61 (m, 4H), 6.39 (s, 1H), 6.22 (s, 1H), 2.91 (s, 12H).  $^{13}\text{C}$  NMR (100 MHz, Chloroform-*d*)  $\delta$  185.5, 151.3, 149.8, 149.8, 147.1, 137.3, 133.1, 132.4, 132.2, 131.4, 128.5, 128.1, 128.1, 127.4, 126.5, 120.5, 112.2, 112.1, 96.3, 86.9, 40.7. HRMS(ESI) Calcd. for  $\text{C}_{31}\text{H}_{31}\text{N}_2\text{O}_3$  ( $\text{M}+\text{H}$ ) $^+$  479.2329, found 479.2314.

**(3-(3-chlorophenyl)-5,5-bis(4-(dimethylamino)phenyl)-2,5-dihydrofuran-2-yl)(phenyl)methanone (8k)**

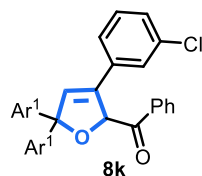

Green oil, 87% yield.  $^1\text{H}$  NMR (400 MHz, Chloroform-*d*)  $\delta$  8.09 (d,  $J$  = 7.4 Hz, 2H), 7.53 (t,  $J$  = 7.4 Hz, 1H), 7.44 – 7.36 (m, 3H), 7.27 (d,  $J$  = 7.4 Hz, 2H), 7.21 – 7.14 (m, 3H), 7.10 (d,  $J$  = 7.1 Hz, 2H), 6.80 (s, 1H), 6.70 (d,  $J$  = 7.5 Hz, 2H), 6.57 (d,  $J$  = 7.4 Hz, 2H), 6.39 (s, 1H), 2.94 (s, 6H), 2.88 (s, 6H).  $^{13}\text{C}$  NMR (100 MHz, Chloroform-*d*)  $\delta$  196.1, 149.9, 149.8, 136.1, 135.9, 134.9, 134.4, 133.2, 132.7, 132.6, 131.8, 129.8, 129.6, 128.4, 127.9, 127.8, 127.6, 126.6, 124.6, 112.1, 112.0, 96.2, 86.2, 40.6. HRMS(ESI) Calcd. for  $\text{C}_{33}\text{H}_{32}\text{ClN}_2\text{O}_2$  ( $\text{M}+\text{H}$ ) $^+$  523.2147, found 523.2134.

**(5,5-bis(4-(dimethylamino)phenyl)-3-(4-(trifluoromethyl)phenyl)-2,5-dihydrofuran-2-yl)(phenyl)methanone (8l)**

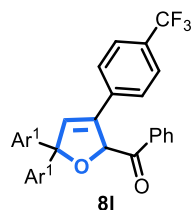

Green oil, 82% yield.  $^1\text{H}$  NMR (400 MHz, Chloroform-*d*)  $\delta$  8.10 (d,  $J$  = 6.9 Hz, 2H), 7.56 – 7.50 (m, 3H), 7.46 – 7.38 (m, 4H), 7.28 (d,  $J$  = 7.7 Hz, 2H), 7.10 (d,  $J$  = 7.6 Hz, 2H), 6.88 (s, 1H), 6.71 (d,  $J$  = 7.5 Hz, 2H), 6.57 (d,  $J$  = 7.4 Hz, 2H), 6.44 (s, 1H), 2.94 (s, 6H), 2.88 (s, 6H).  $^{13}\text{C}$  NMR (100 MHz, Chloroform-*d*)  $\delta$  196.1, 150.0, 149.8, 136.6, 136.1, 135.8, 133.6, 133.3,



132.4, 131.6, 129.7 (q,  $J = 30.8$  Hz), 128.5, 127.9, 127.6, 126.7, 125.5 (q,  $J = 3.9$  Hz), 124.1 (q,  $J = 280.0$  Hz), 112.1, 112.0, 96.3, 86.1, 40.6.  $^{19}\text{F}$  NMR (376 MHz, Chloroform-*d*)  $\delta$  -62.61. HRMS(ESI) Calcd. for  $\text{C}_{34}\text{H}_{32}\text{F}_3\text{N}_2\text{O}_2$  ( $\text{M}+\text{H}$ ) $^+$  557.2410, found 557.2398.

**(5,5-bis(4-(dimethylamino)phenyl)-3-(4-methoxyphenyl)-2,5-dihydrofuran-2-yl)(4-fluorophenyl)methanone**

**(8m)**

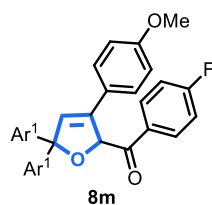

Light green solid, 86% yield.  $^1\text{H}$  NMR (400 MHz, Chloroform-*d*)  $\delta$  8.06 – 7.94 (m, 2H), 7.24 – 7.14 (m, 4H), 7.03 (d,  $J = 7.1$  Hz, 2H), 6.90 (t,  $J = 7.7$  Hz, 2H), 6.72 (d,  $J = 7.2$  Hz, 2H), 6.60 (d,  $J = 9.0$  Hz, 3H), 6.49 (d,  $J = 7.3$  Hz, 2H), 6.20 (s, 1H), 3.67 (s, 3H), 2.83 (s, 6H), 2.80 (s, 6H).  $^{13}\text{C}$  NMR (100 MHz, Chloroform-*d*)  $\delta$  195.5, 165.6 (d,  $J = 257.2$  Hz), 159.4, 149.9, 149.7, 136.9, 133.3, 132.5 (d,  $J = 3.0$  Hz), 132.3 (d,  $J = 9.2$  Hz), 132.2, 129.1, 127.8, 127.5, 125.4, 115.3 (d,  $J = 22.3$  Hz), 114.0, 112.1, 112.0, 96.2, 87.3, 55.3, 40.6.  $^{19}\text{F}$  NMR (376 MHz, Chloroform-*d*)  $\delta$  -105.61. HRMS(ESI) Calcd. for  $\text{C}_{34}\text{H}_{34}\text{FN}_2\text{O}_3$  ( $\text{M}+\text{H}$ ) $^+$  537.2548, found 537.2521.

**(5,5-bis(4-(dimethylamino)phenyl)-3-(naphthalen-1-yl)-2,5-dihydrofuran-2-yl)(phenyl)methanone (8n)**

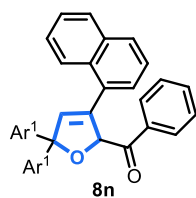

Green oil, 89% yield.  $^1\text{H}$  NMR (400 MHz, Chloroform-*d*)  $\delta$  8.03 (d,  $J = 7.7$  Hz, 2H), 7.68 (d,  $J = 6.5$  Hz, 2H), 7.60 (d,  $J = 5.9$  Hz, 1H), 7.57 – 7.51 (m, 2H), 7.44 (t,  $J = 7.7$  Hz, 1H), 7.35 – 7.31 (m, 3H), 7.23 (d,  $J = 8.0$  Hz, 2H), 7.17 (s, 1H), 7.09 (d,  $J = 8.0$  Hz, 2H), 6.84 (s, 1H), 6.63 (d,  $J = 8.2$  Hz, 2H), 6.52 (d,  $J = 8.2$  Hz, 2H), 6.46 (s, 1H), 2.86 (s, 6H), 2.81 (s, 6H).  $^{13}\text{C}$  NMR (100 MHz, Chloroform-*d*)  $\delta$  196.6, 149.9, 149.7, 137.3, 136.2, 133.3, 133.1, 132.9, 132.1, 131.8, 130.3, 129.6, 128.4, 128.2, 128.2, 127.9, 127.7, 127.6, 126.3, 126.1, 125.5, 124.5, 112.1, 112.1, 96.3, 86.6, 40.6. HRMS(ESI) Calcd. for  $\text{C}_{37}\text{H}_{35}\text{N}_2\text{O}_2$  ( $\text{M}+\text{H}$ ) $^+$  539.2693, found 539.2667.

**(5,5-bis(4-(dimethylamino)phenyl)-3-(ferrocene)-2,5-dihydrofuran-2-yl)(phenyl)methanone (8o)**

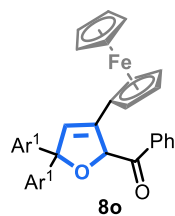

Red oil, 85% yield.  $^1\text{H}$  NMR (400 MHz, Chloroform-*d*)  $\delta$  8.10 (d,  $J = 7.63$  Hz, 2H), 7.49 (t,  $J = 8.00$  Hz, 1H), 7.36 (d,  $J = 8.75$  Hz, 2H), 7.24 (d,  $J = 8.13$  Hz, 2H), 7.16 (d,  $J = 8.82$  Hz, 2H), 6.70 (d,  $J = 7.62$  Hz, 2H), 6.60 (d,  $J = 7.64$  Hz, 2H), 6.47 (s, 1H), 6.12 (s, 1H), 4.47 (s, 1H), 4.22 (s, 1H), 4.14 (s, 1H), 4.12 (s, 1H), 4.09 – 4.01 (m, 5H), 2.93 (s, 6H), 2.88 (s, 6H).  $^{13}\text{C}$  NMR (100 MHz, Chloroform-*d*)  $\delta$  197.5, 149.8, 149.7, 136.4, 136.1, 133.6, 133.1, 132.2, 129.7, 128.3, 128.0, 127.9, 127.5, 112.2, 112.1, 96.0, 87.9, 69.4, 69.0, 68.9, 67.6, 67.2, 40.7, 40.7. HRMS(ESI) Calcd. for  $\text{C}_{37}\text{H}_{37}\text{FeN}_2\text{O}_2$  ( $\text{M}+\text{H}$ ) $^+$  597.2199, found 597.2174.

**(5,5-bis(4-(dimethylamino)phenyl)-3-(ferrocene)-2,5-dihydrofuran-2-yl)(3-methoxyphenyl)methanone (8p)**

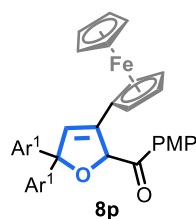

Red oil, 84% yield.  $^1\text{H}$  NMR (400 MHz, Chloroform-*d*)  $\delta$  8.12 (d,  $J$  = 8.7 Hz, 2H), 7.26 (d,  $J$  = 8.6 Hz, 2H), 7.19 (d,  $J$  = 8.6 Hz, 2H), 6.83 (d,  $J$  = 8.7 Hz, 2H), 6.70 (d,  $J$  = 8.6 Hz, 2H), 6.62 (d,  $J$  = 8.6 Hz, 2H), 6.45 (d,  $J$  = 2.3 Hz, 1H), 6.10 (d,  $J$  = 2.1 Hz, 1H), 4.46 (s, 1H), 4.20 (s, 1H), 4.16 – 4.10 (m, 2H), 4.09 – 4.00 (m, 5H), 3.8 (s, 3H), 2.9 (s, 6H), 2.9 (s, 6H).  $^{13}\text{C}$

NMR (100 MHz, Chloroform-*d*)  $\delta$  195.8, 163.5, 149.8, 149.7, 136.7, 133.7, 132.3, 132.1, 129.2, 128.0, 127.7, 127.4, 113.5, 112.2, 112.1, 95.9, 87.8, 69.4, 69.0, 68.9, 67.5, 67.2, 55.4, 40.7, 40.7. HRMS(ESI) Calcd. for  $\text{C}_{38}\text{H}_{39}\text{FeN}_2\text{O}_3$  ( $\text{M}+\text{H}$ ) $^+$  627.2305, found: 627.2279.

<sup>a</sup>Ar<sup>1</sup> = *p*-(*N,N*-dimethylamino) phenyl.

## NMR Spectra of Compounds

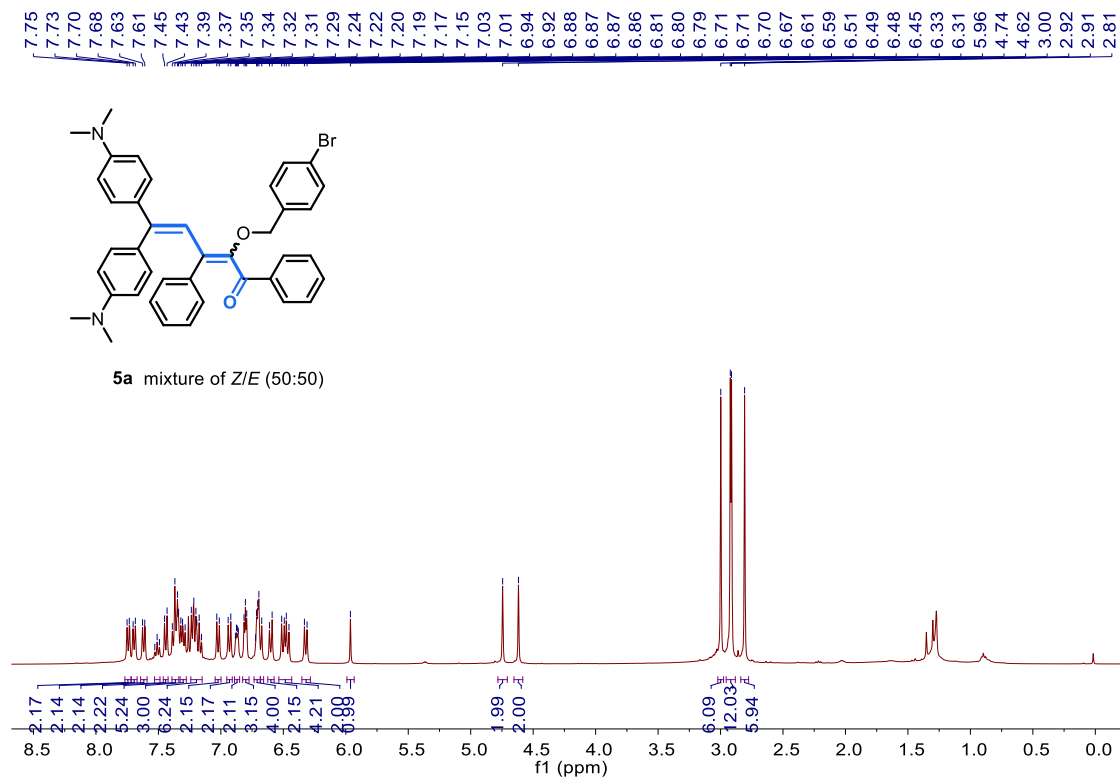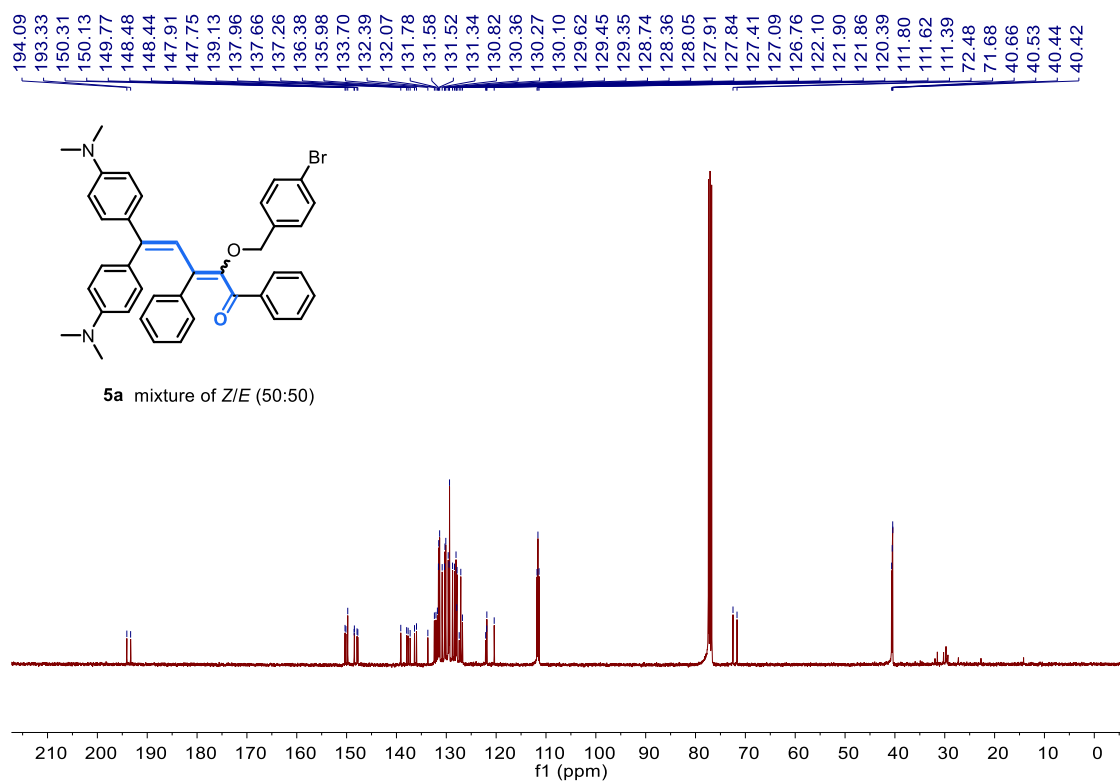

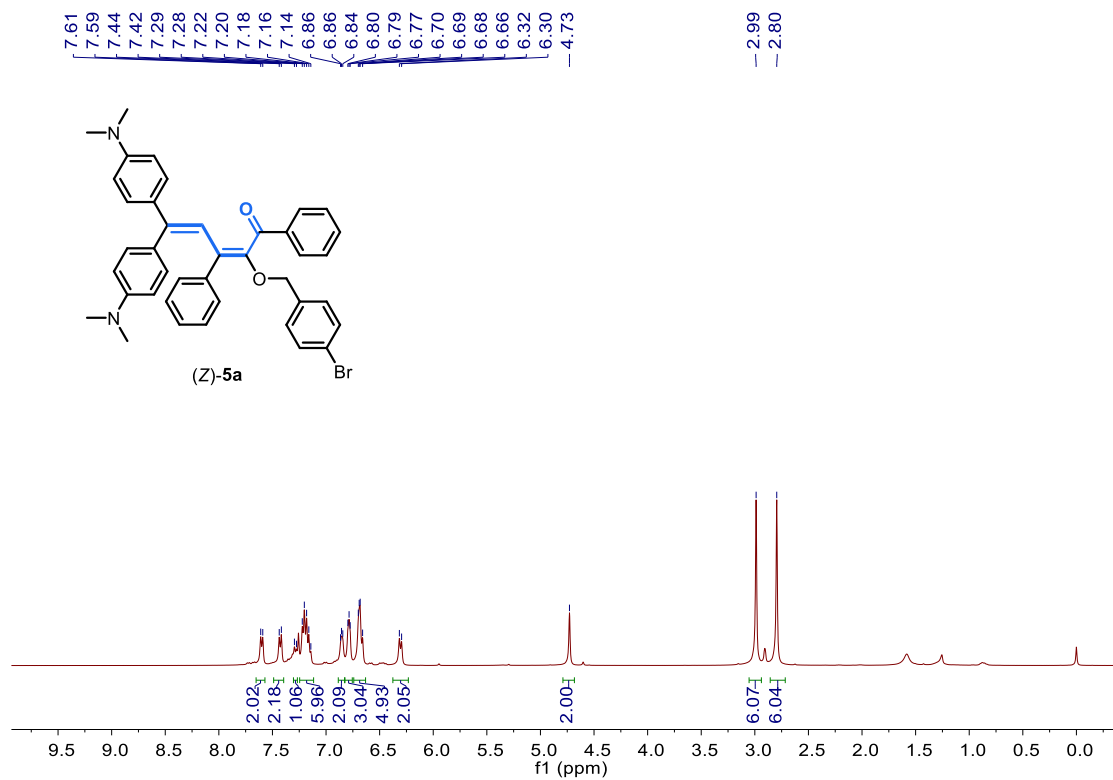

<sup>1</sup>H NMR Spectrum of Compound (Z)-5a (400MHz, CDCl<sub>3</sub>)

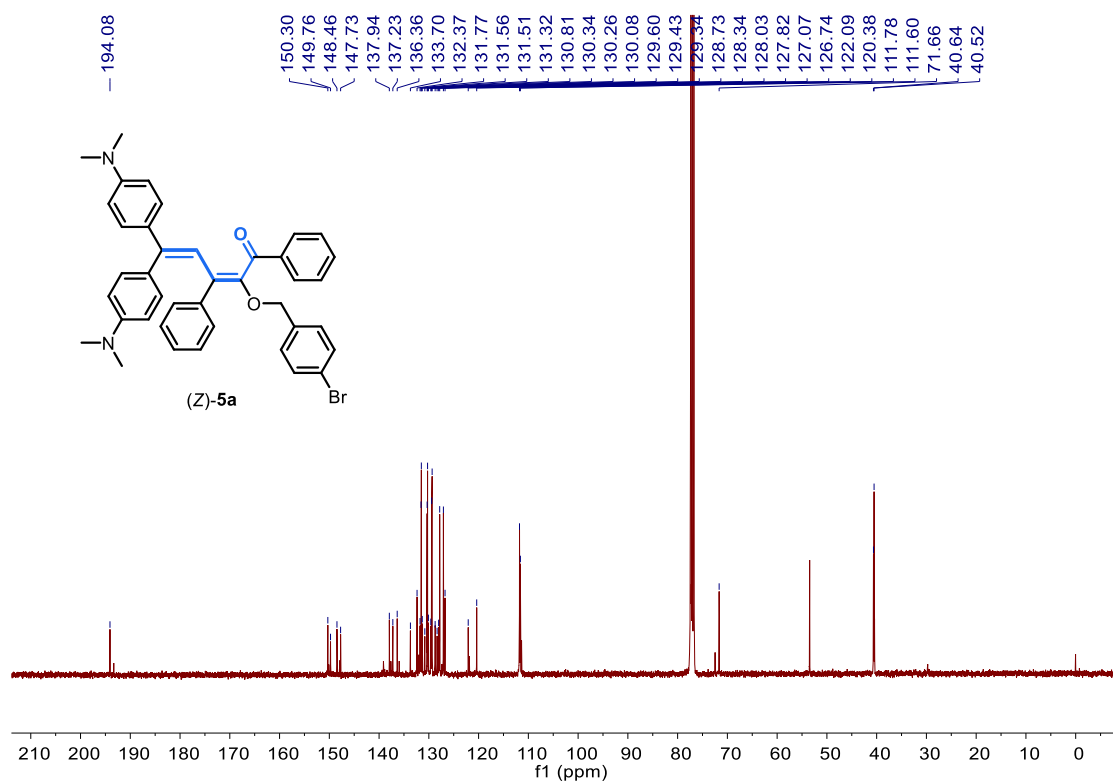

<sup>13</sup>C NMR Spectrum of Compound (Z)-5a (100MHz, CDCl<sub>3</sub>)

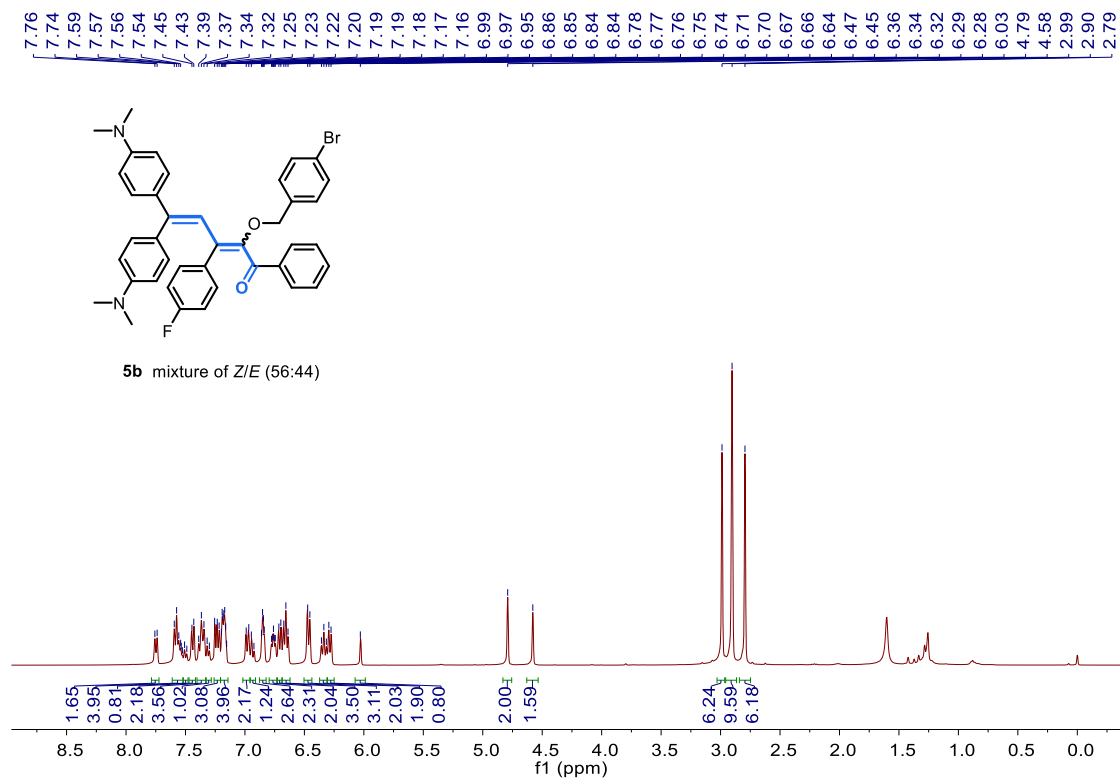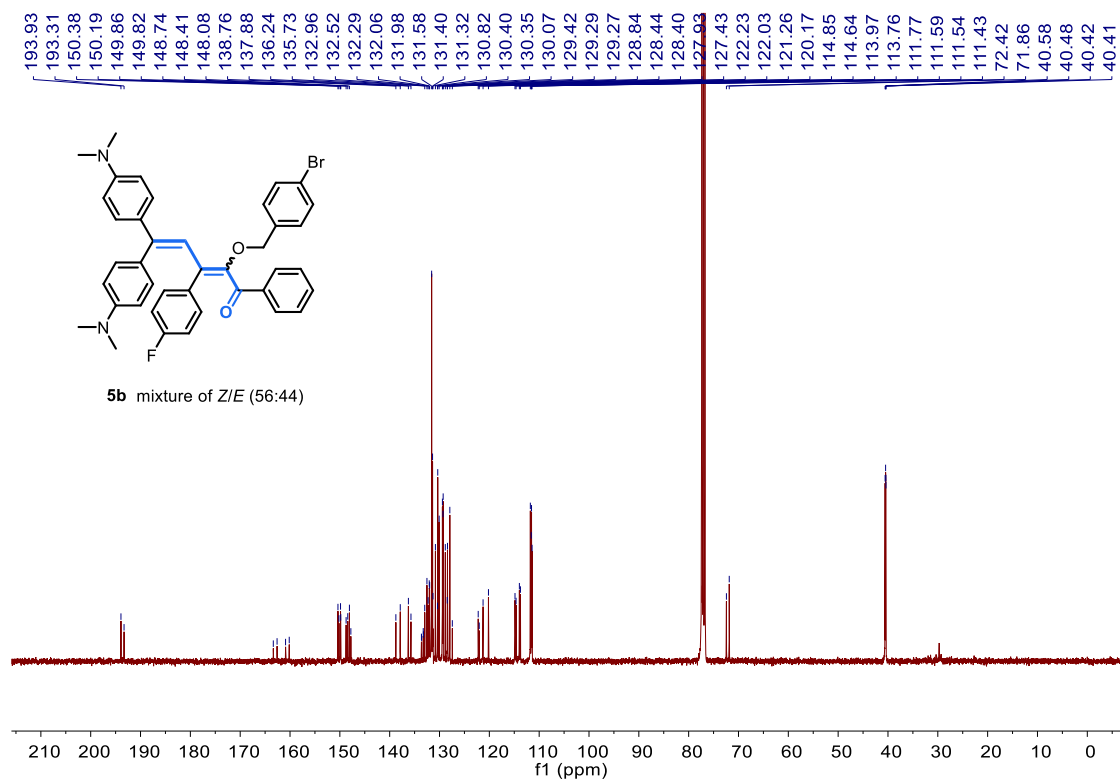

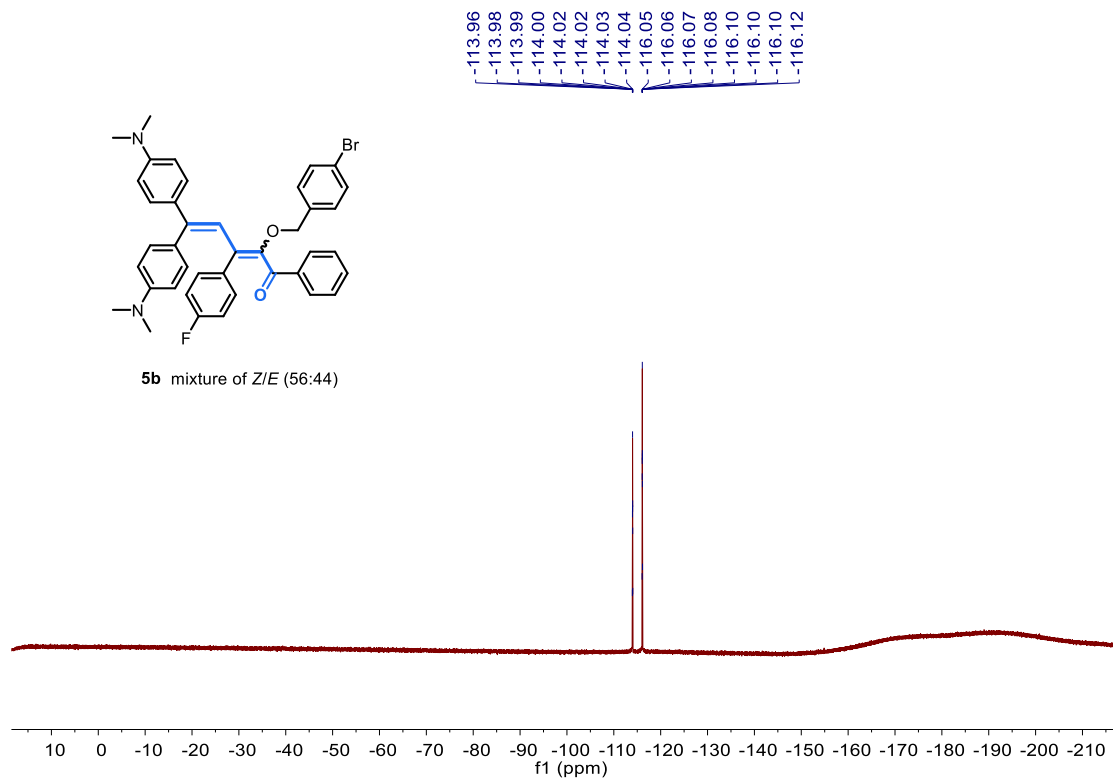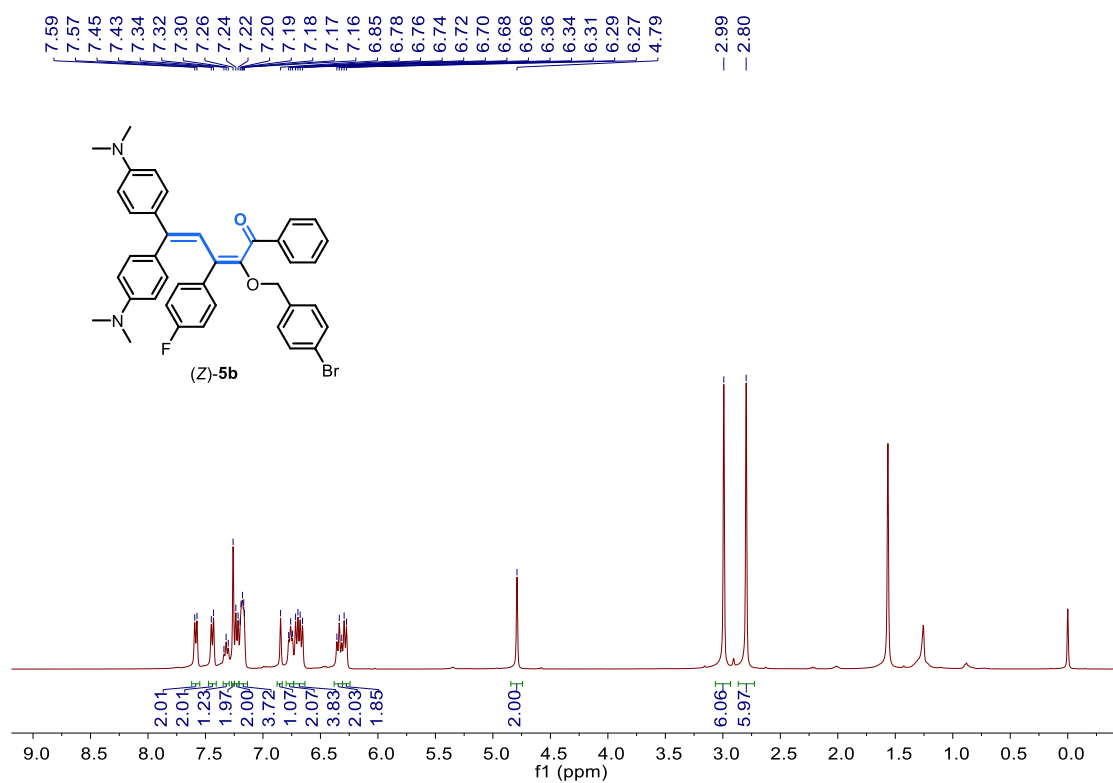

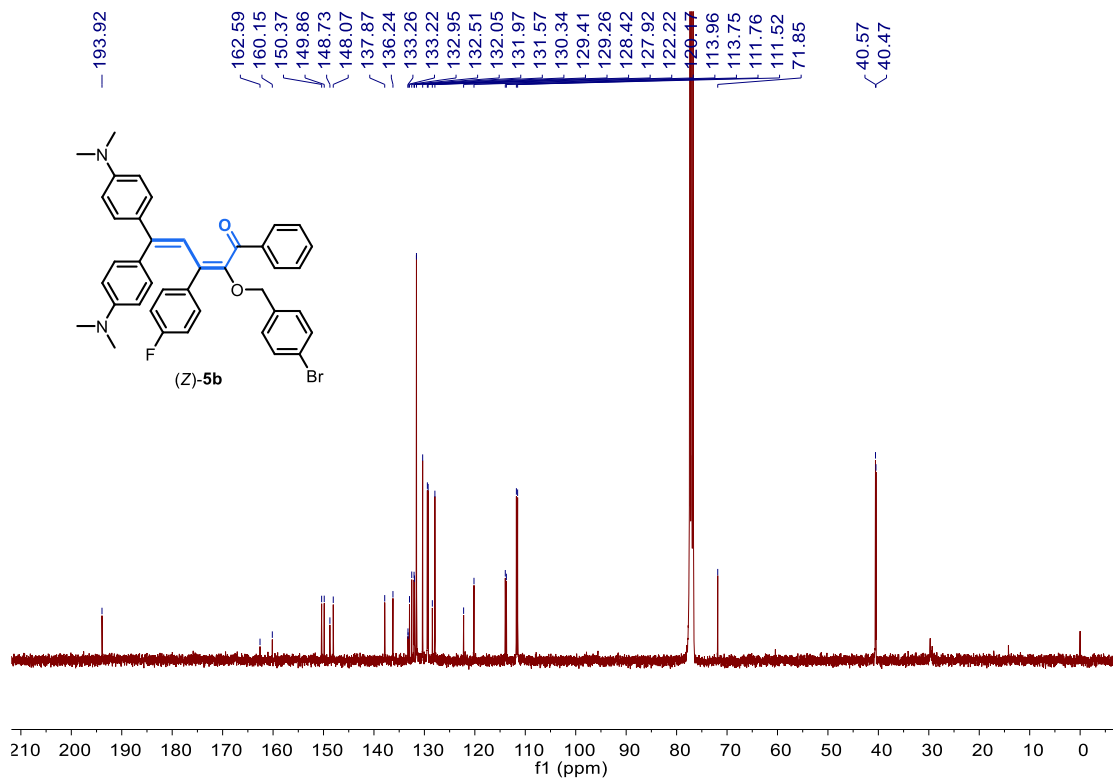

<sup>13</sup>C NMR Spectrum of Compound (Z)-5b (100MHz, CDCl<sub>3</sub>)

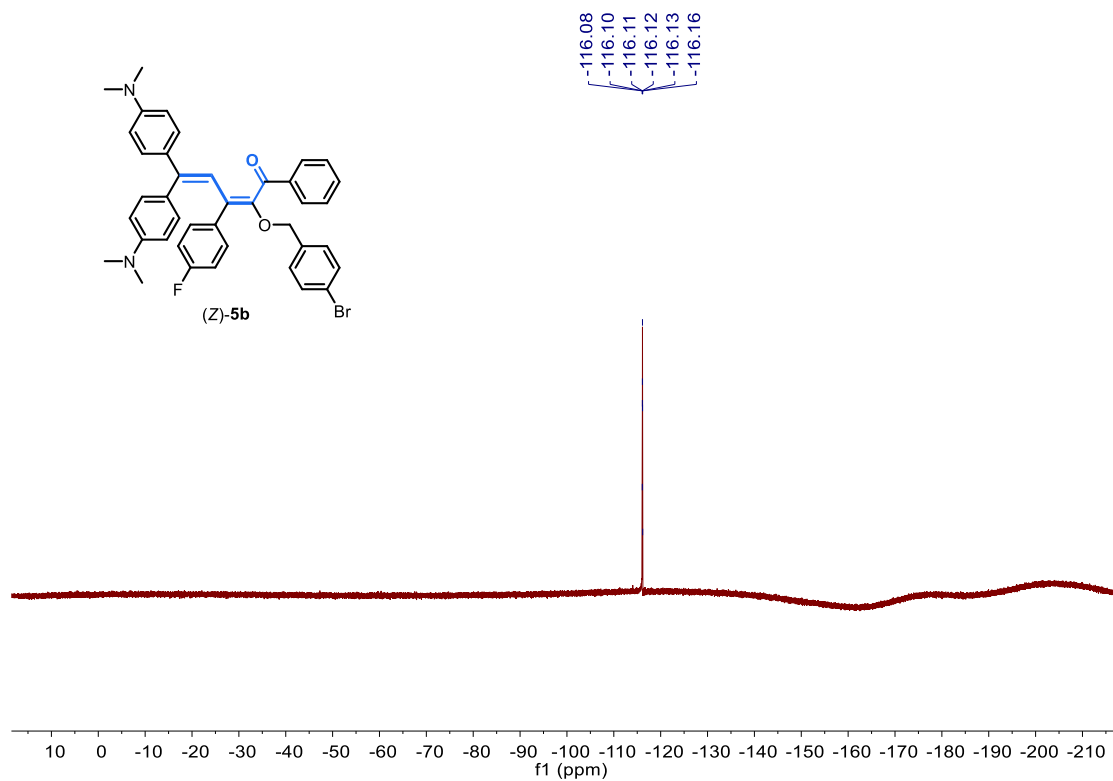

<sup>19</sup>F NMR Spectrum of Compound (Z)-5b (376 MHz, CDCl<sub>3</sub>)

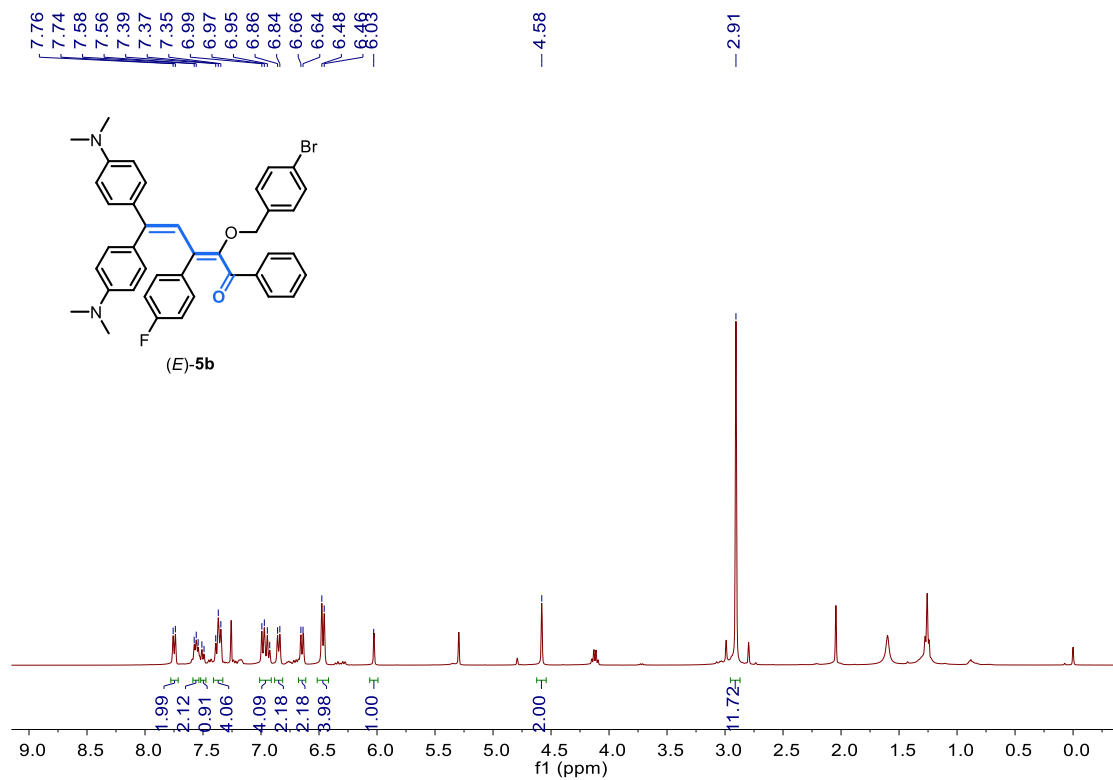

<sup>1</sup>H NMR Spectrum of Compound (E)-5b (400MHz, CDCl<sub>3</sub>)

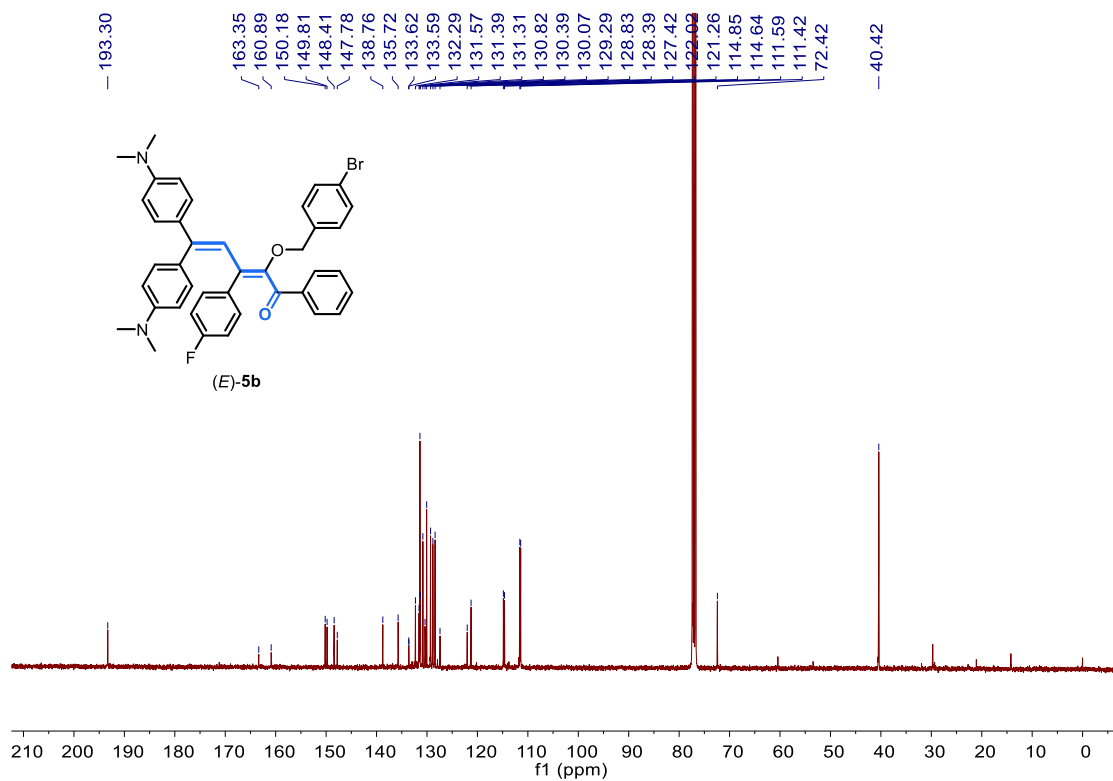

<sup>13</sup>C NMR Spectrum of Compound (E)-5b (100MHz, CDCl<sub>3</sub>)



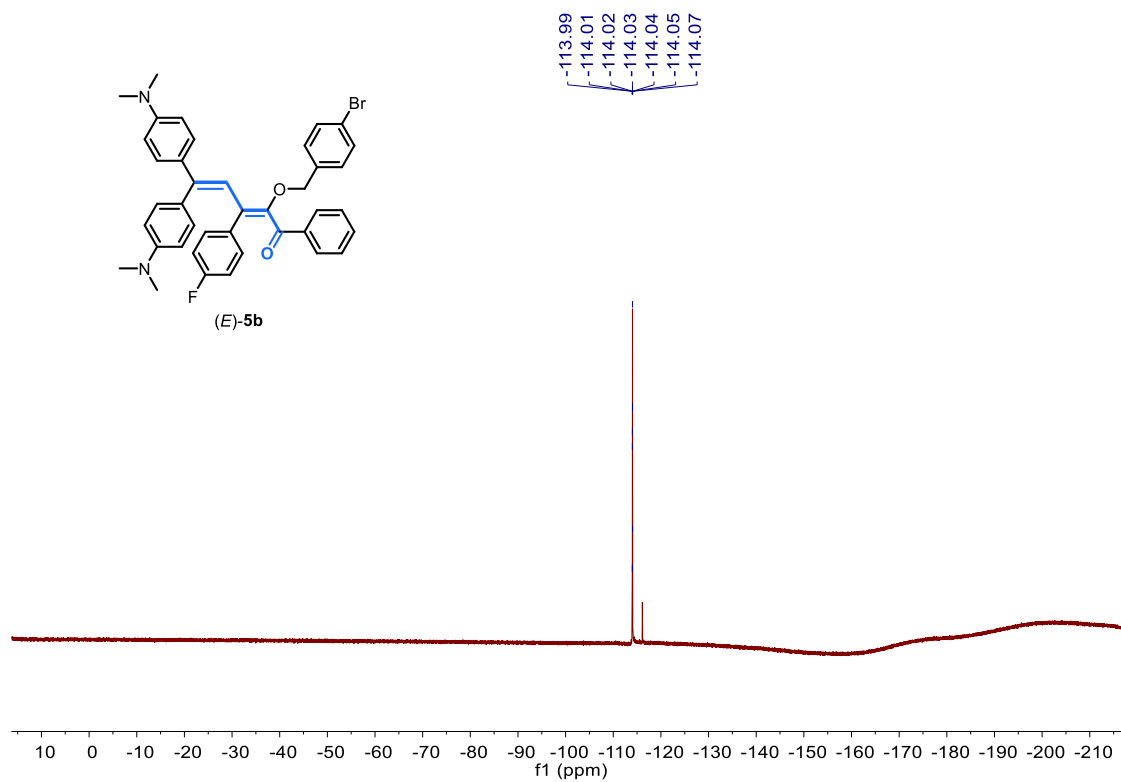

<sup>19</sup>F NMR Spectrum of Compound (E)-5b (376 MHz, CDCl<sub>3</sub>)

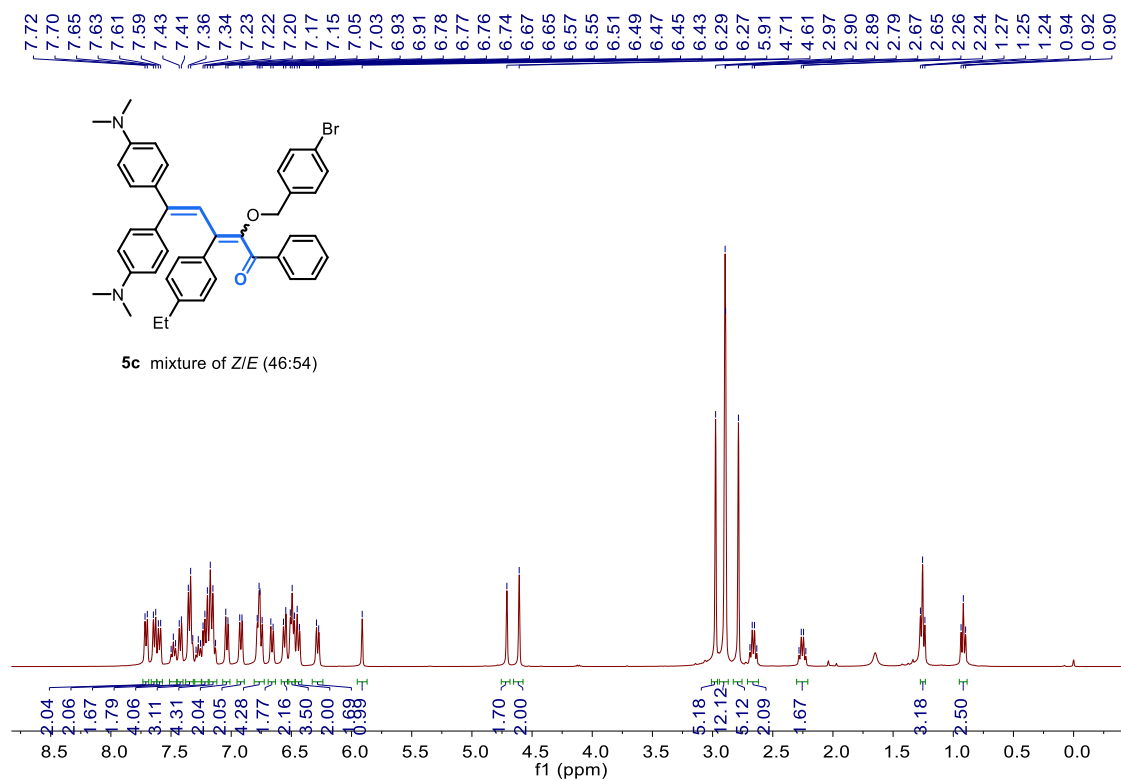

<sup>1</sup>H NMR Spectrum of Compound 5c isomers mixture (400MHz, CDCl<sub>3</sub>)

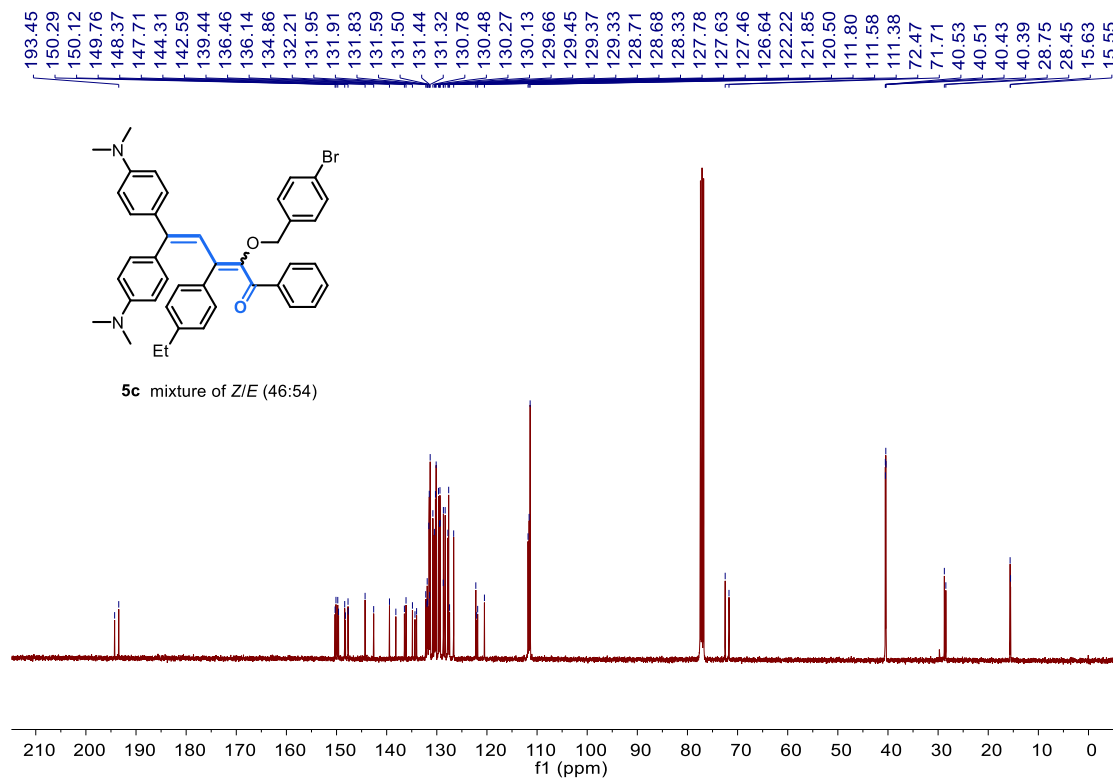

<sup>13</sup>C NMR Spectrum of Compound **5c** isomers mixture (100MHz, CDCl<sub>3</sub>)

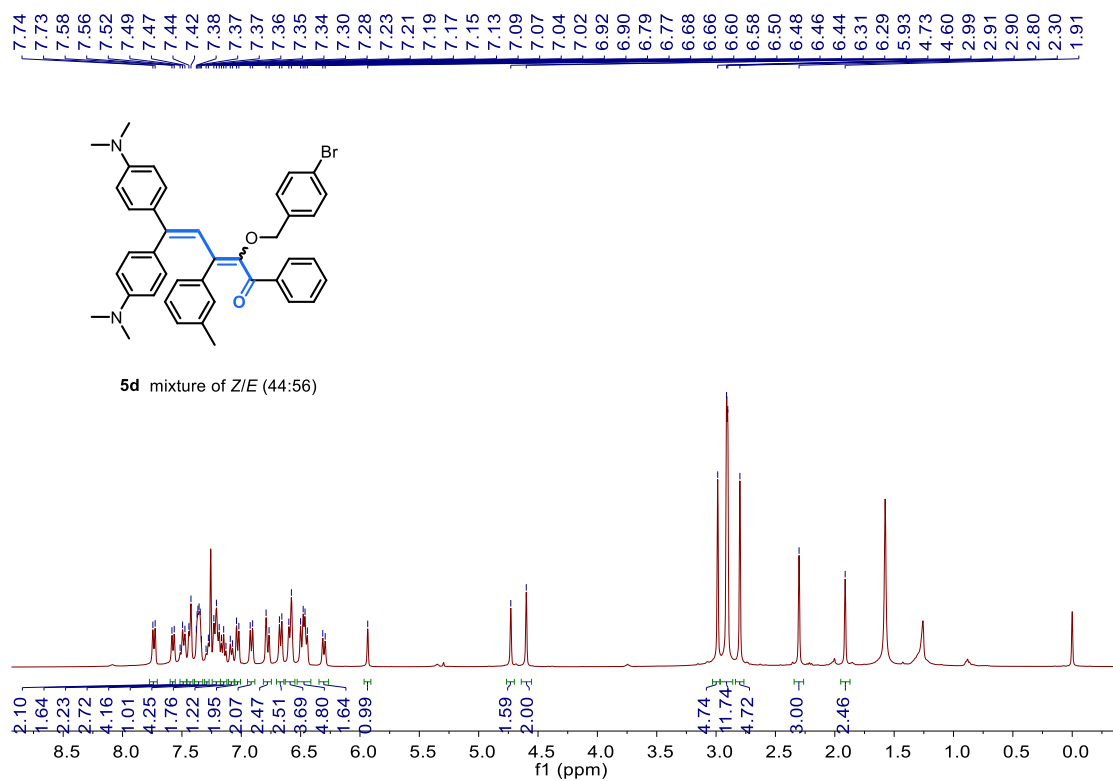

<sup>1</sup>H NMR Spectrum of Compound **5d** isomers mixture (400MHz, CDCl<sub>3</sub>)

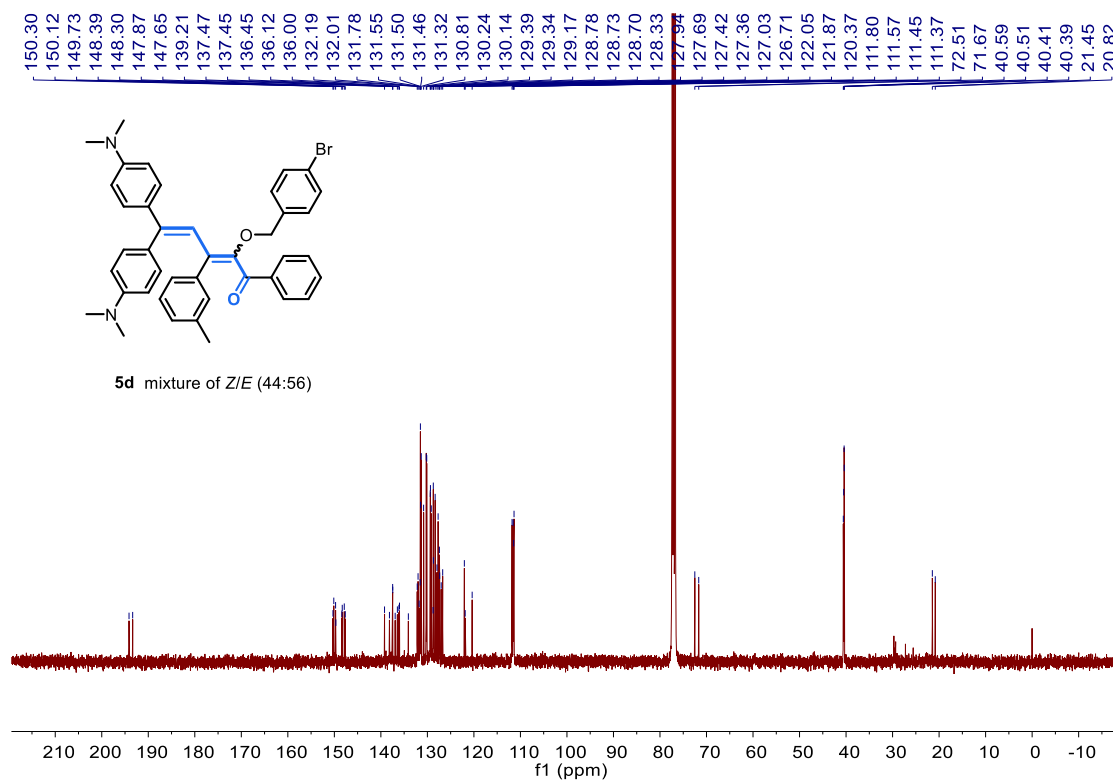

5d mixture of Z/E (44:56)

<sup>13</sup>C NMR Spectrum of Compound 5d isomers mixture (100MHz, CDCl<sub>3</sub>)

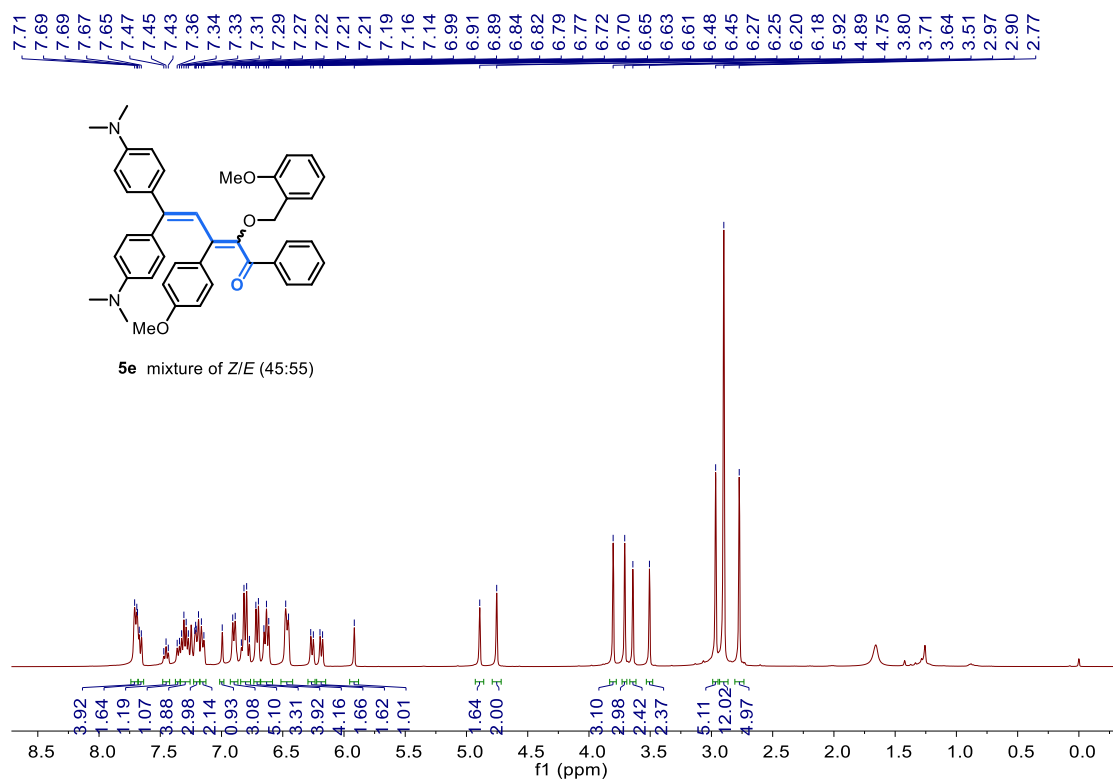

5e mixture of Z/E (45:55)

<sup>1</sup>H NMR Spectrum of Compound 5e isomers mixture (400MHz, CDCl<sub>3</sub>)

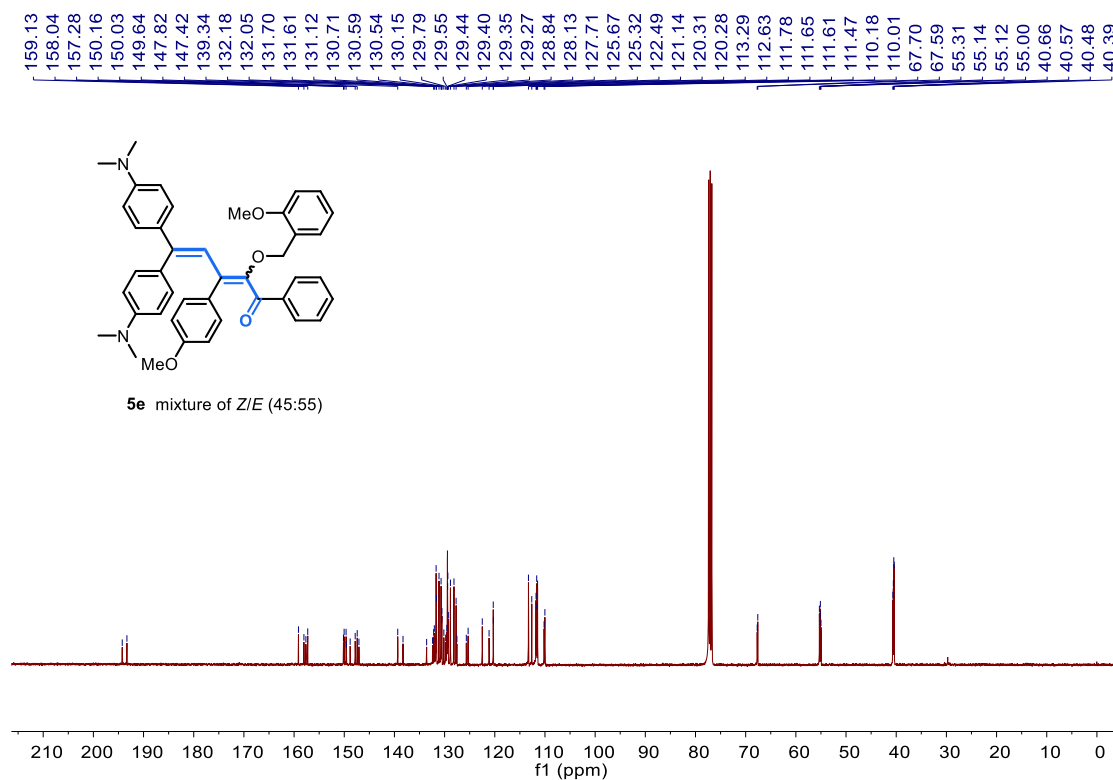

<sup>13</sup>C NMR Spectrum of Compound **5e** isomers mixture (100MHz, CDCl<sub>3</sub>)

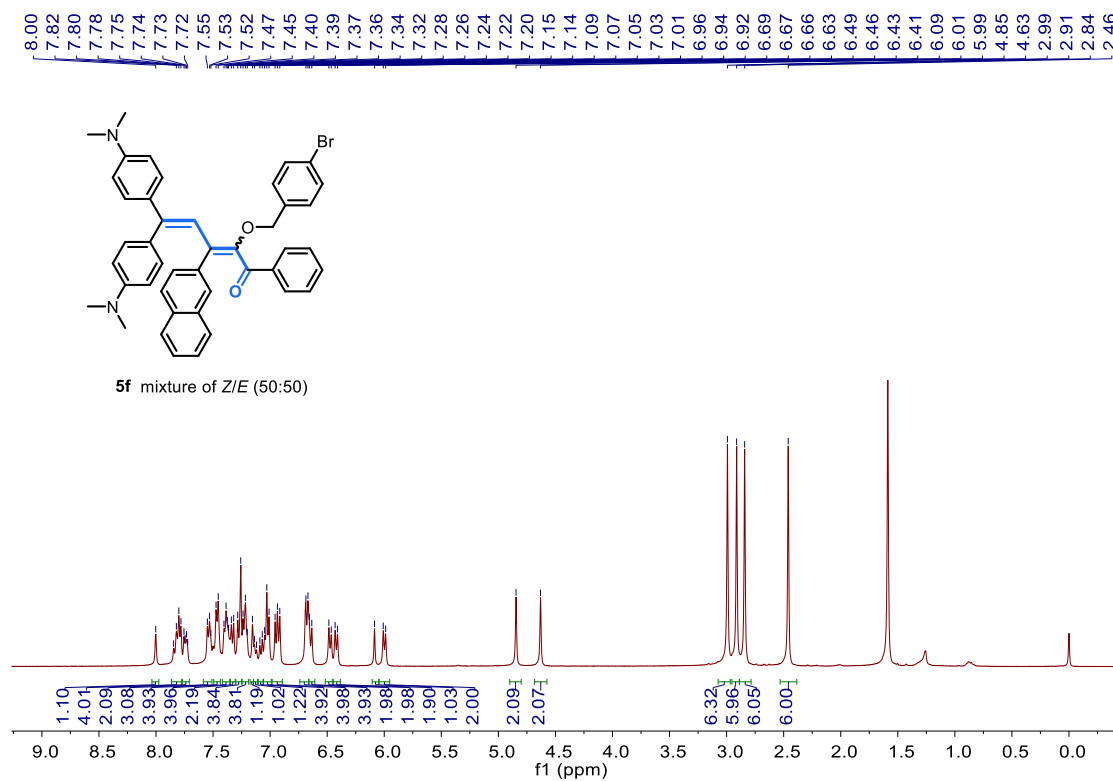

<sup>1</sup>H NMR Spectrum of Compound **5f** isomers mixture (400MHz, CDCl<sub>3</sub>)

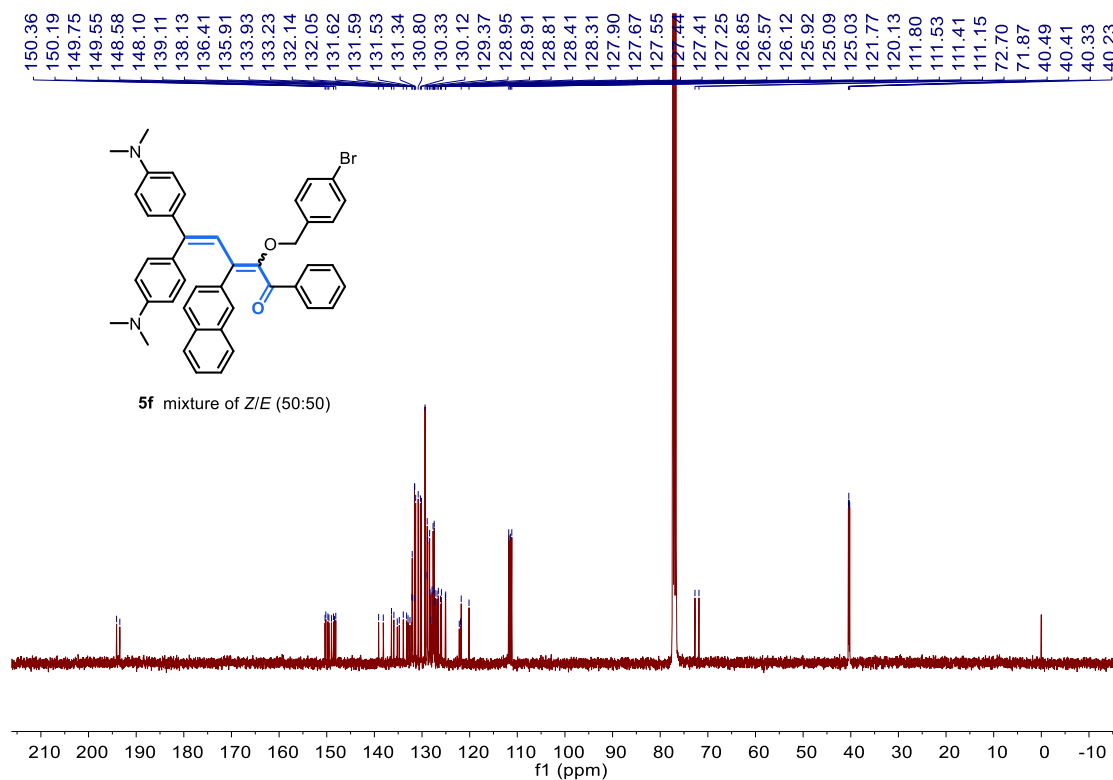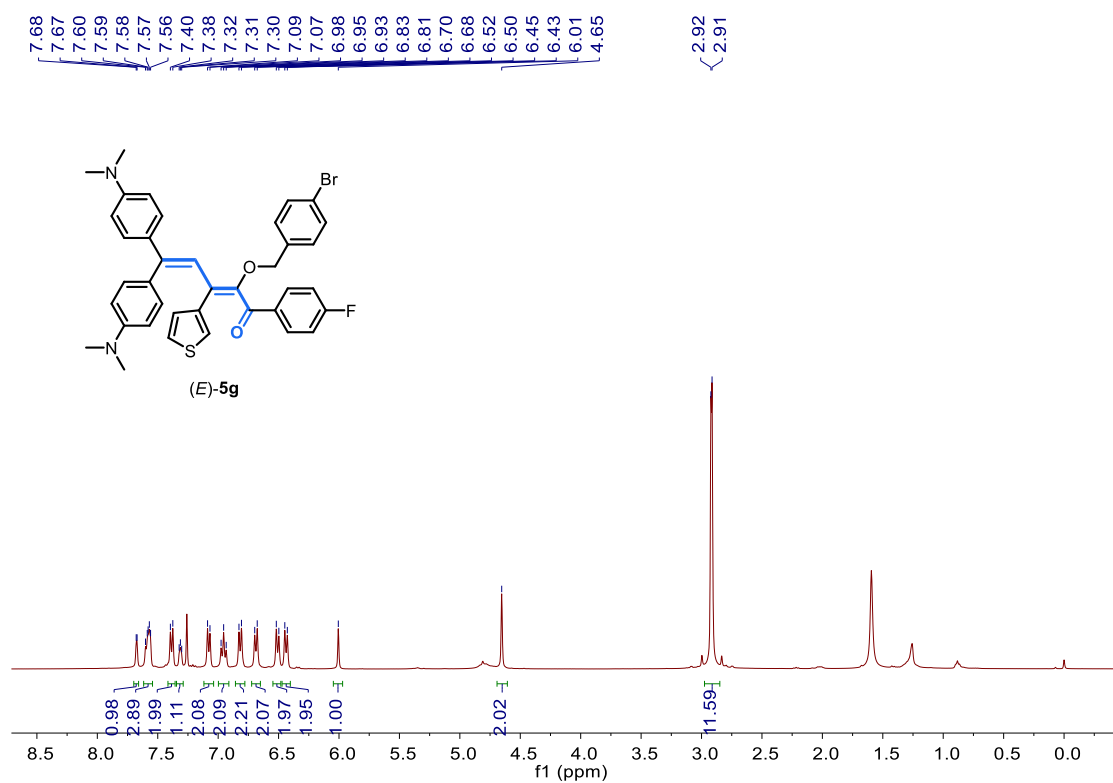

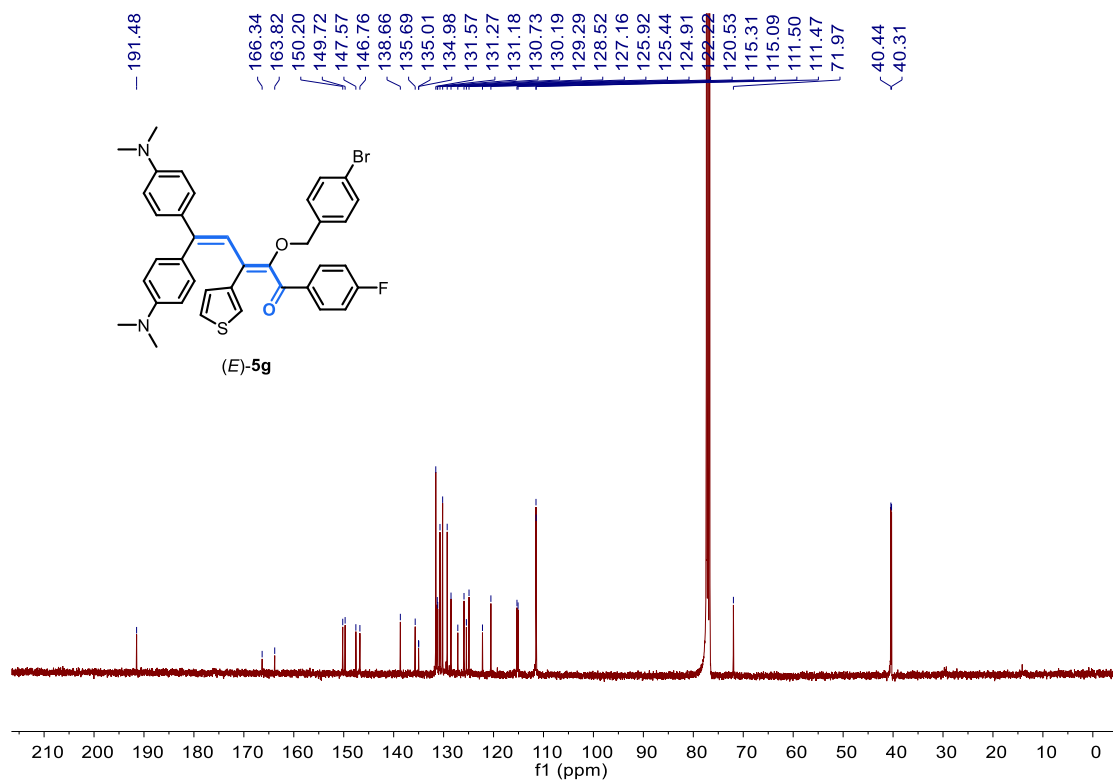

<sup>13</sup>C NMR Spectrum of Compound (E)-5g (100MHz, CDCl<sub>3</sub>)

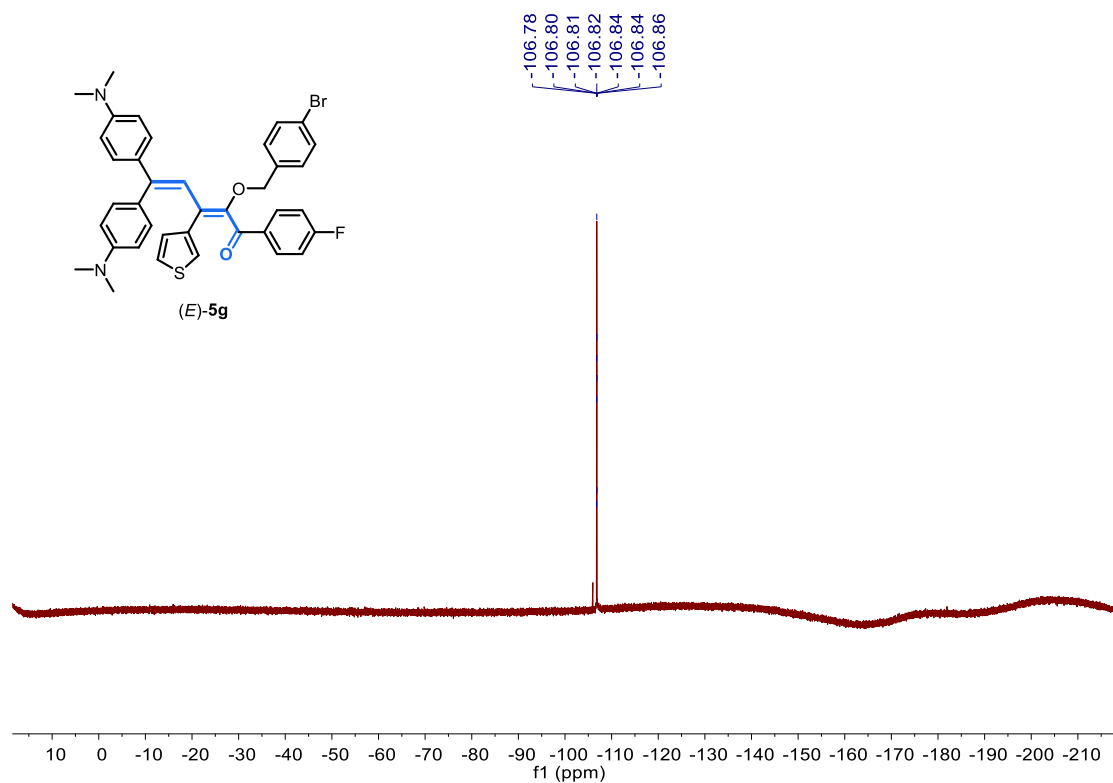

<sup>19</sup>F NMR Spectrum of Compound (E)-5g (376 MHz, CDCl<sub>3</sub>)

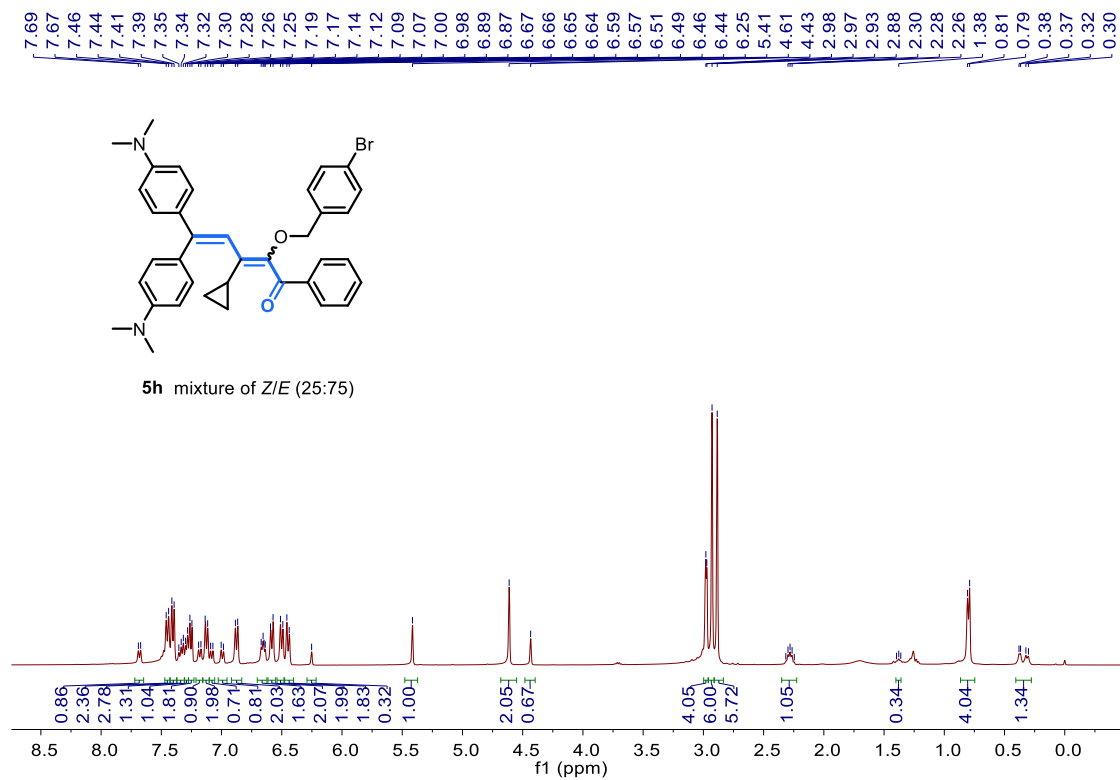

<sup>1</sup>H NMR Spectrum of Compound **5h** isomers mixture (400MHz, CDCl<sub>3</sub>)

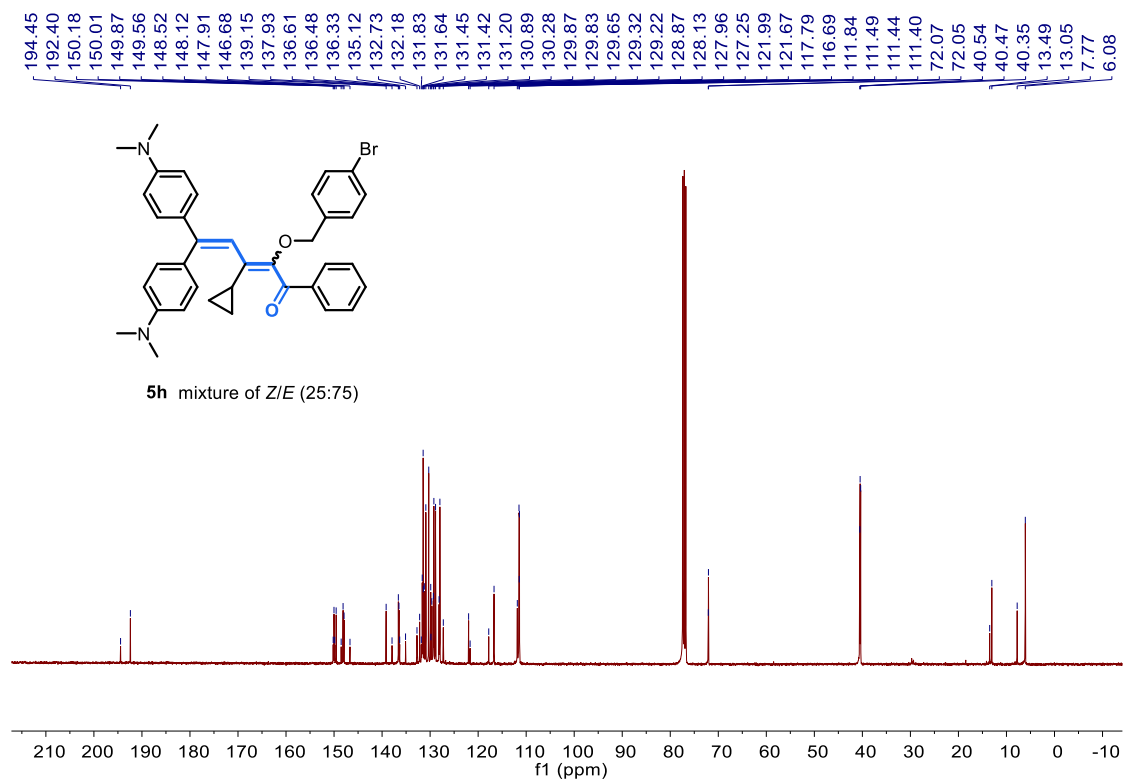

<sup>13</sup>C NMR Spectrum of Compound **5h** isomers mixture (100MHz, CDCl<sub>3</sub>)

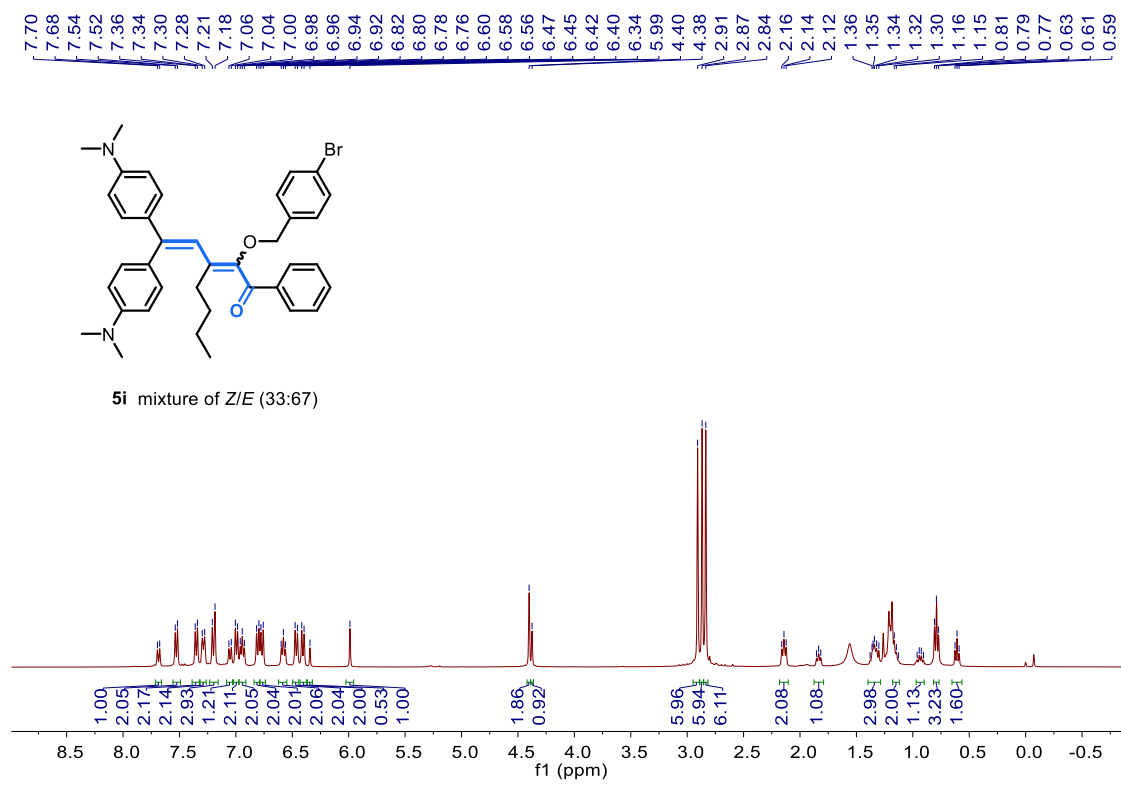

**1H NMR Spectrum of Compound **5i** isomers mixture (400MHz, CDCl<sub>3</sub>)**

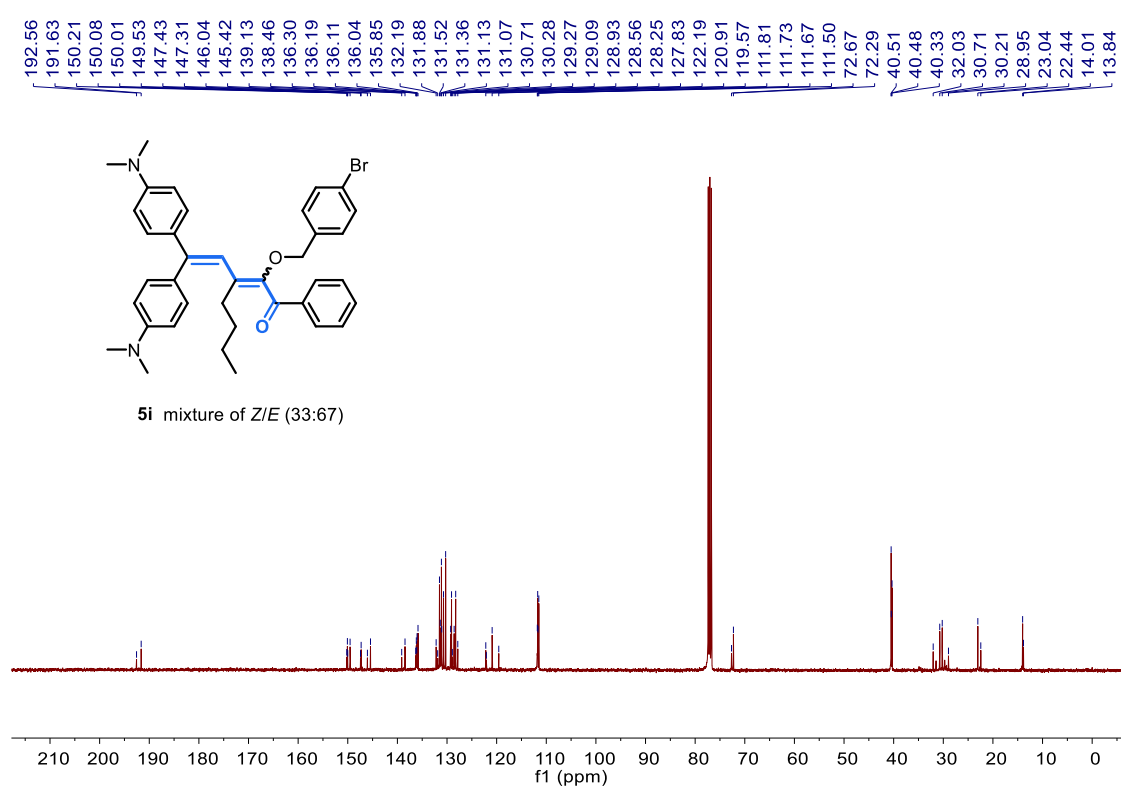

**13C NMR Spectrum of Compound **5i** isomers mixture (100MHz, CDCl<sub>3</sub>)**



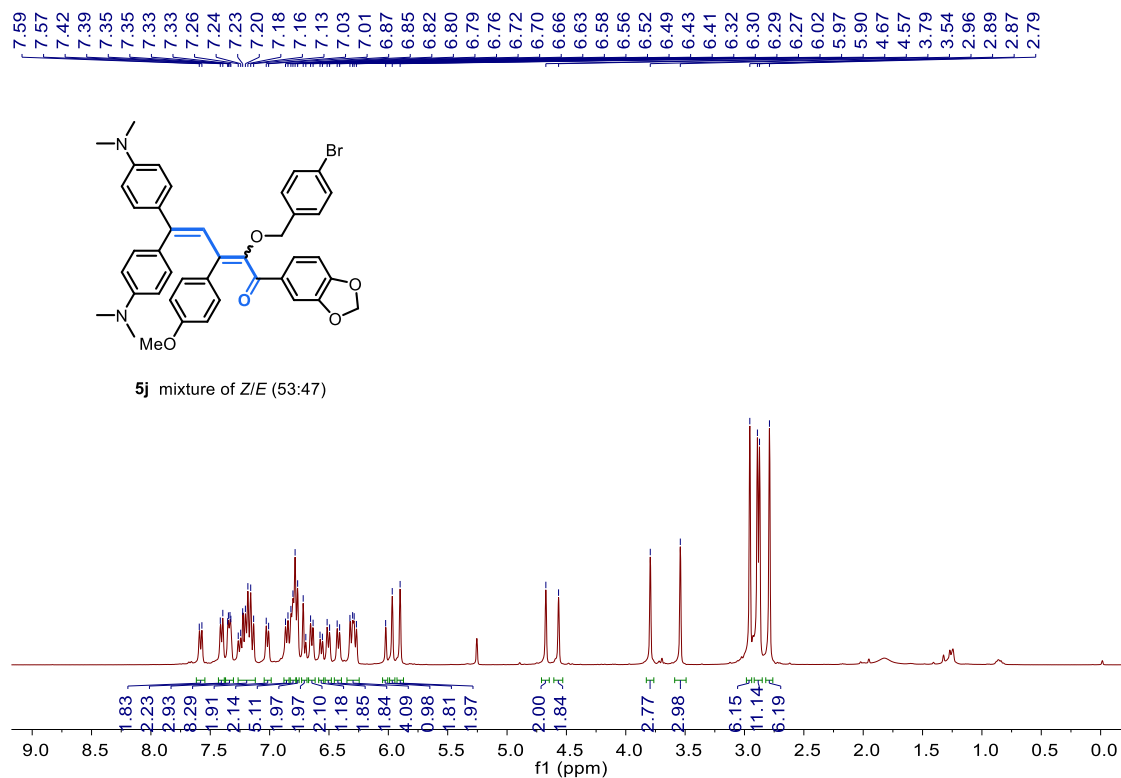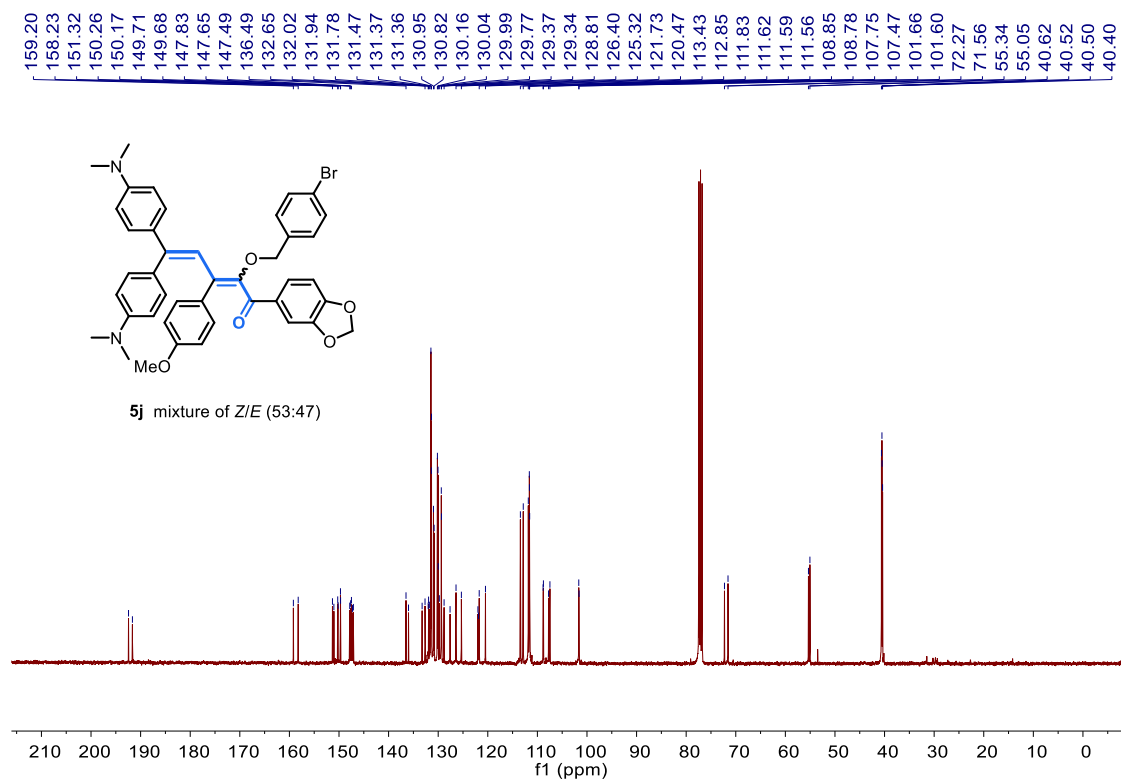

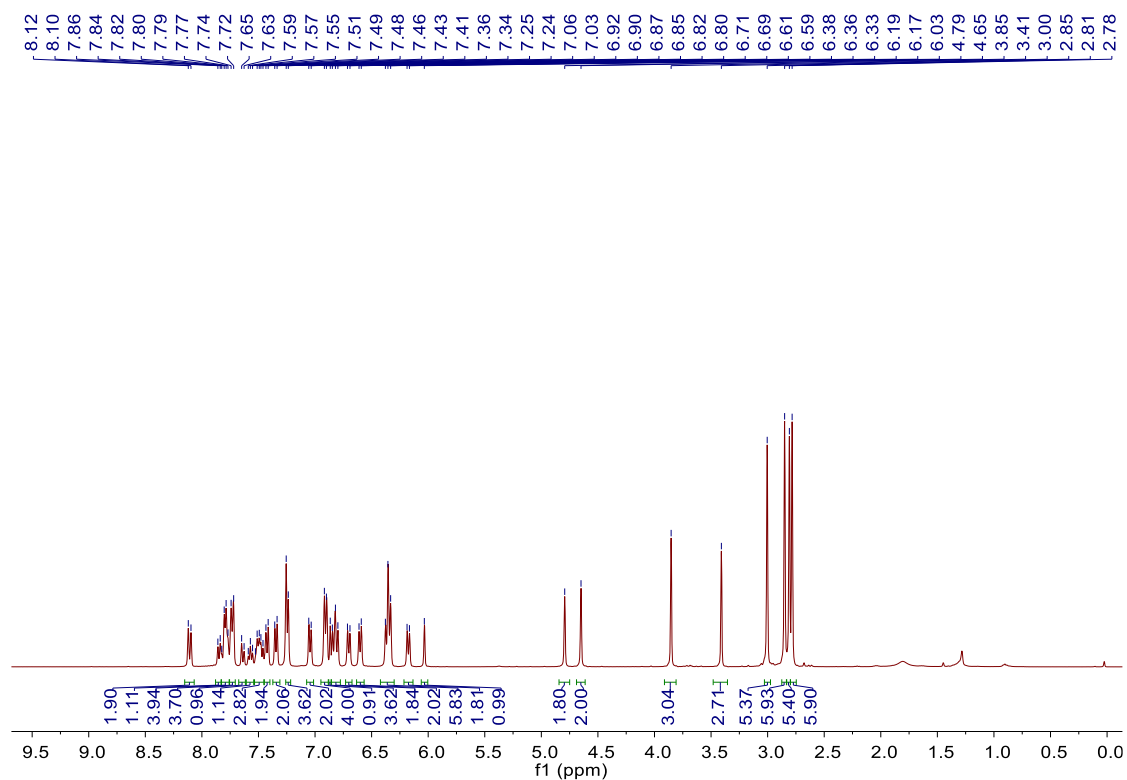

<sup>1</sup>H NMR Spectrum of Compound **5k** isomers mixture (400MHz, CDCl<sub>3</sub>)

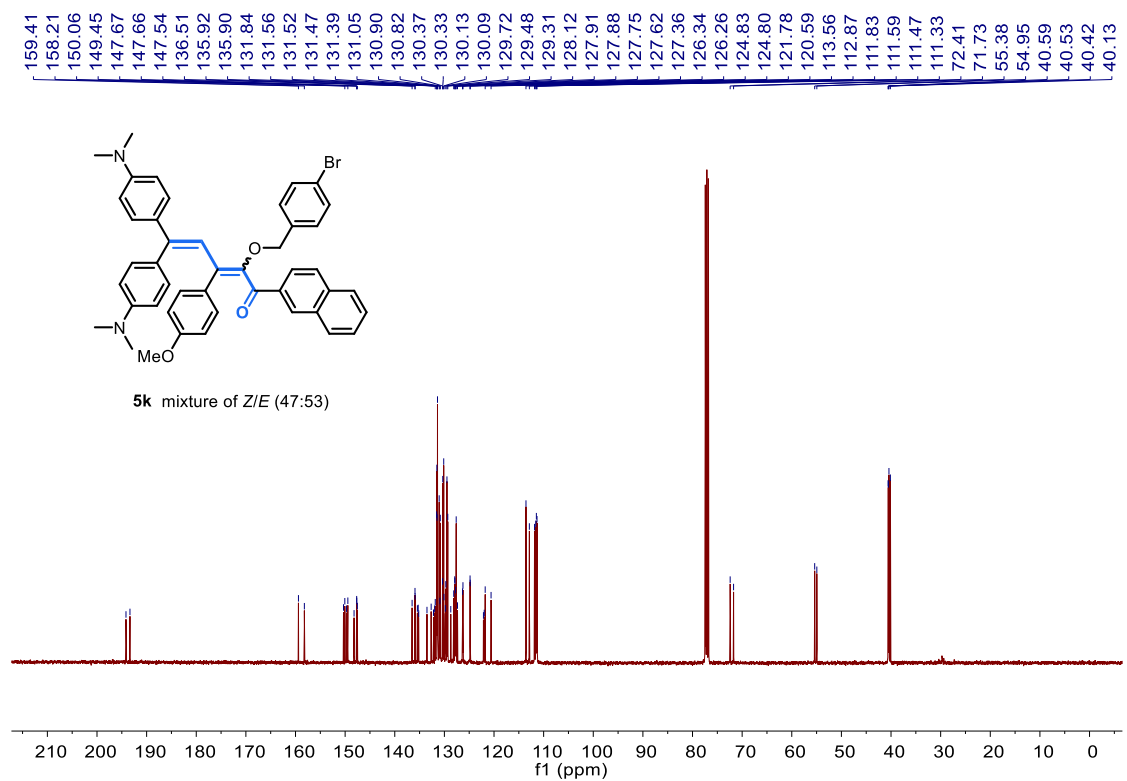

<sup>13</sup>C NMR Spectrum of Compound **5k** isomers mixture (100MHz, CDCl<sub>3</sub>)

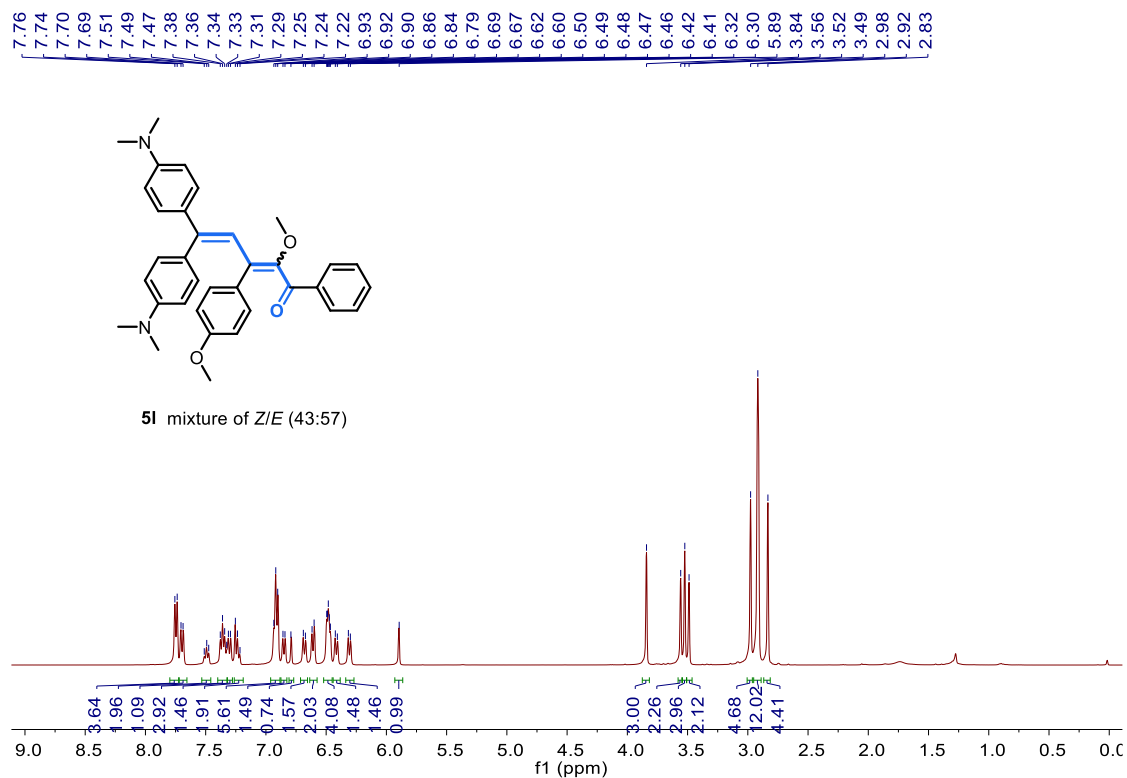

5I mixture of Z/E (43:57)

<sup>1</sup>H NMR Spectrum of Compound 5I isomers mixture (400MHz, CDCl<sub>3</sub>)

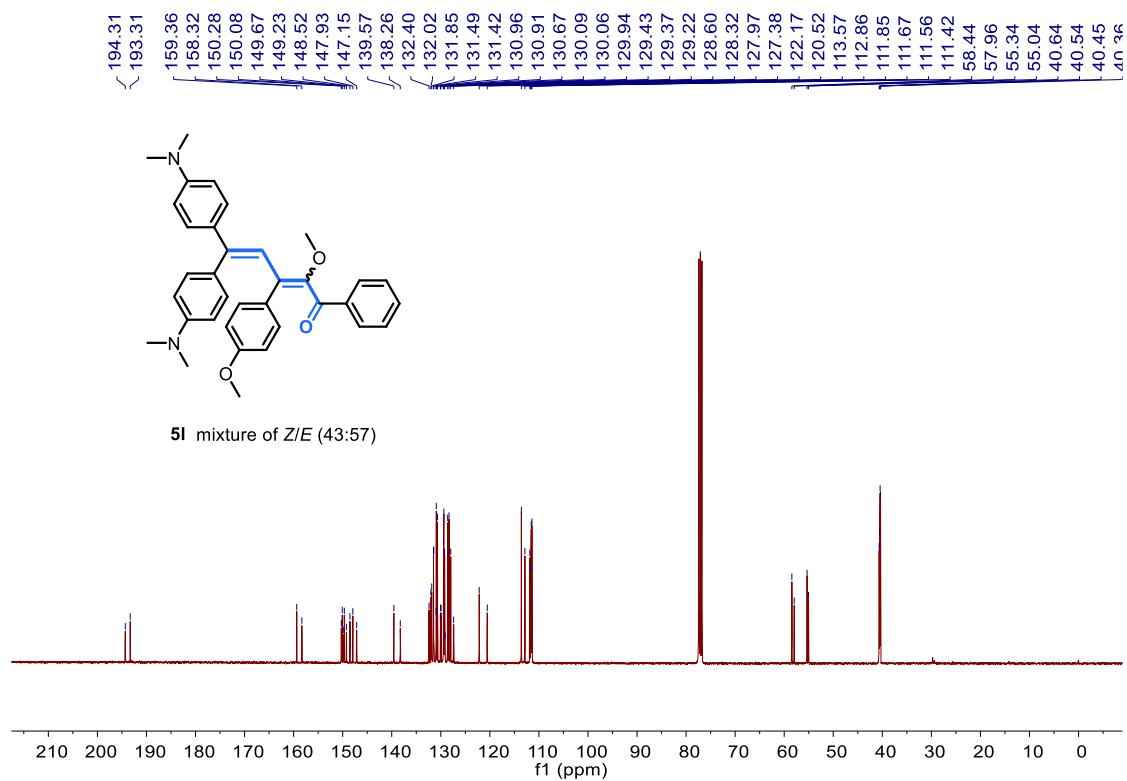

5I mixture of Z/E (43:57)

<sup>13</sup>C NMR Spectrum of Compound 5I isomers mixture (100MHz, CDCl<sub>3</sub>)

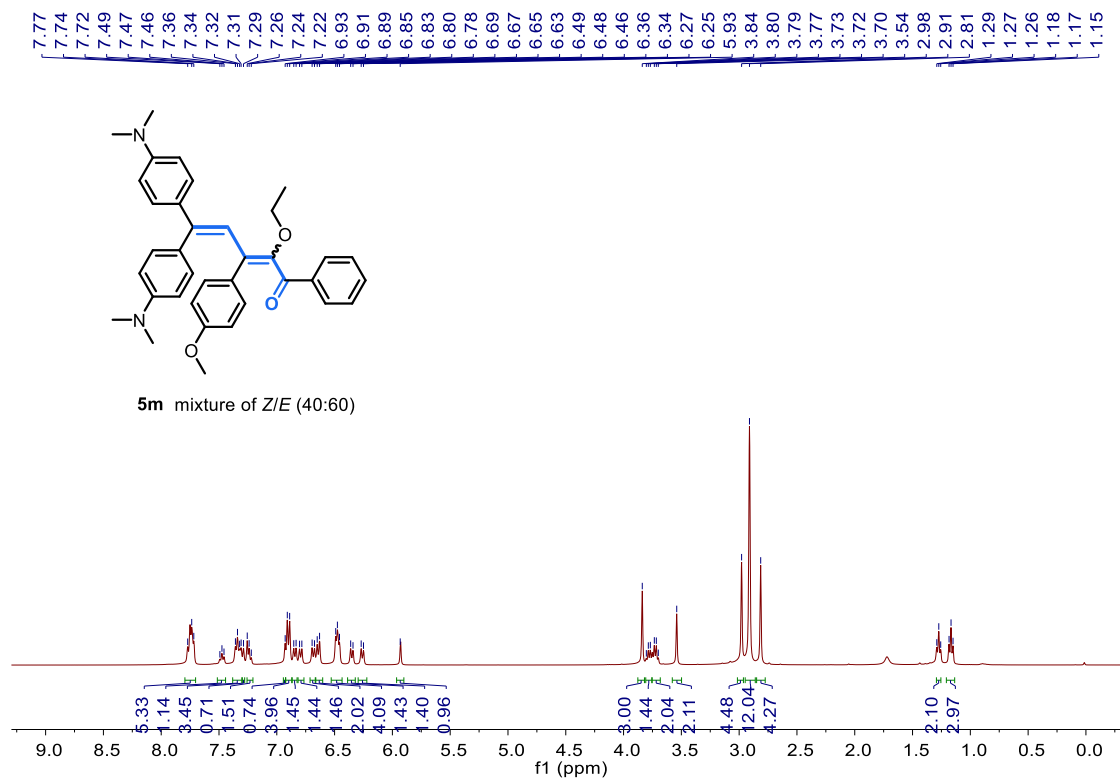

<sup>1</sup>H NMR Spectrum of Compound **5m** isomers mixture (400MHz, CDCl<sub>3</sub>)

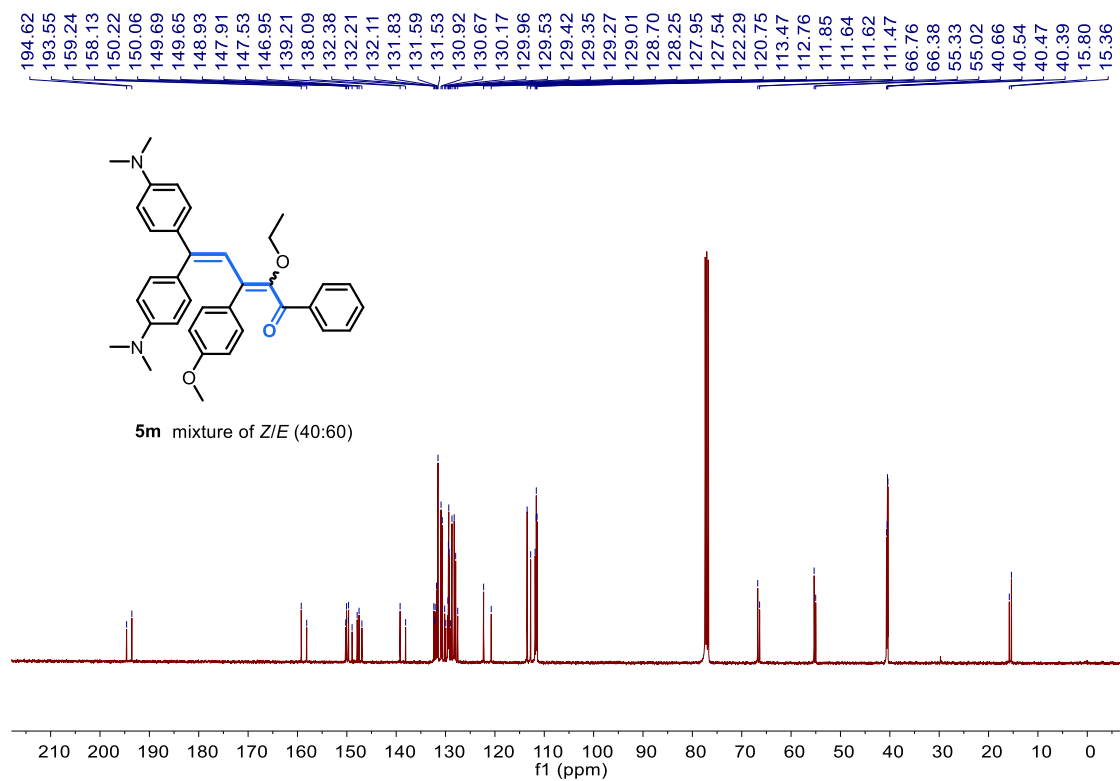

<sup>13</sup>C NMR Spectrum of Compound **5m** isomers mixture (100MHz, CDCl<sub>3</sub>)

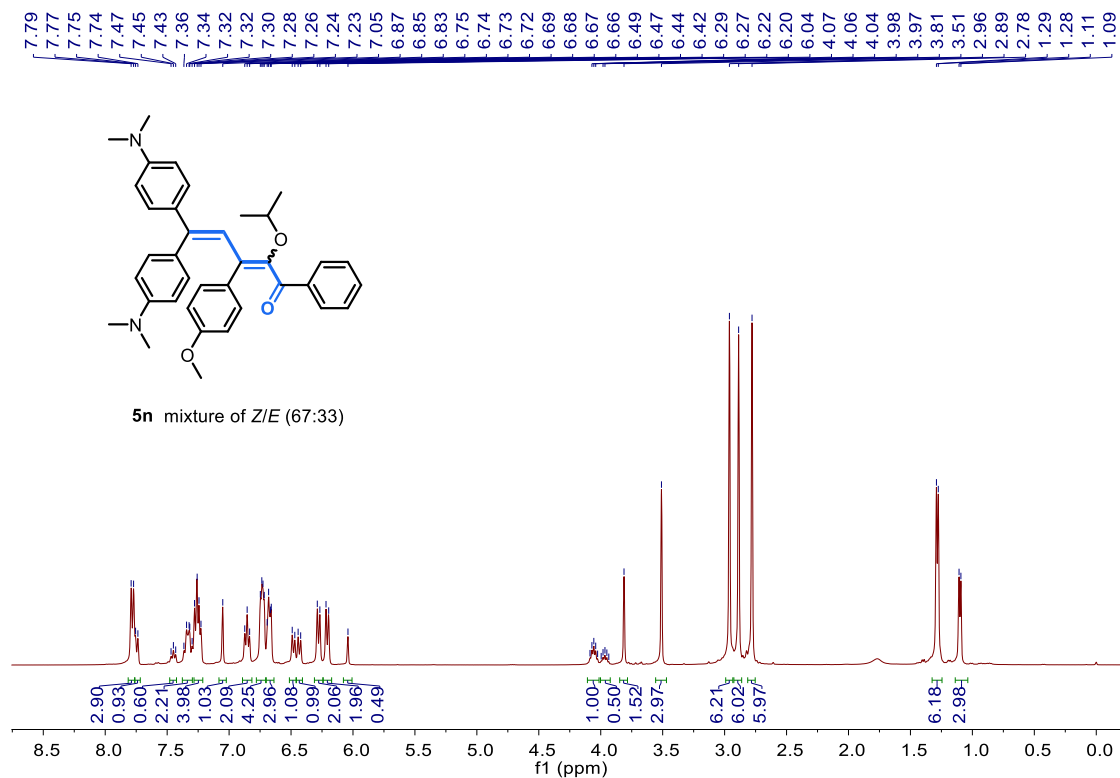

**1H NMR Spectrum of Compound **5n** isomers mixture (400MHz, CDCl<sub>3</sub>)**

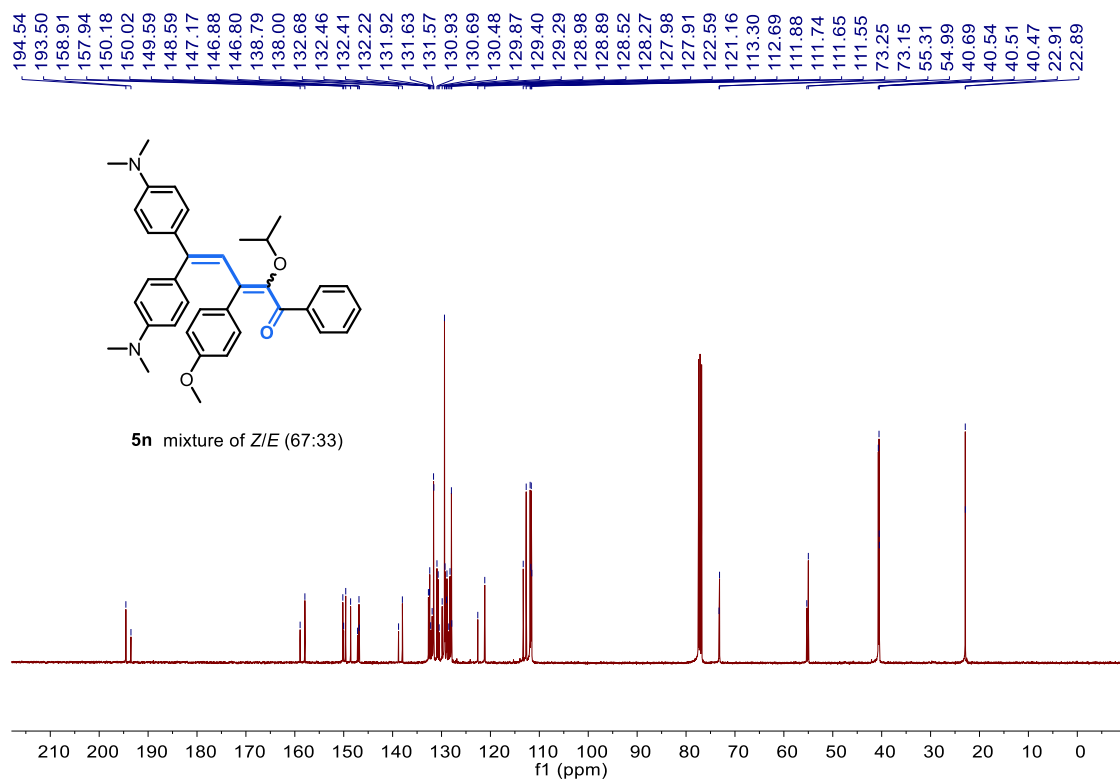

**13C NMR Spectrum of Compound **5n** isomers mixture (100MHz, CDCl<sub>3</sub>)**

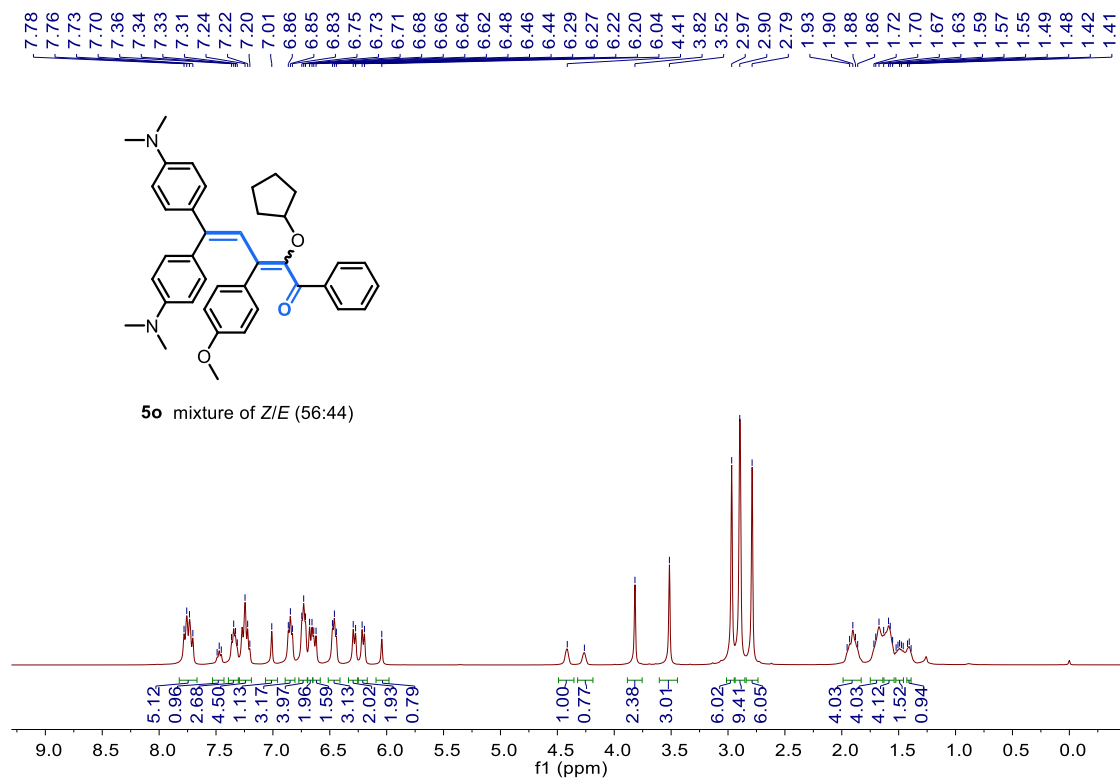

<sup>1</sup>H NMR Spectrum of Compound **5o** isomers mixture (400MHz, CDCl<sub>3</sub>)

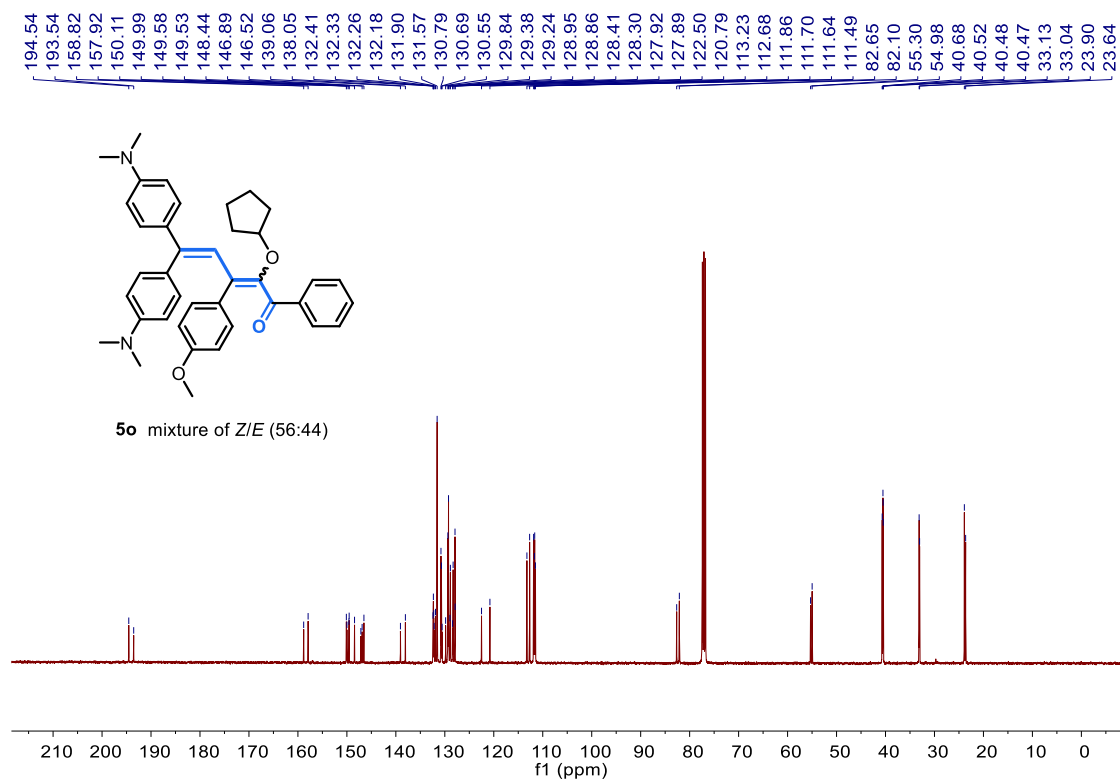

<sup>13</sup>C NMR Spectrum of Compound **5o** isomers mixture (100MHz, CDCl<sub>3</sub>)

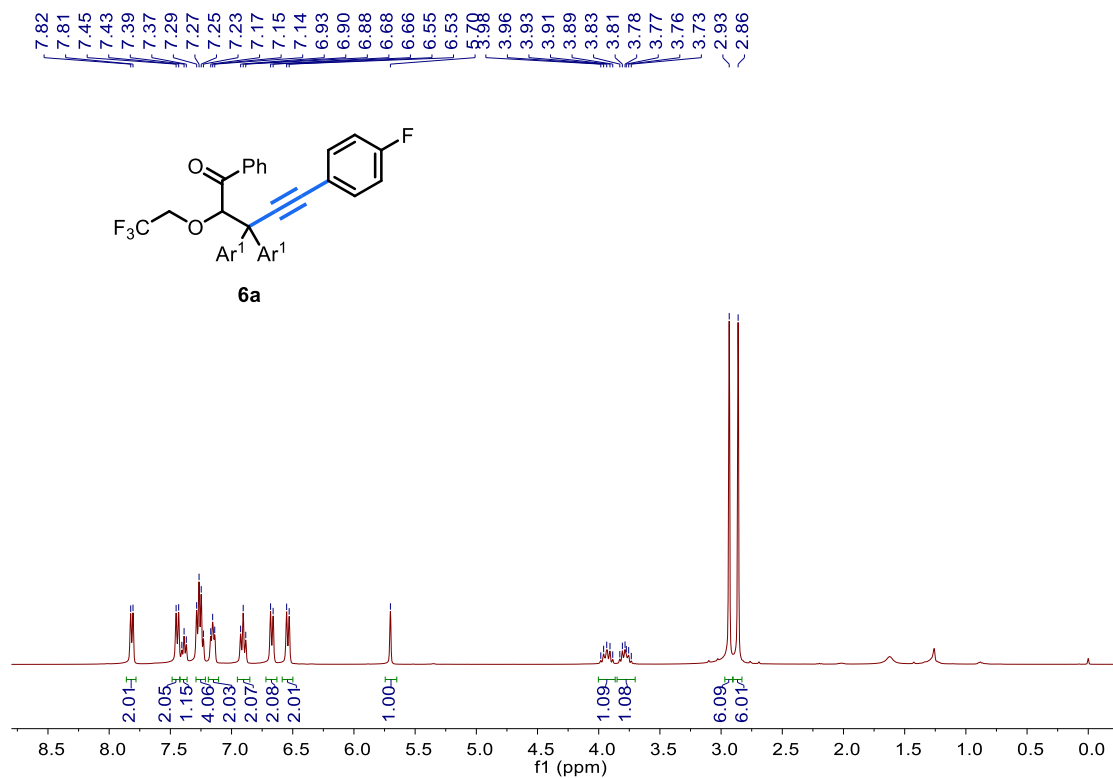

**<sup>1</sup>H NMR Spectrum of Compound 6a (400MHz, CDCl<sub>3</sub>)**

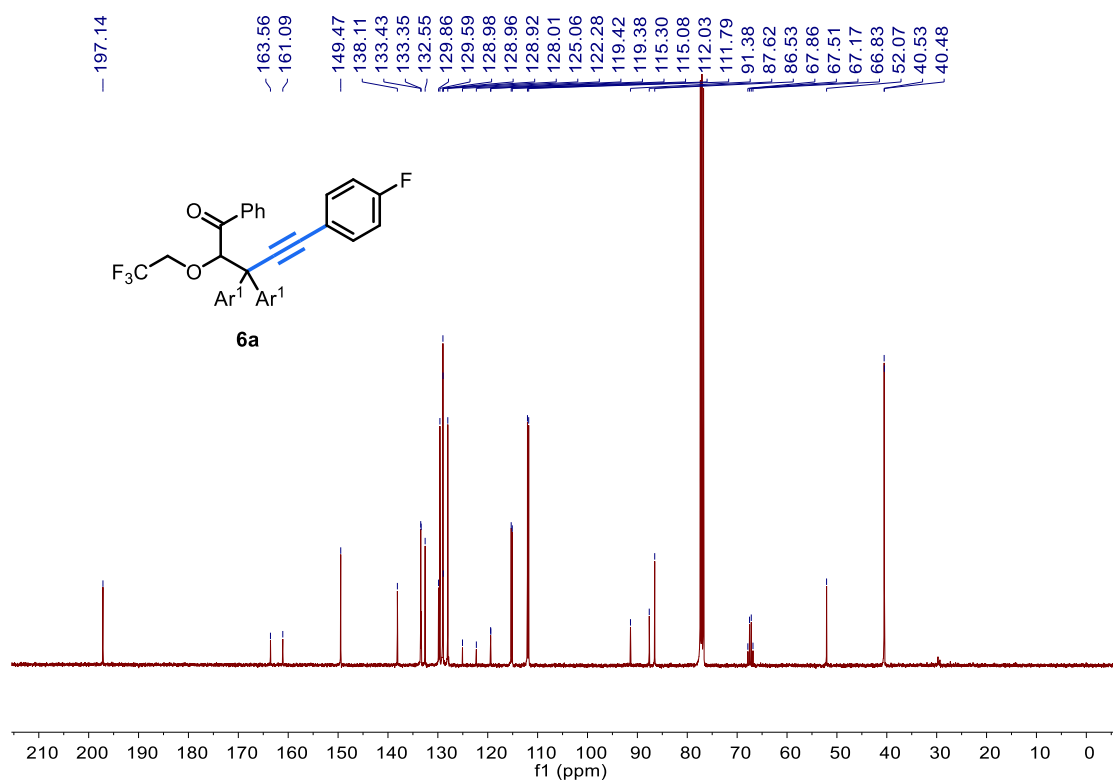

**<sup>13</sup>C NMR Spectrum of Compound 6a (100MHz, CDCl<sub>3</sub>)**

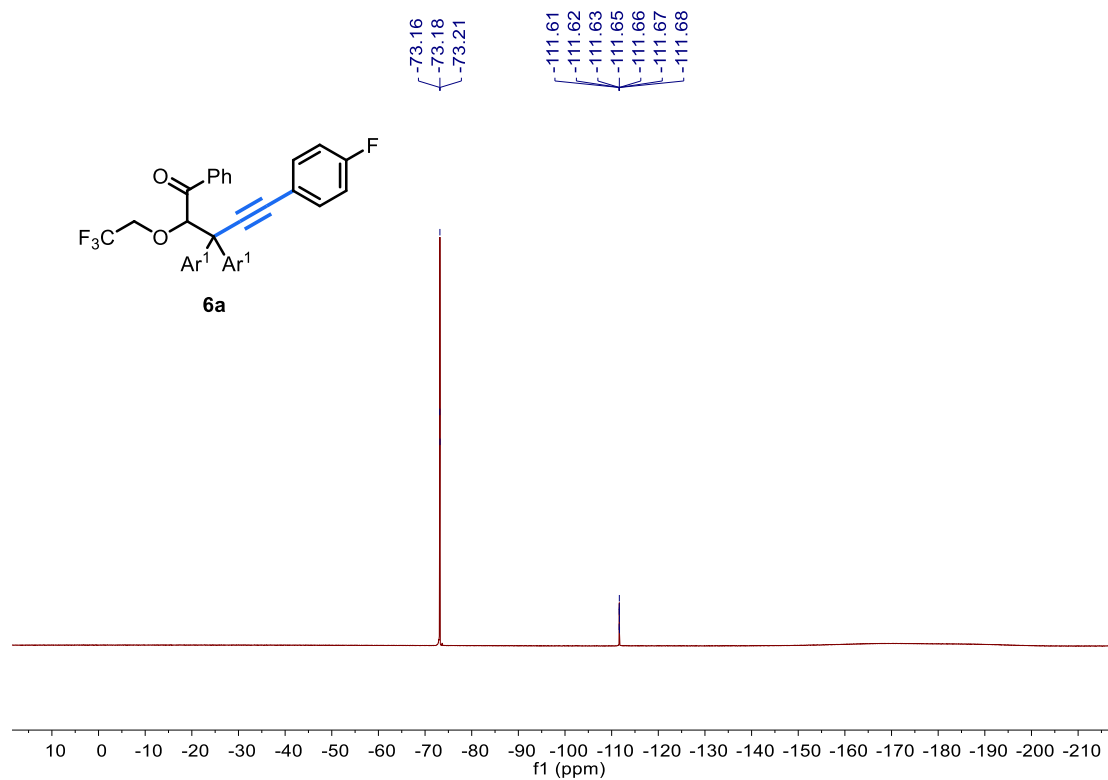

$^{19}\text{F}$  NMR Spectrum of Compound **6a** (376 MHz,  $\text{CDCl}_3$ )

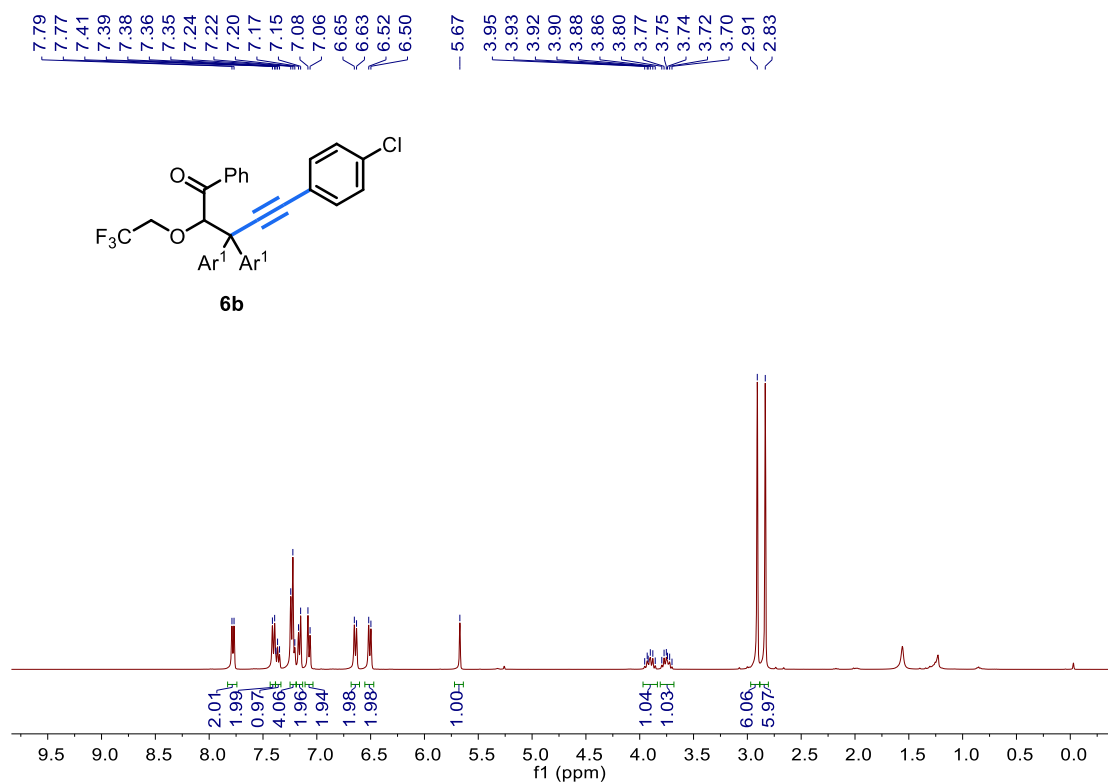

$^1\text{H}$  NMR Spectrum of Compound **6b** (400 MHz,  $\text{CDCl}_3$ )



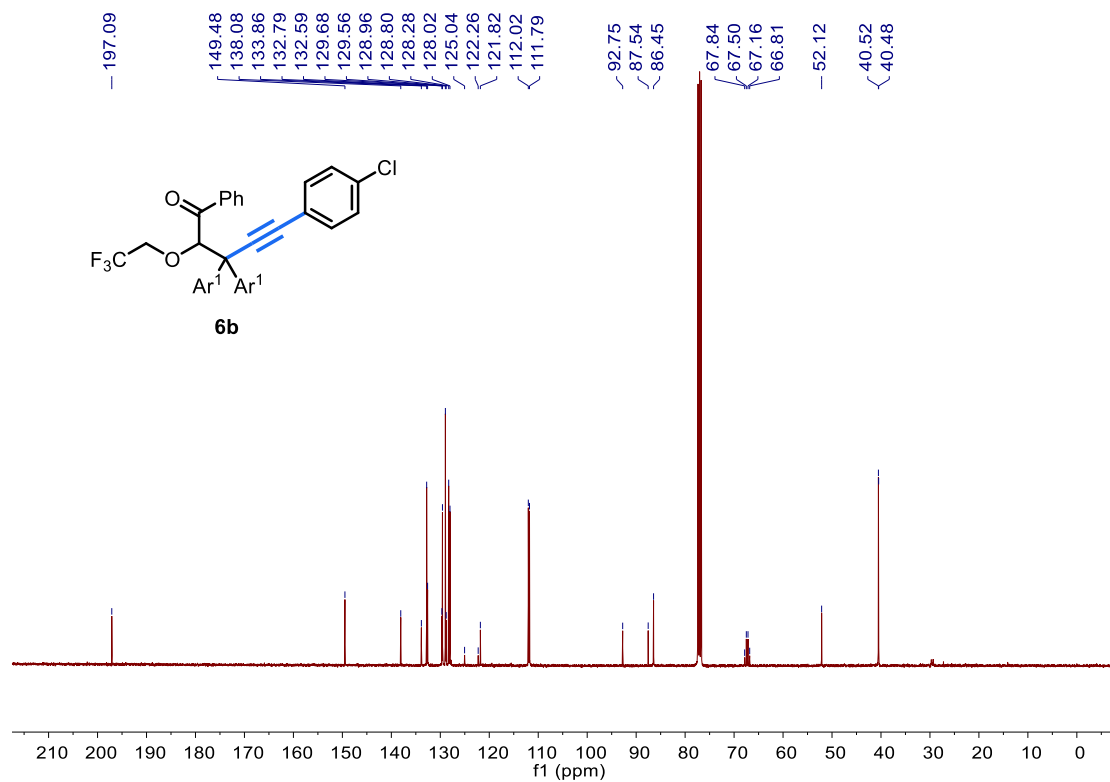

**13C NMR Spectrum of Compound **6b** (100MHz, CDCl<sub>3</sub>)**

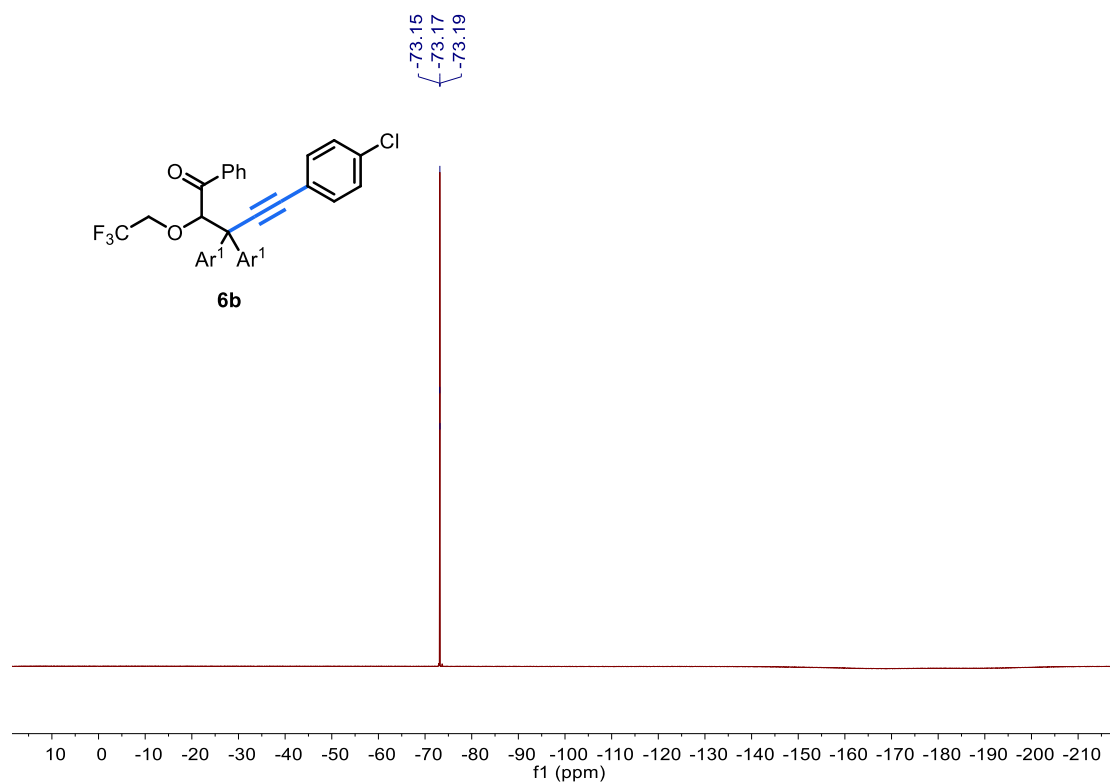

**19F NMR Spectrum of Compound **6b** (376 MHz, CDCl<sub>3</sub>)**

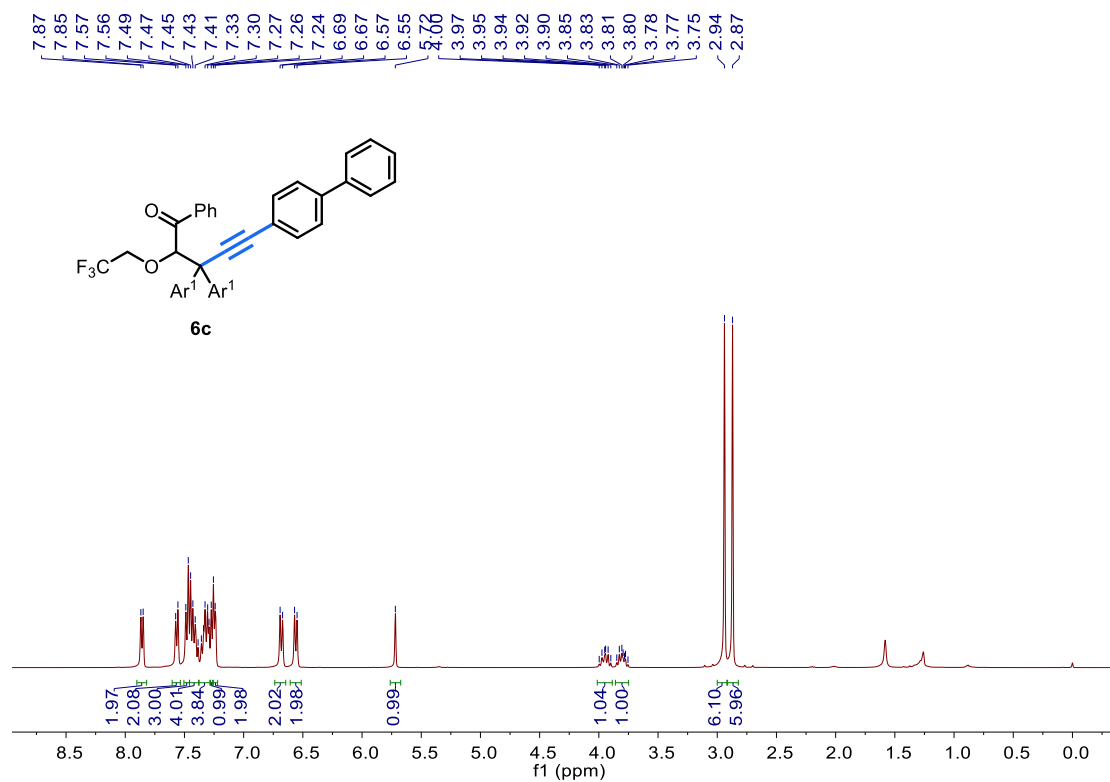

<sup>1</sup>H NMR Spectrum of Compound **6c** (400MHz, CDCl<sub>3</sub>)

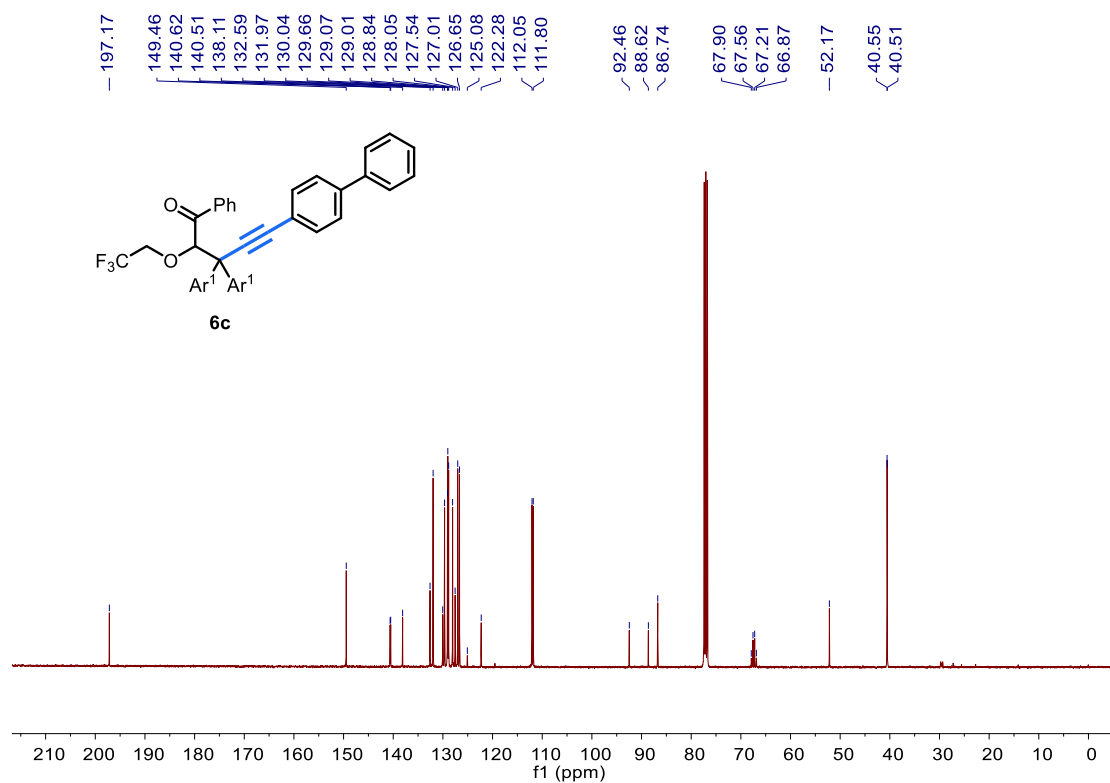

<sup>13</sup>C NMR Spectrum of Compound **6c** (100MHz, CDCl<sub>3</sub>)

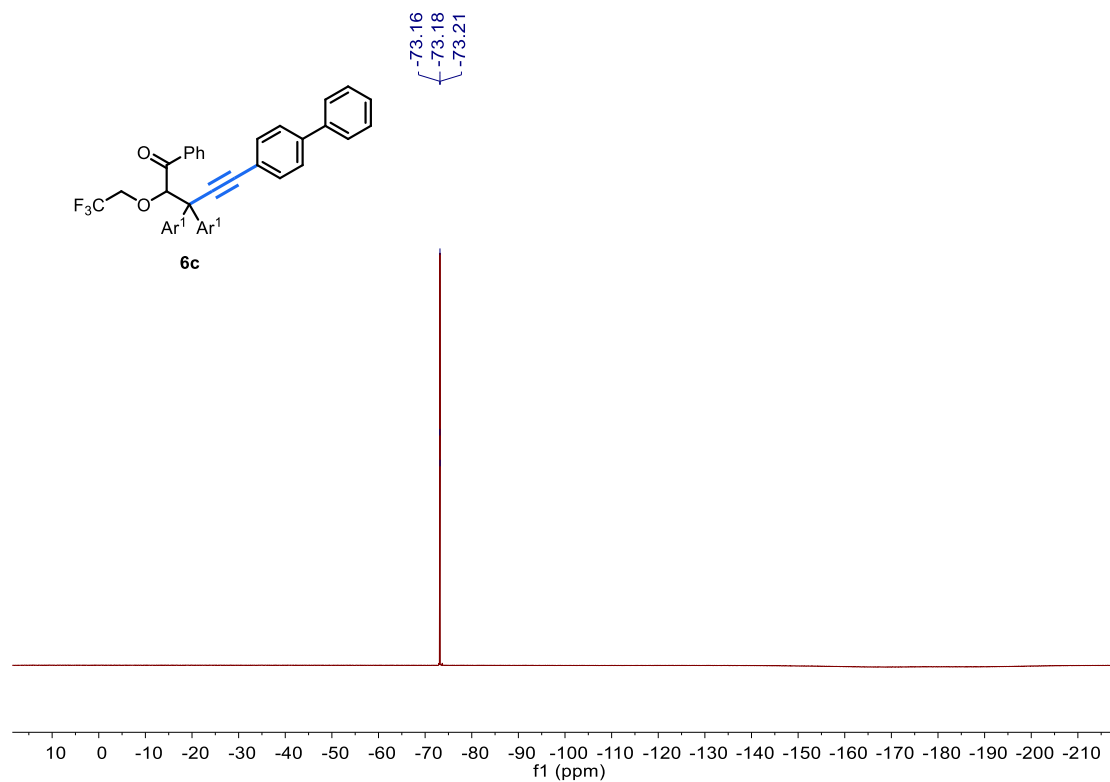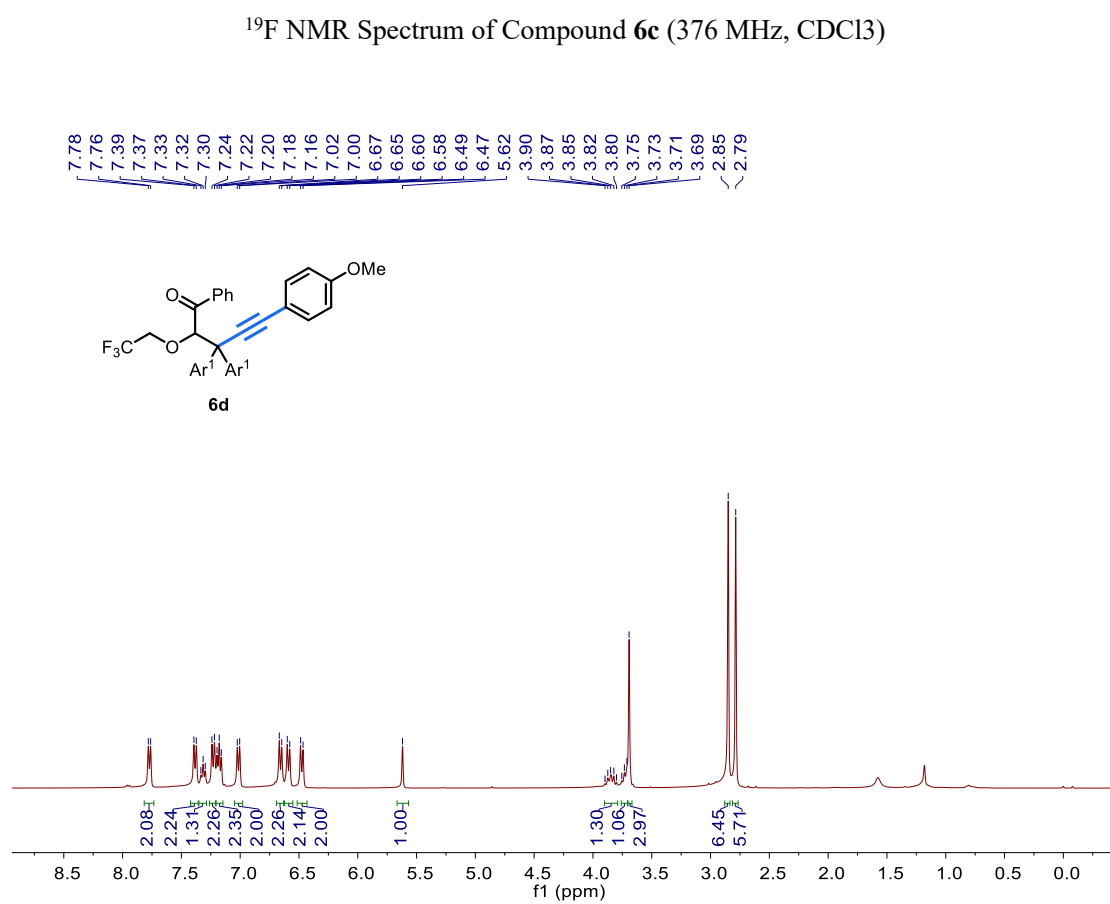

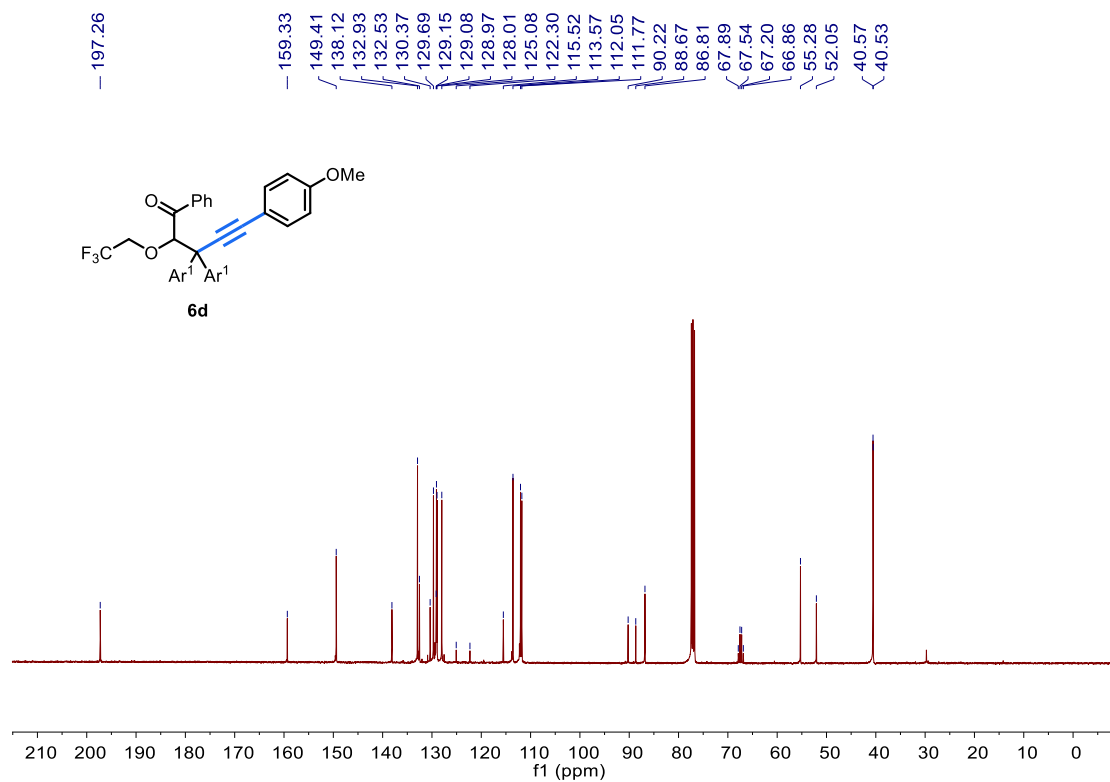

$^{13}\text{C}$  NMR Spectrum of Compound **6d** (100MHz,  $\text{CDCl}_3$ )

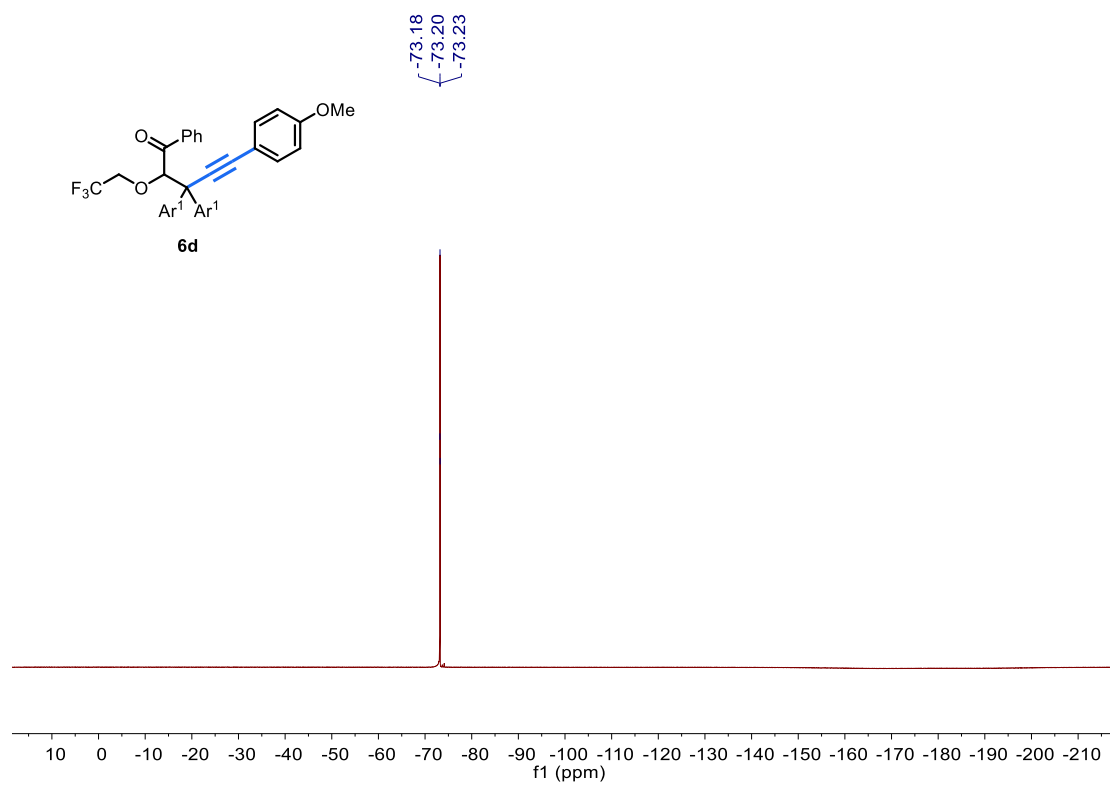

$^{19}\text{F}$  NMR Spectrum of Compound **6d** (376 MHz,  $\text{CDCl}_3$ )

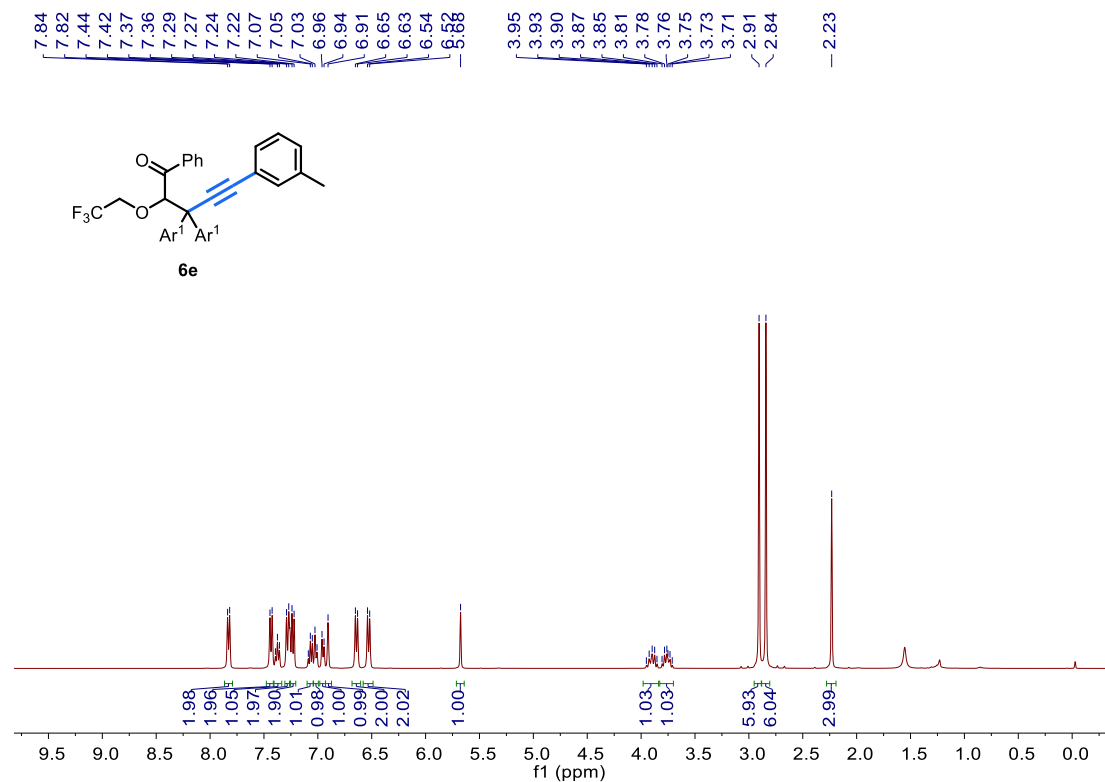

**<sup>1</sup>H NMR Spectrum of Compound 6e (400MHz, CDCl<sub>3</sub>)**

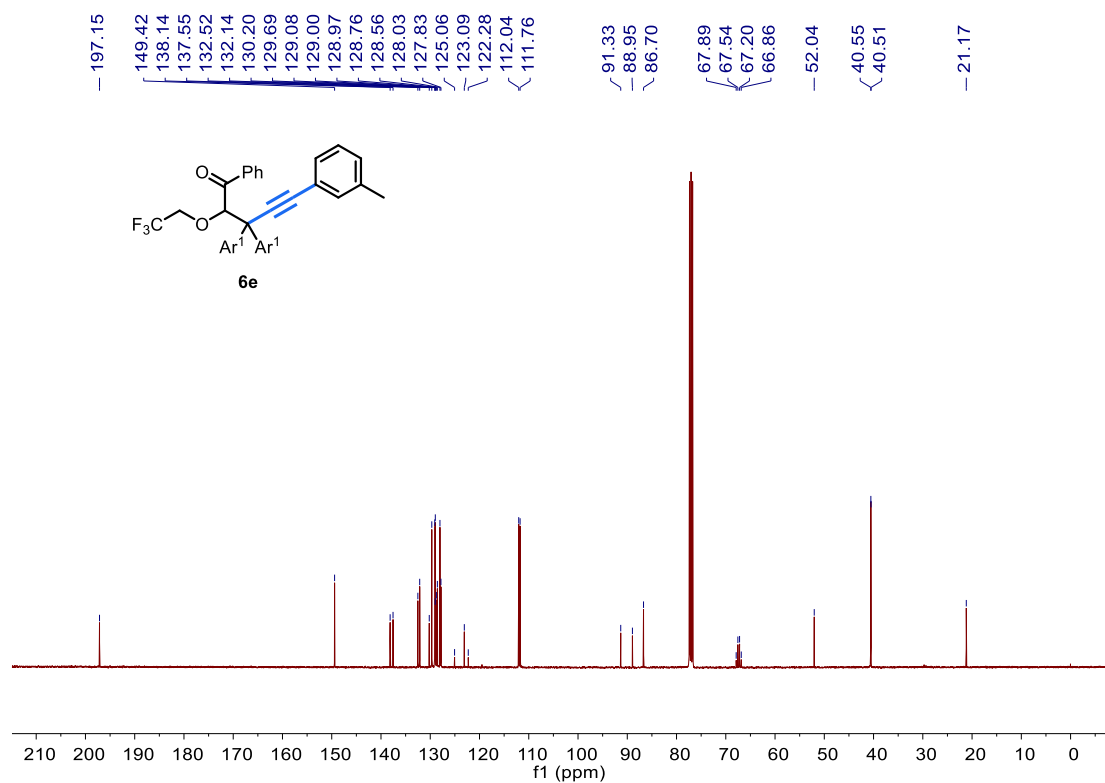

**<sup>13</sup>C NMR Spectrum of Compound 6e (100MHz, CDCl<sub>3</sub>)**

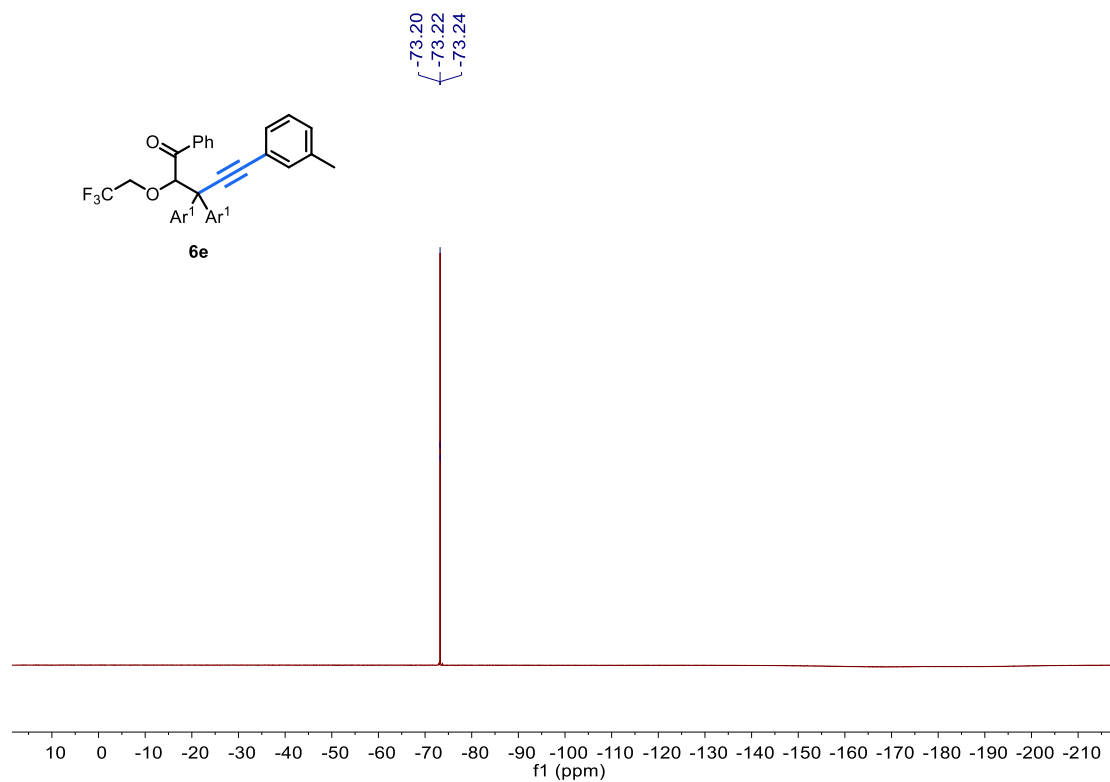

<sup>19</sup>F NMR Spectrum of Compound **6e** (376 MHz, CDCl<sub>3</sub>)

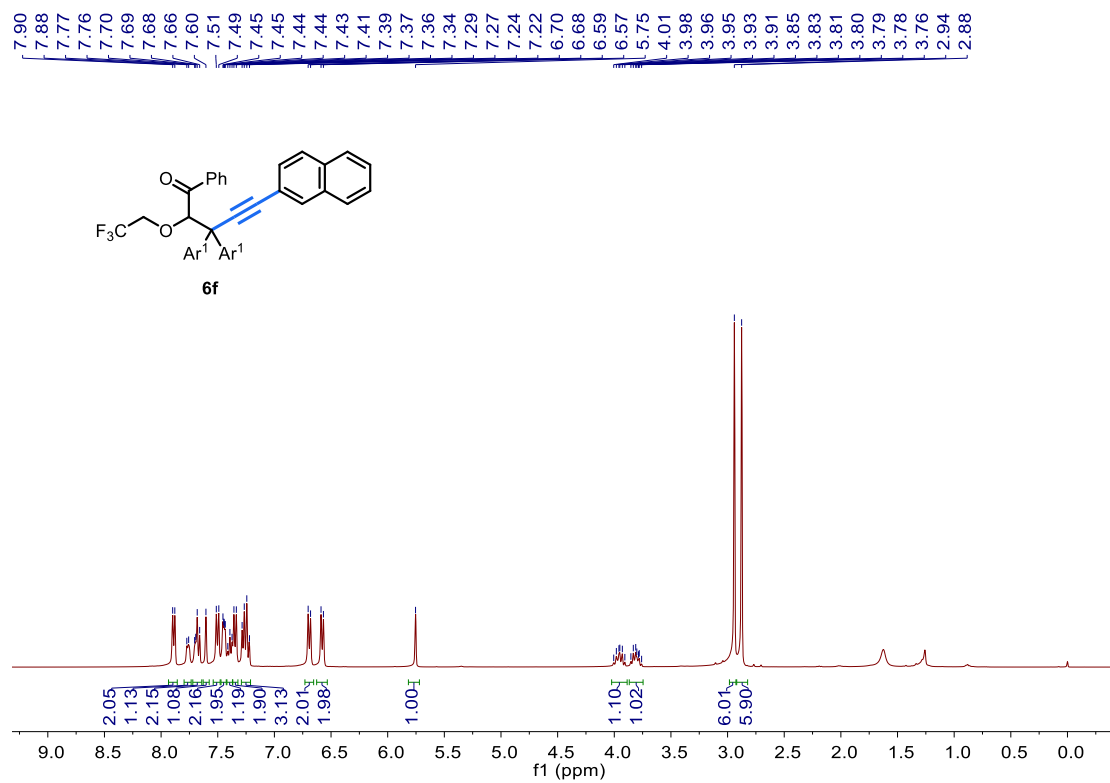

<sup>1</sup>H NMR Spectrum of Compound **6f** (400 MHz, CDCl<sub>3</sub>)

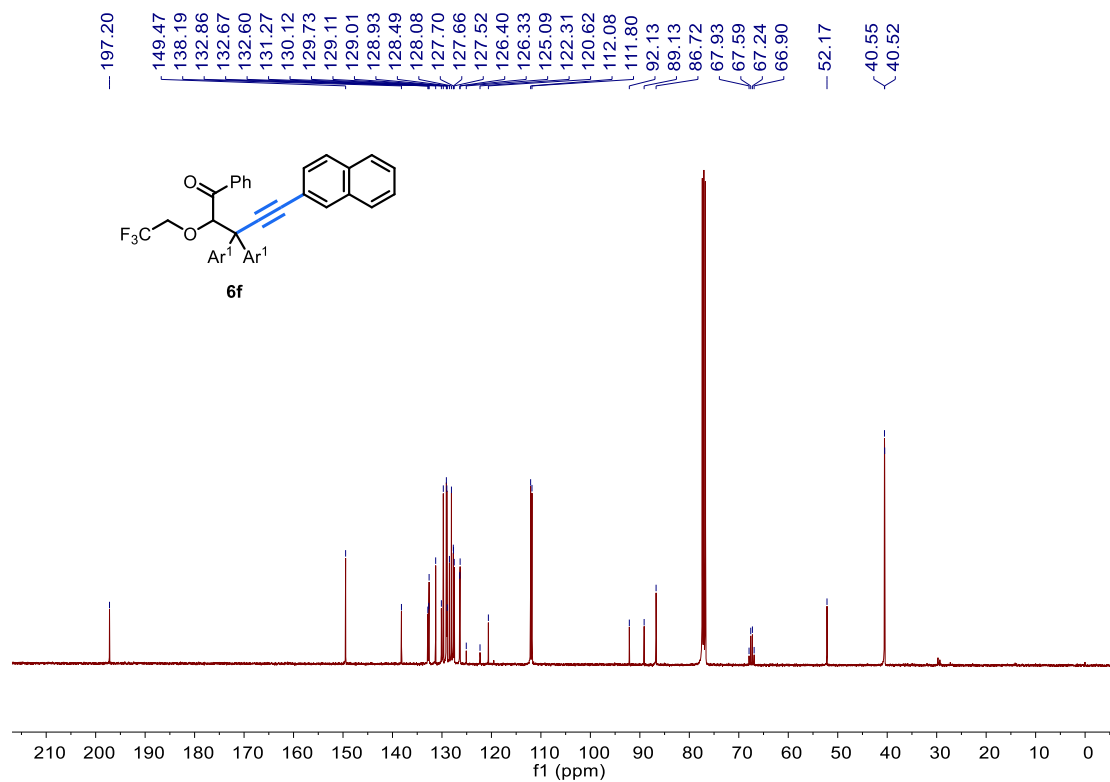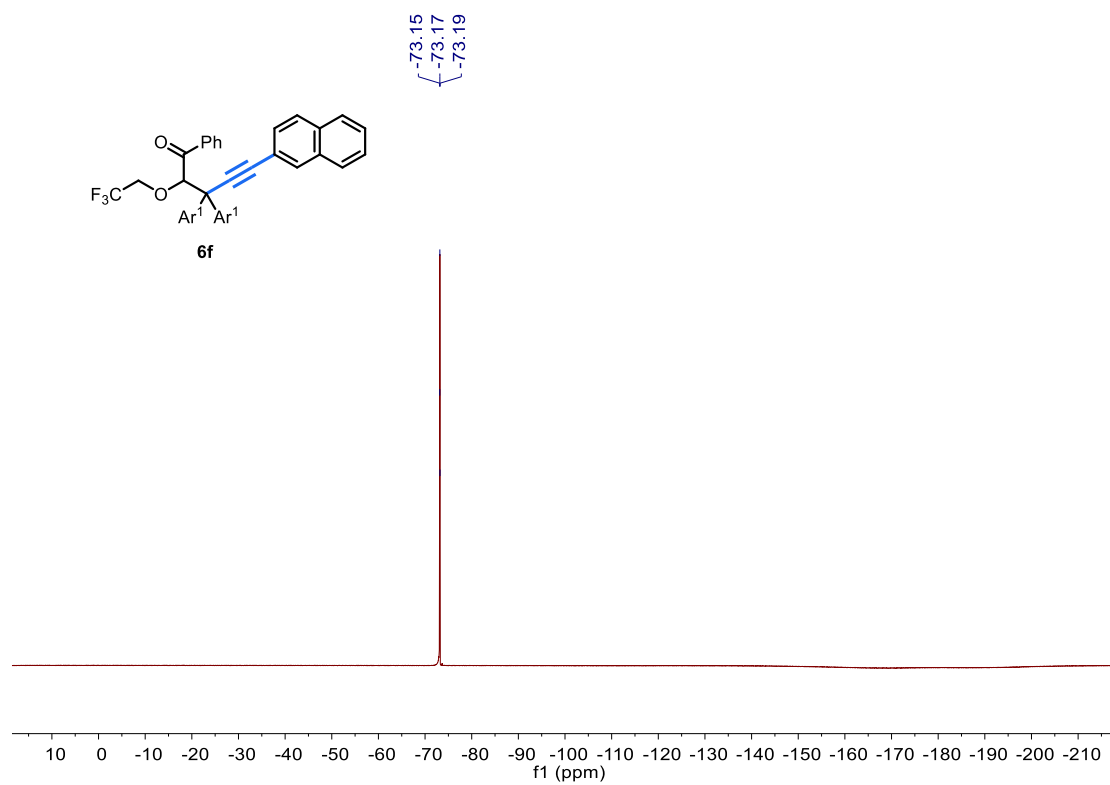

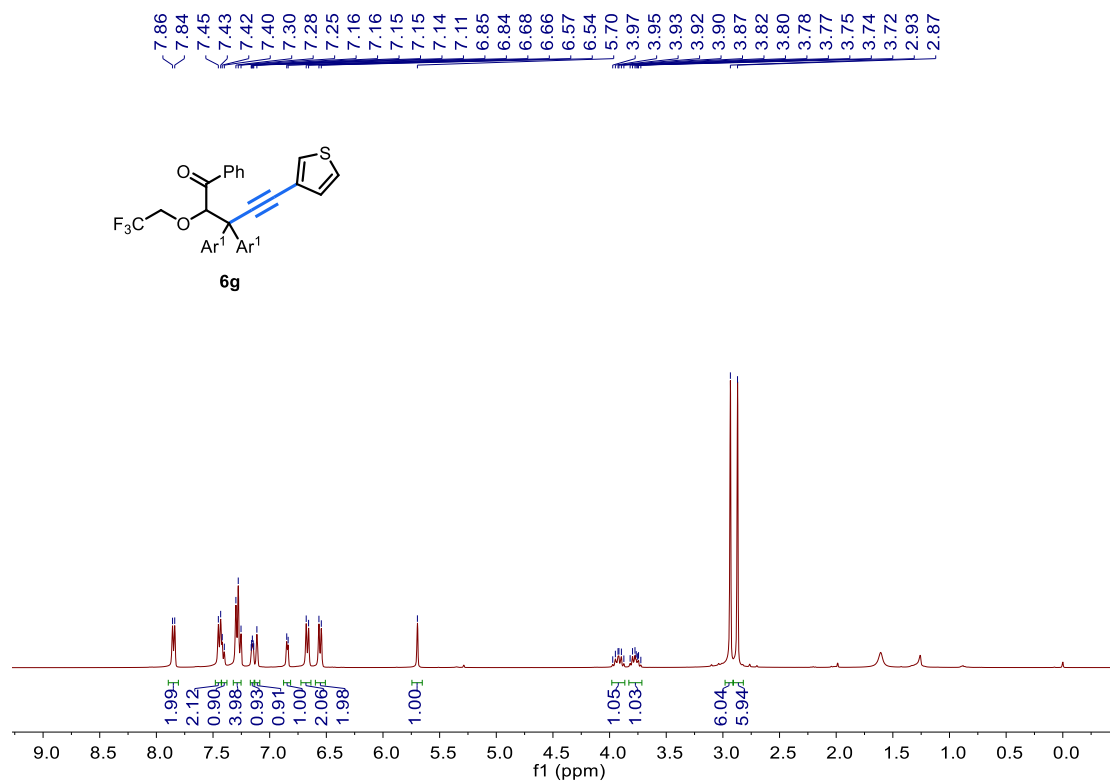

**1H NMR Spectrum of Compound 6g (400MHz, CDCl<sub>3</sub>)**

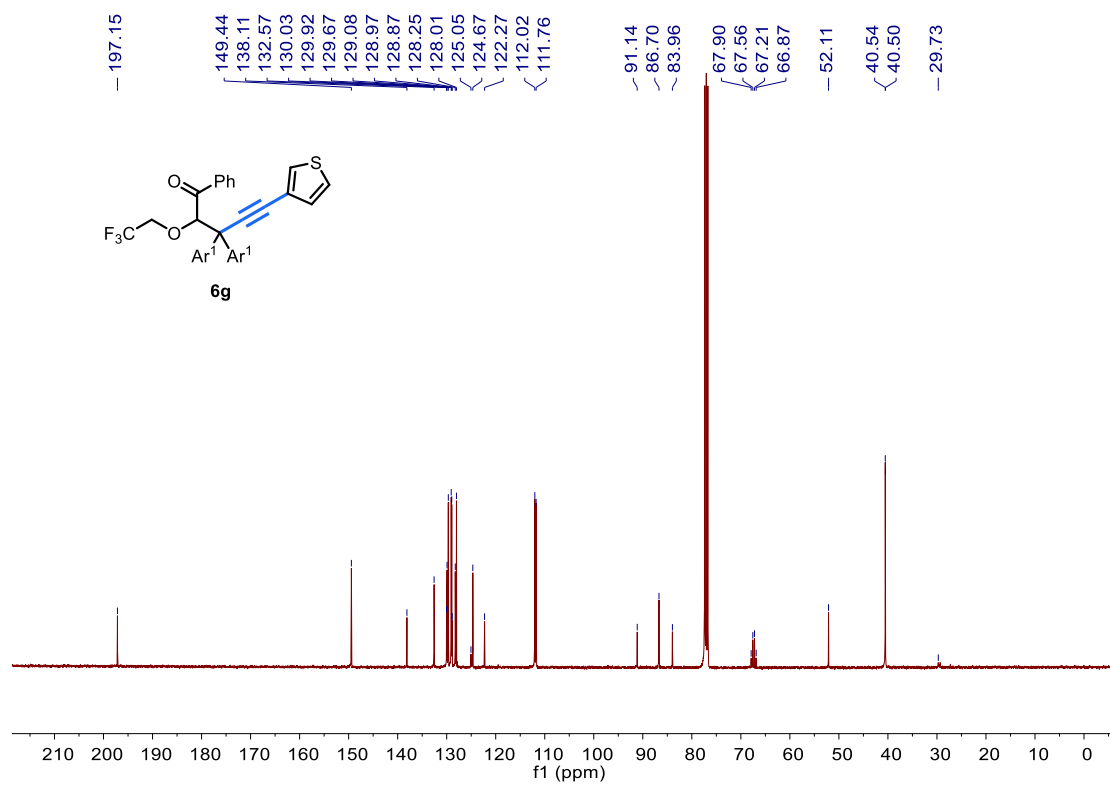

**13C NMR Spectrum of Compound 6g (100MHz, CDCl<sub>3</sub>)**



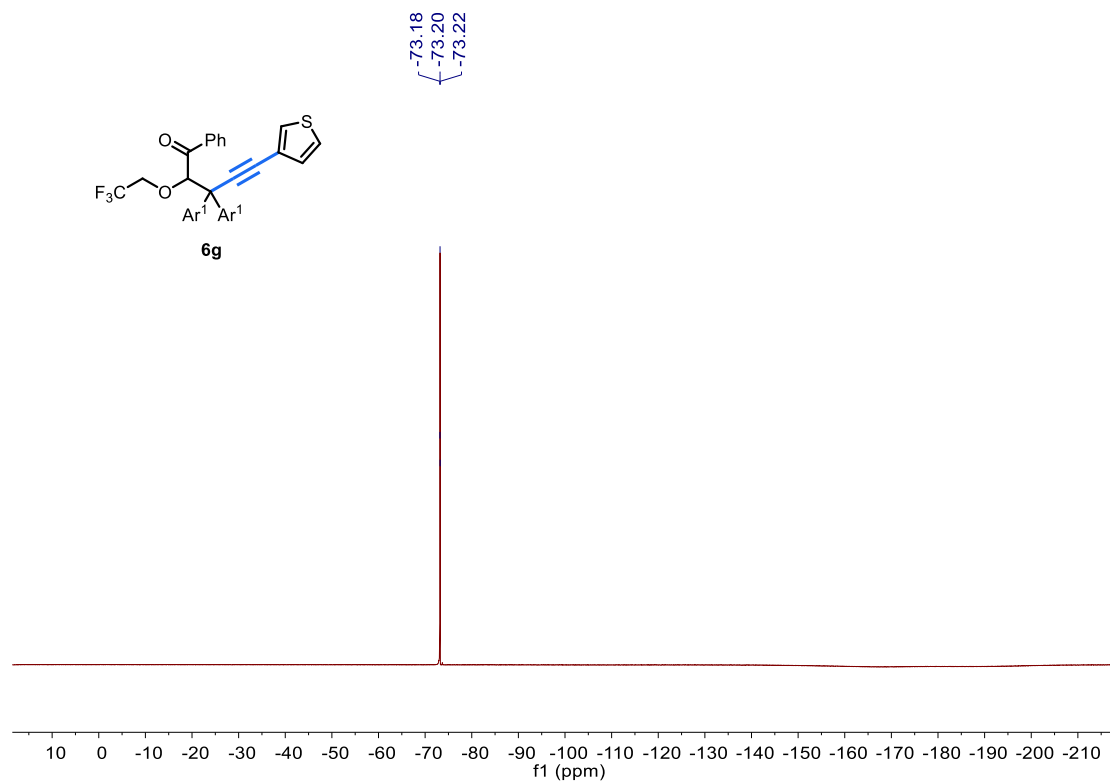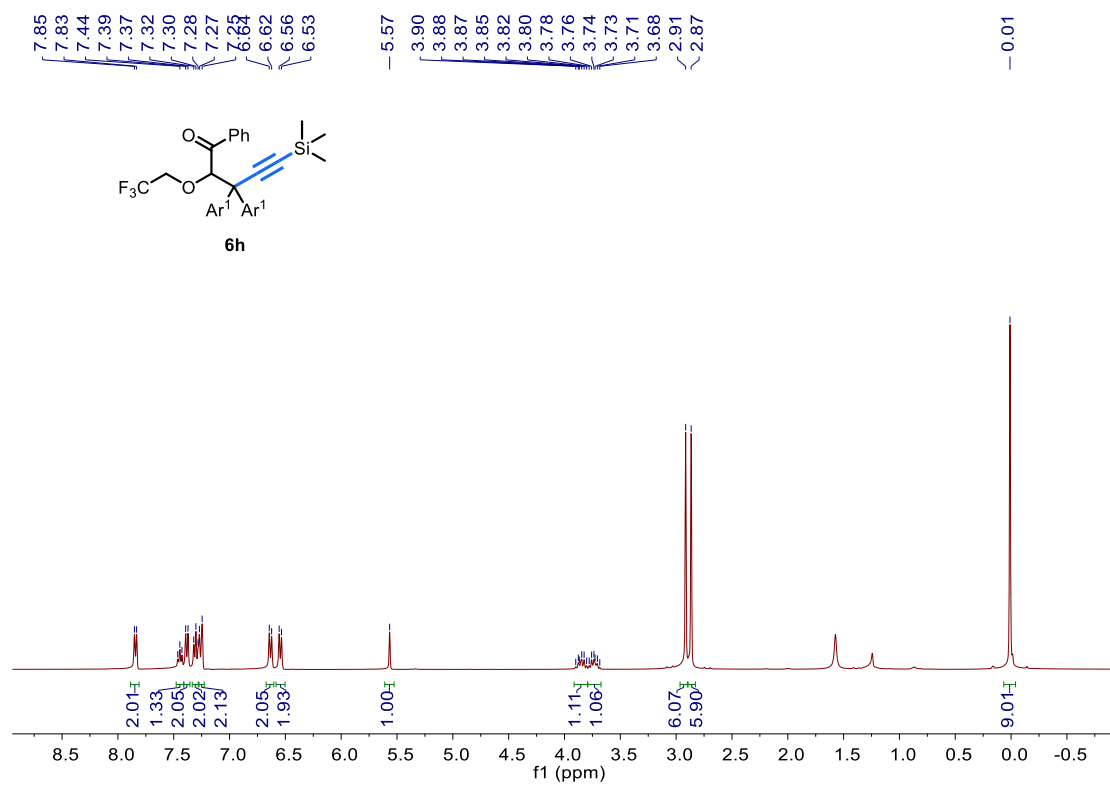

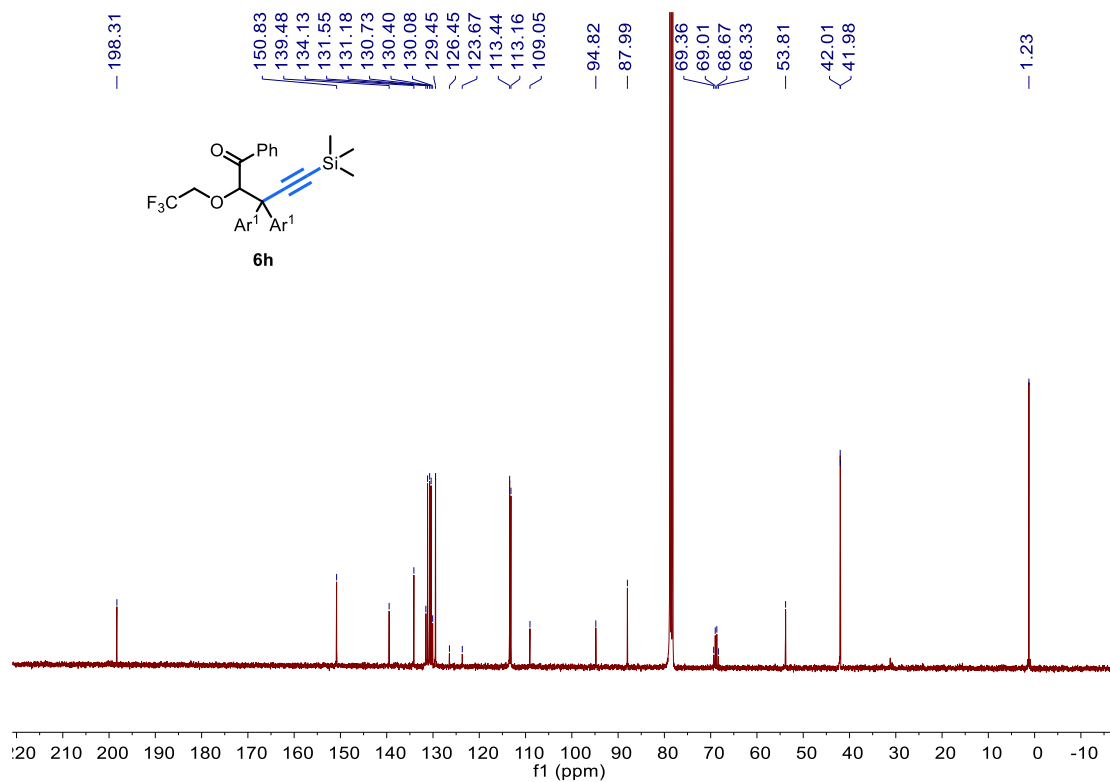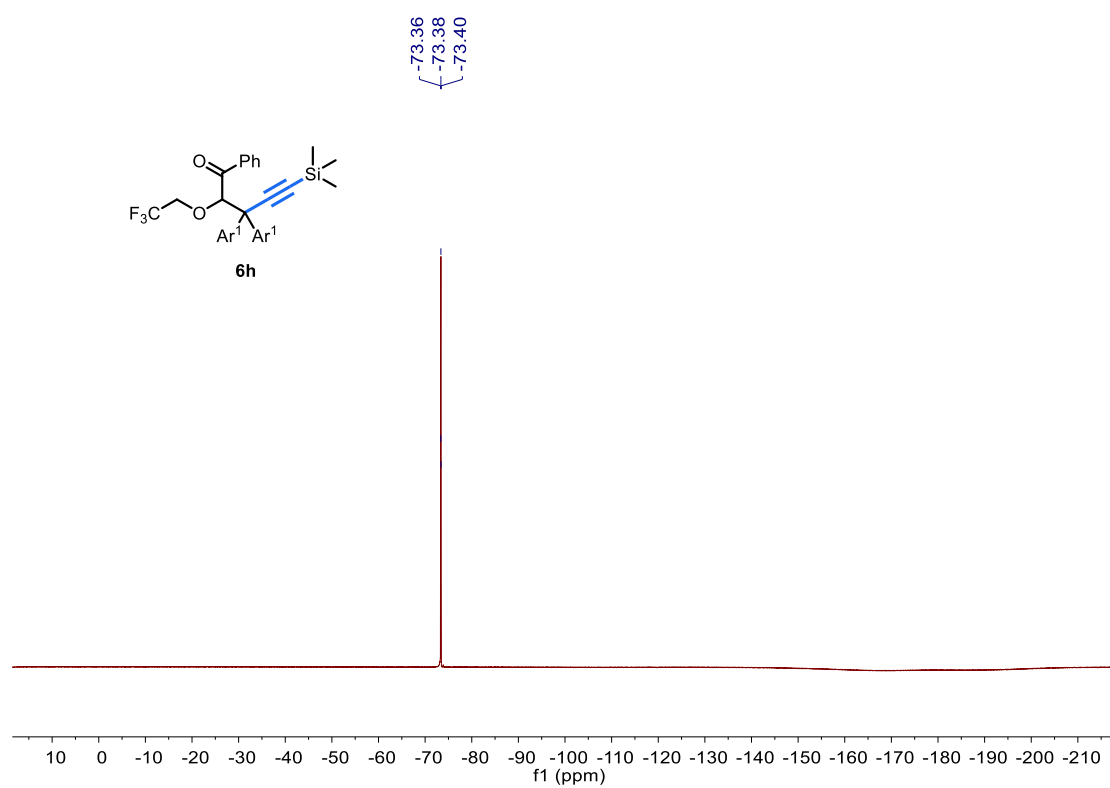

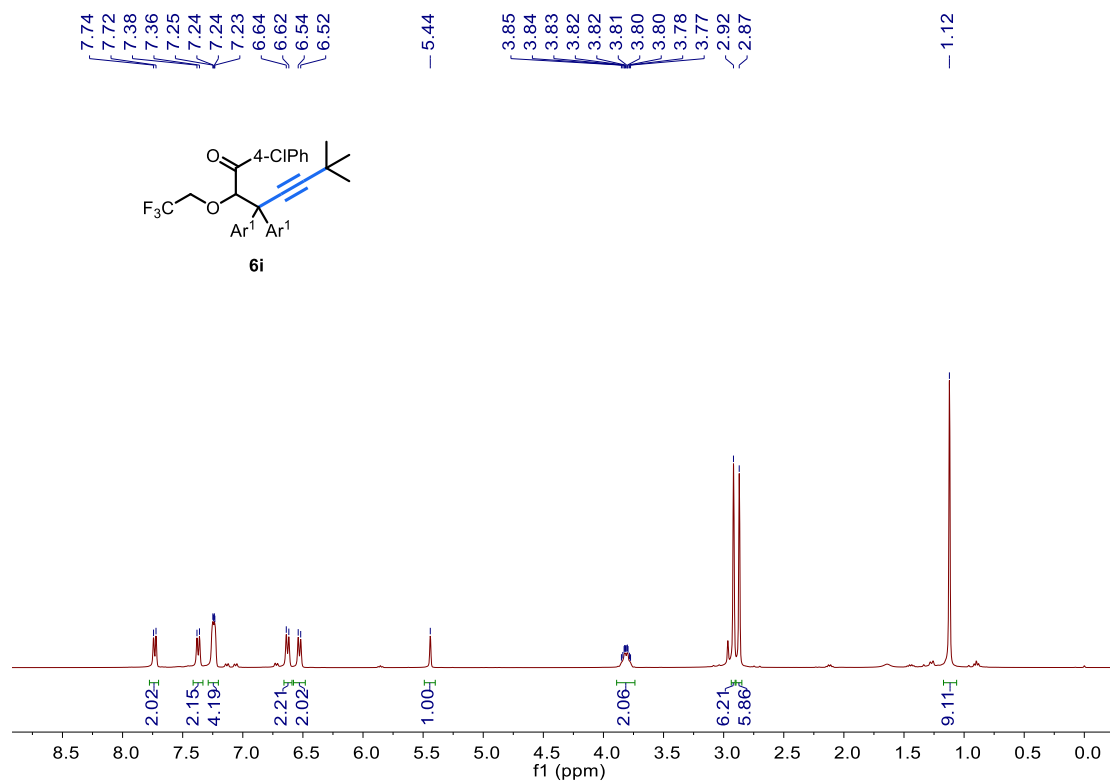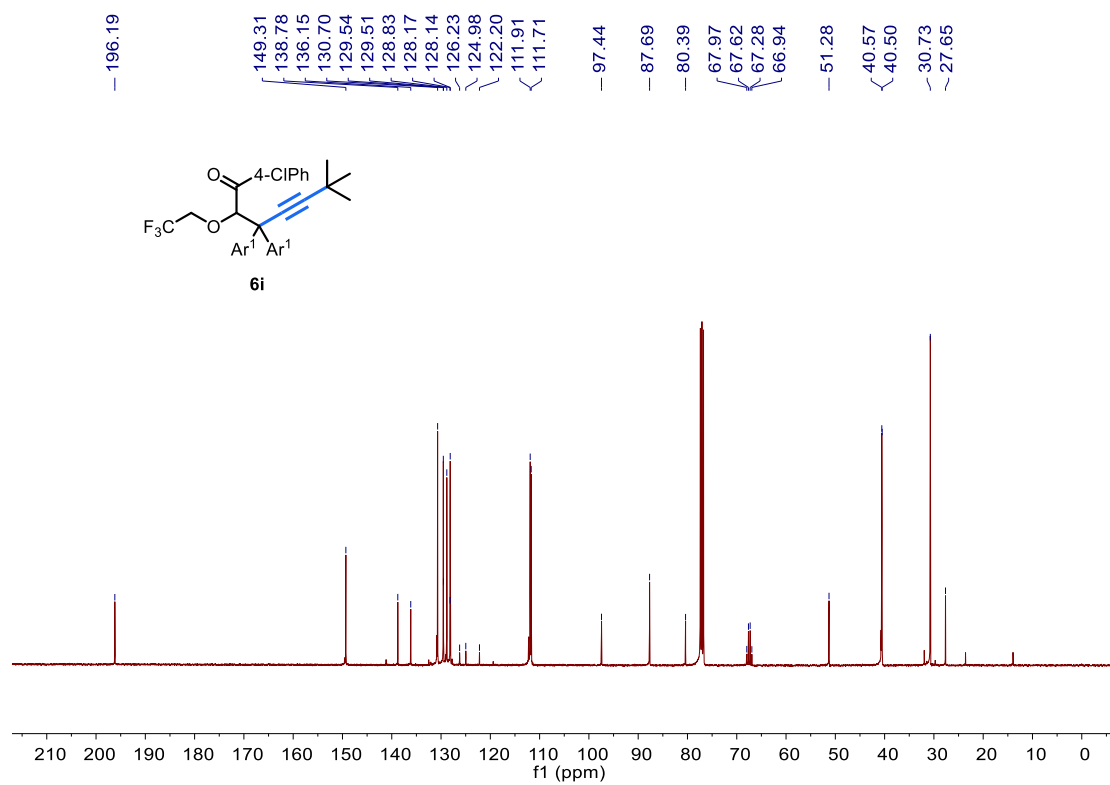

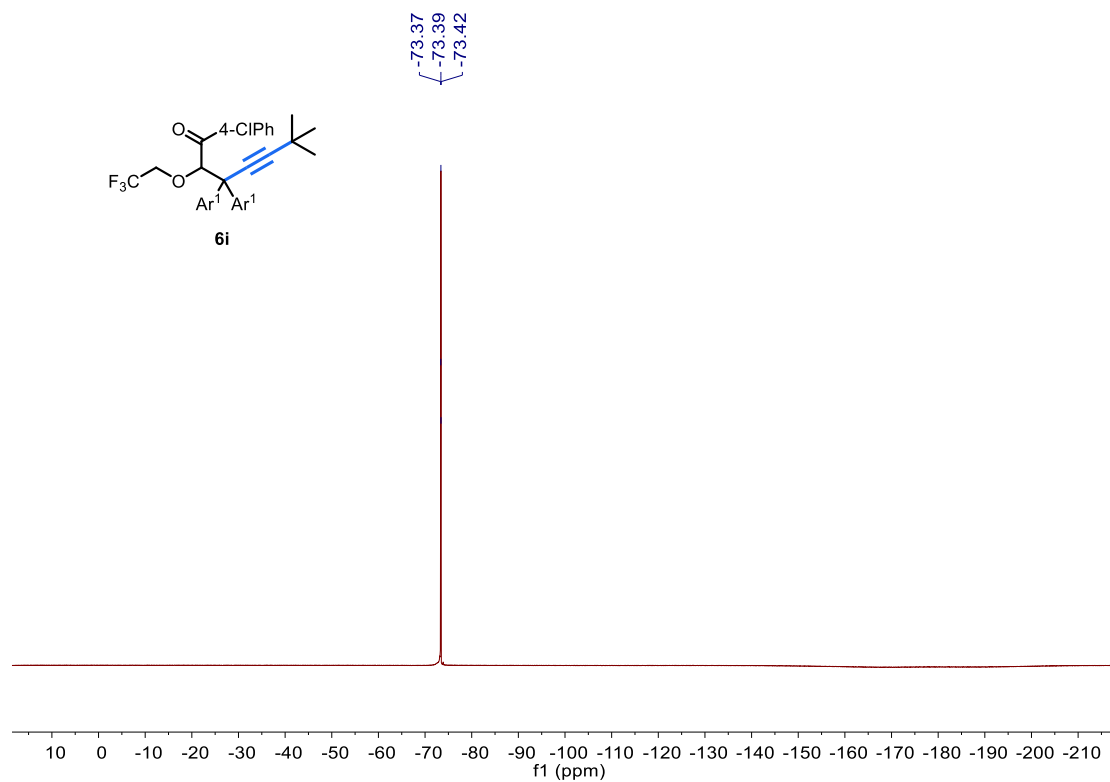

<sup>19</sup>F NMR Spectrum of Compound **6i** (376 MHz, CDCl<sub>3</sub>)

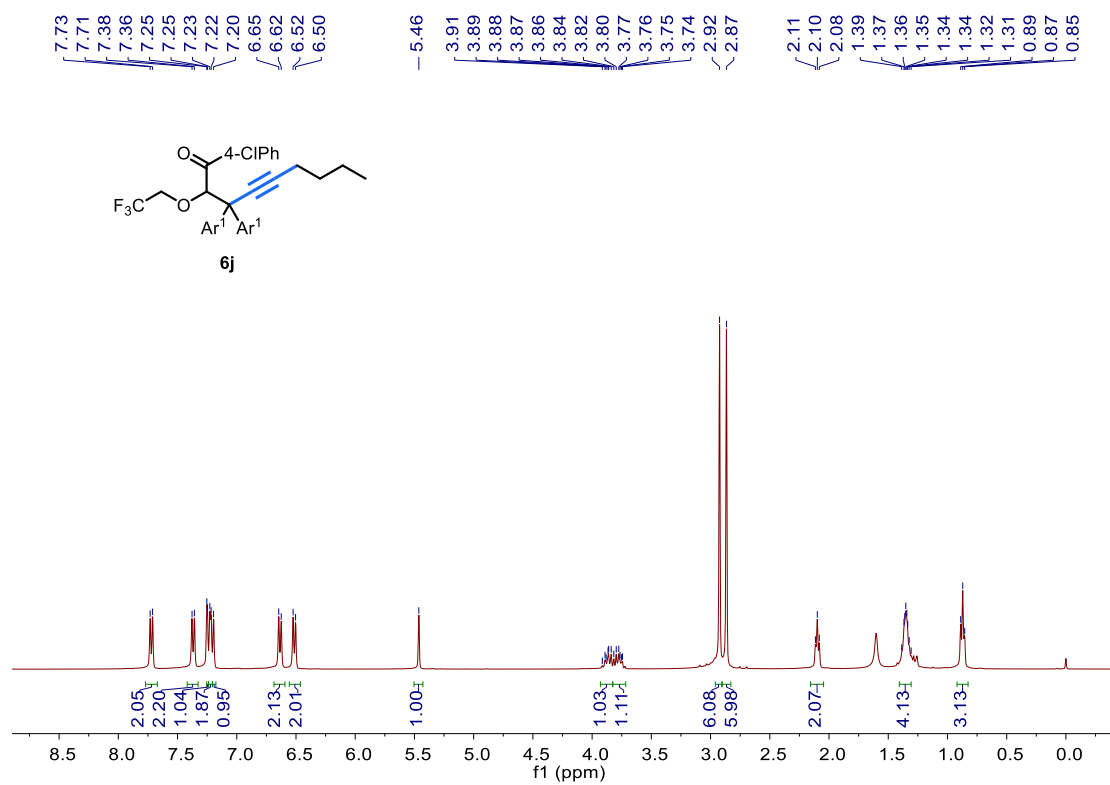

<sup>1</sup>H NMR Spectrum of Compound **6j** (400 MHz, CDCl<sub>3</sub>)

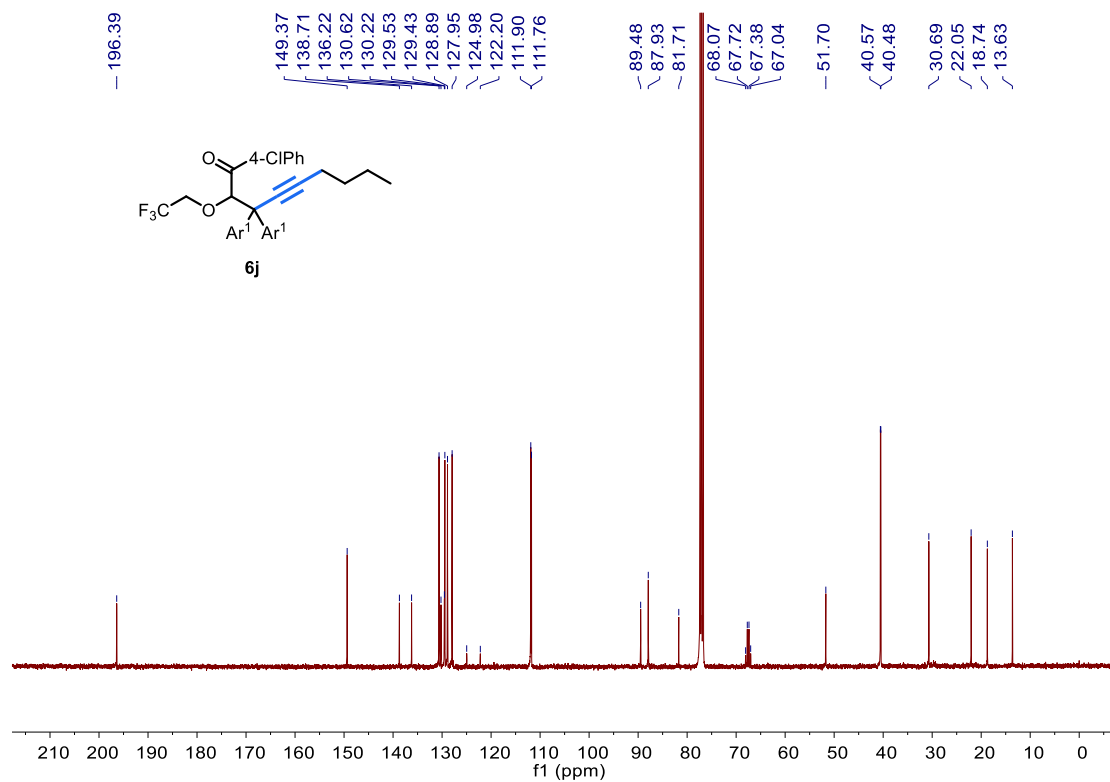

<sup>13</sup>C NMR Spectrum of Compound **6j** (100MHz, CDCl<sub>3</sub>)

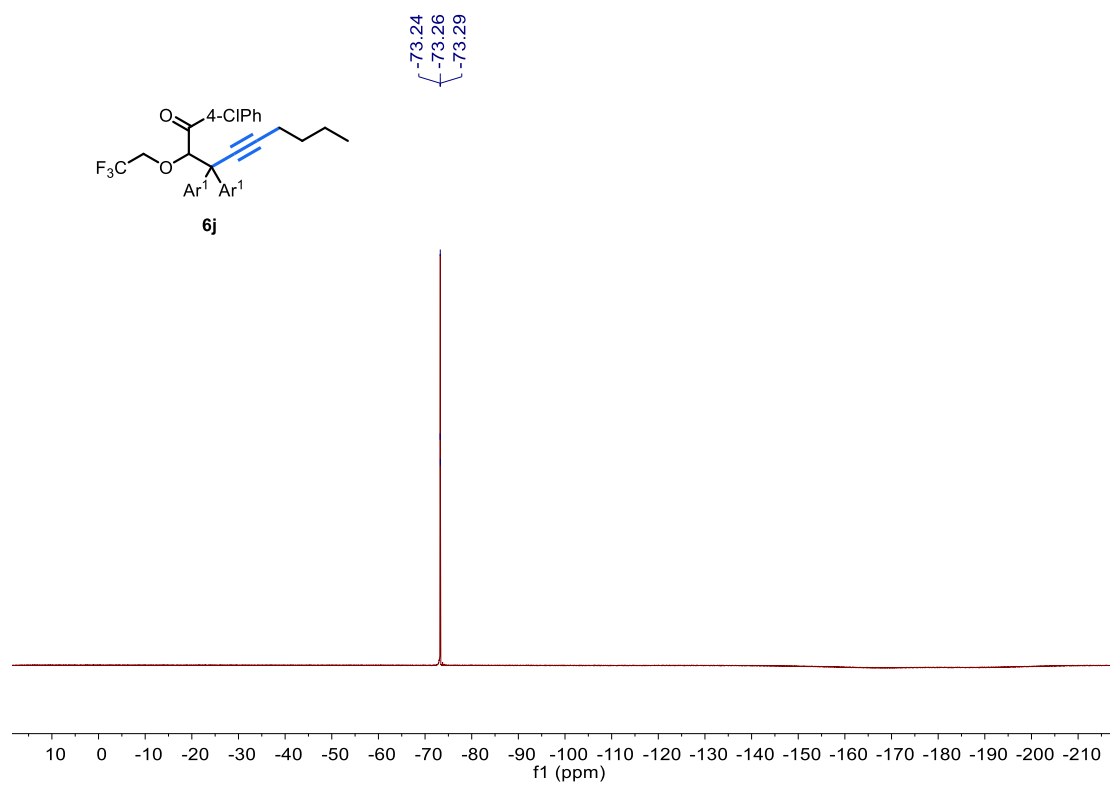

<sup>19</sup>F NMR Spectrum of Compound **6j** (376 MHz, CDCl<sub>3</sub>)

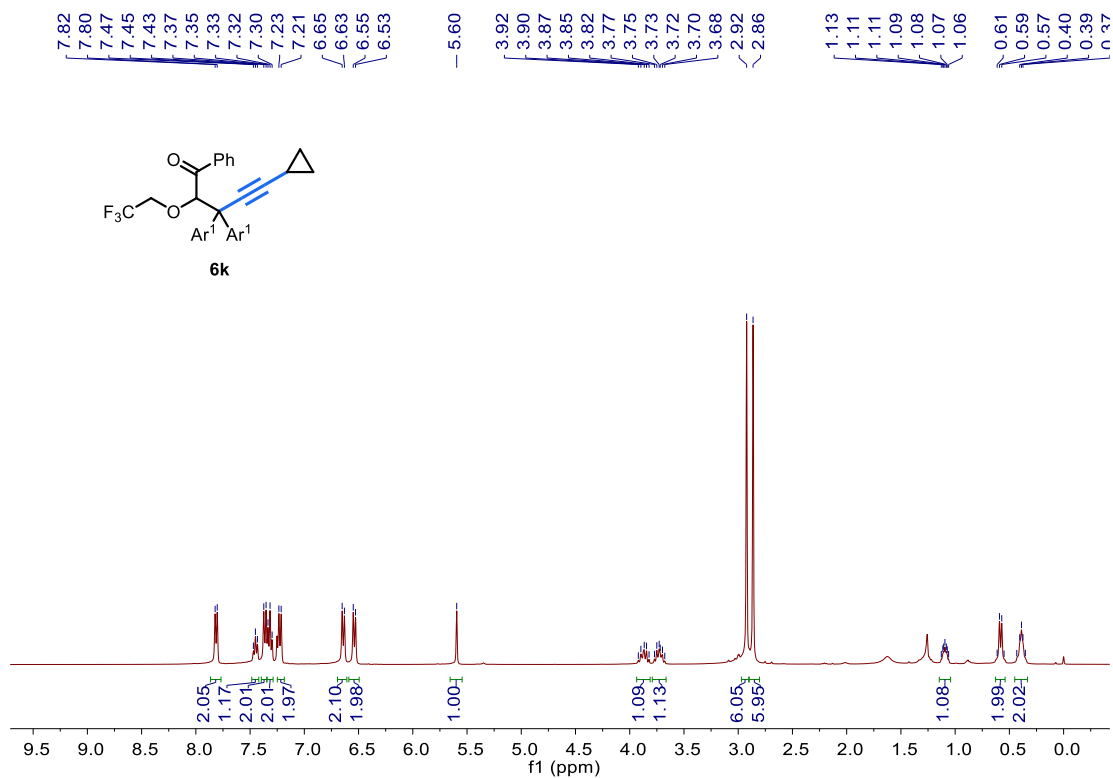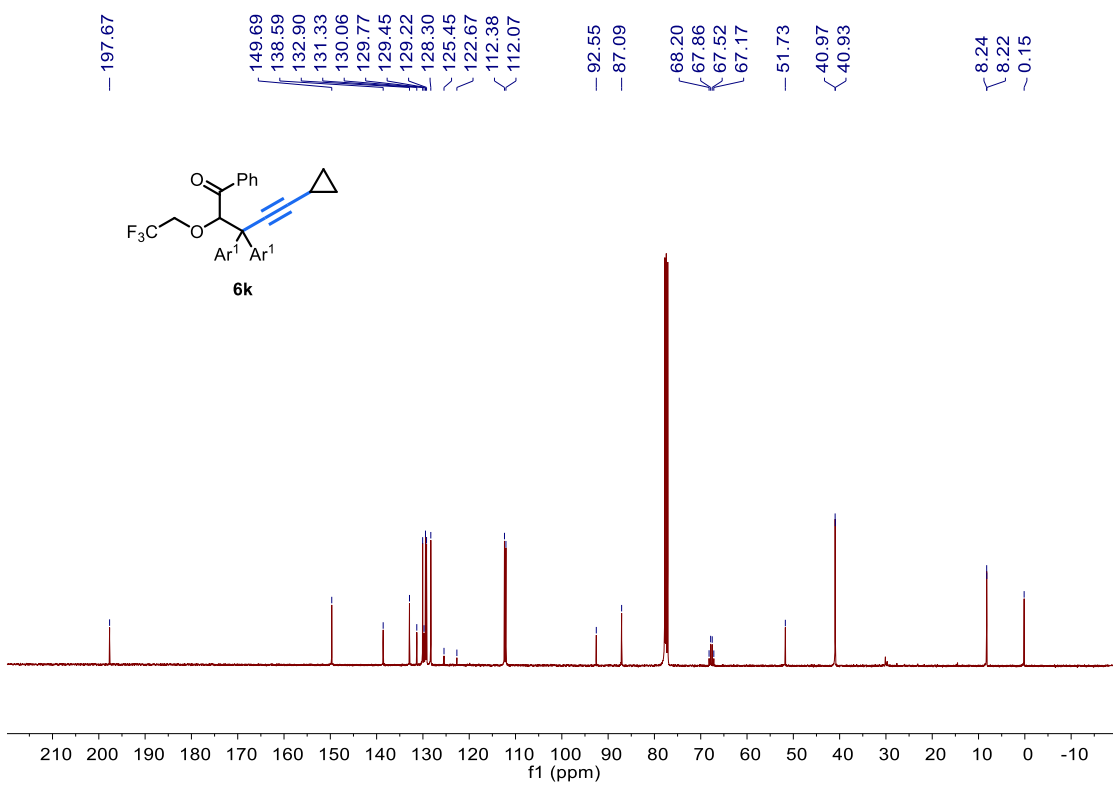

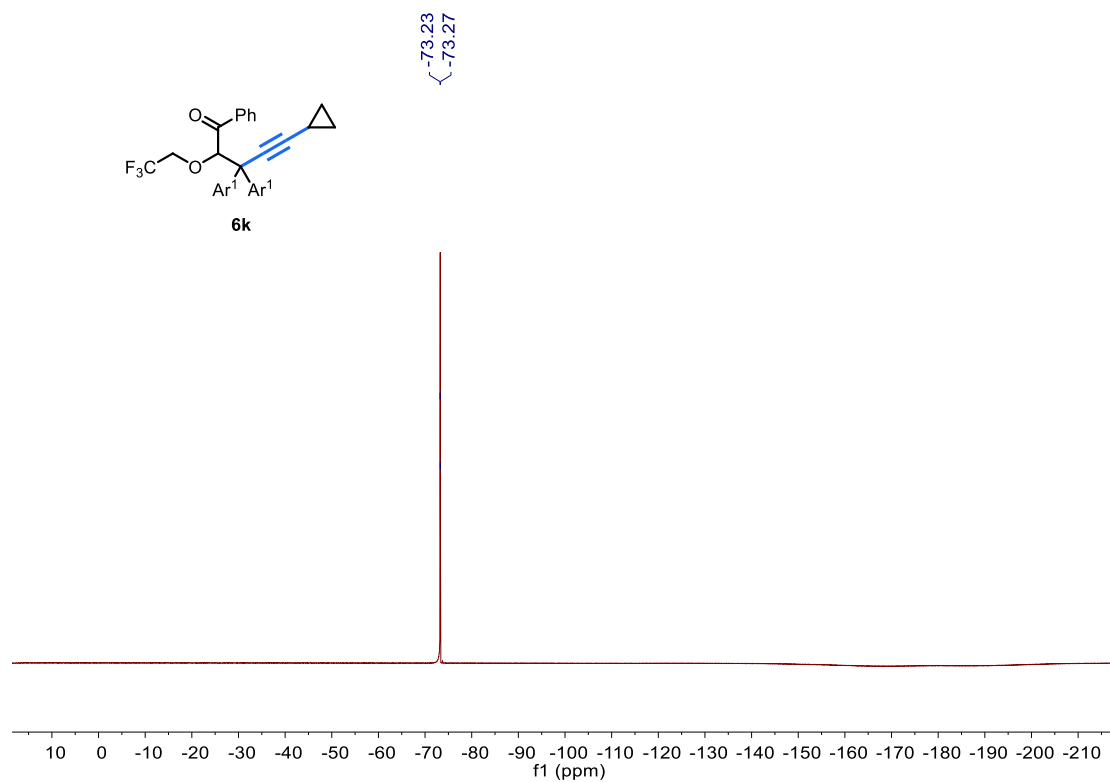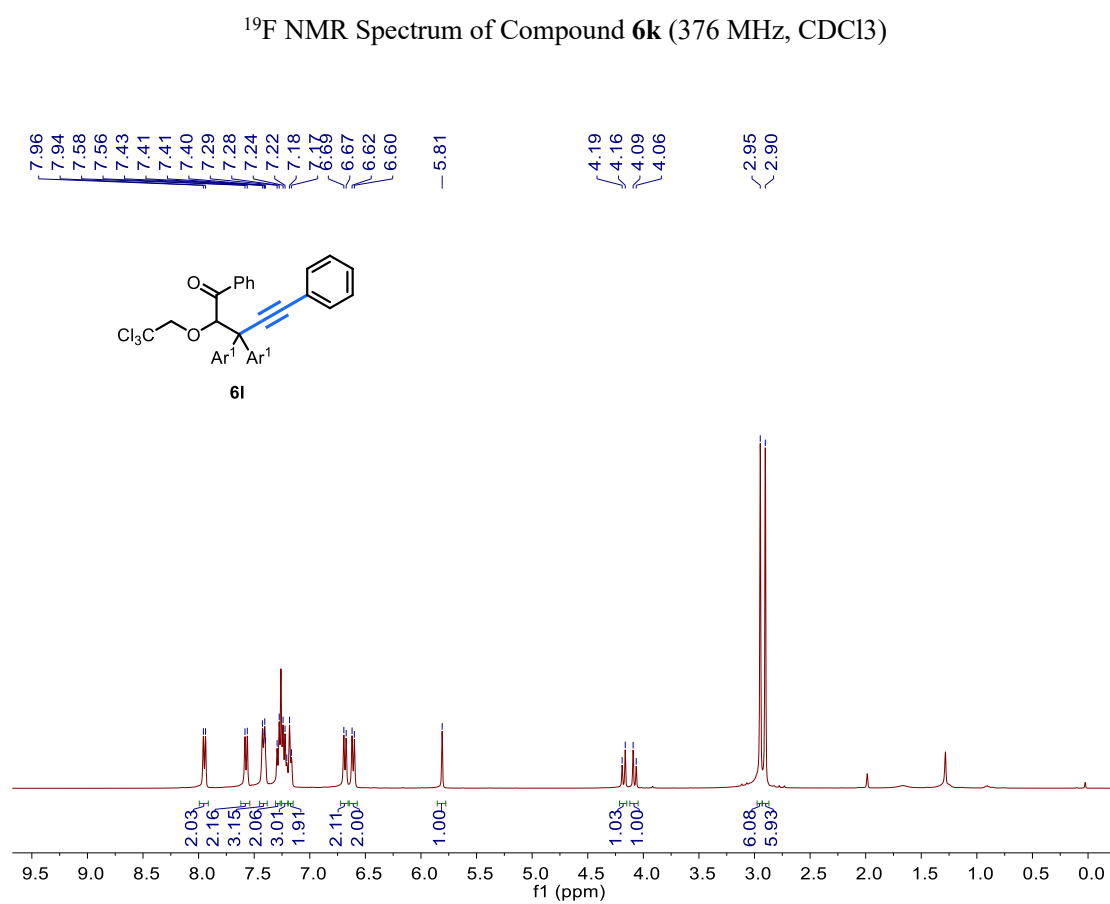

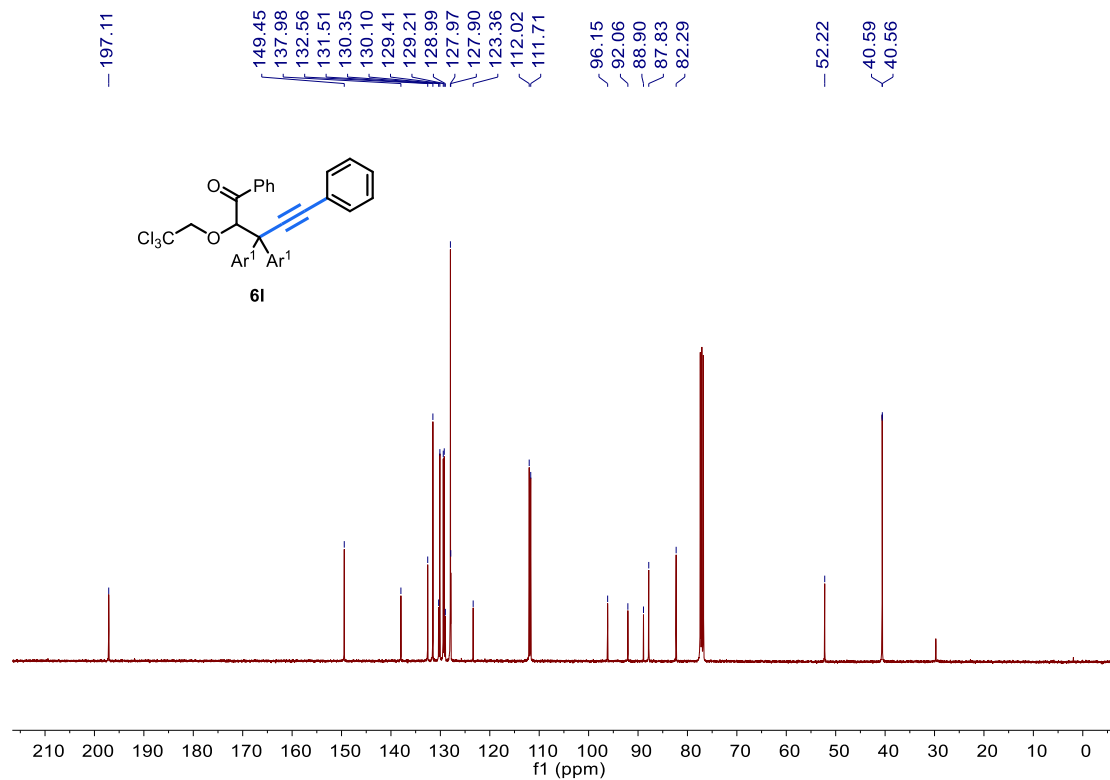

<sup>13</sup>C NMR Spectrum of Compound **6l** (100MHz, CDCl<sub>3</sub>)

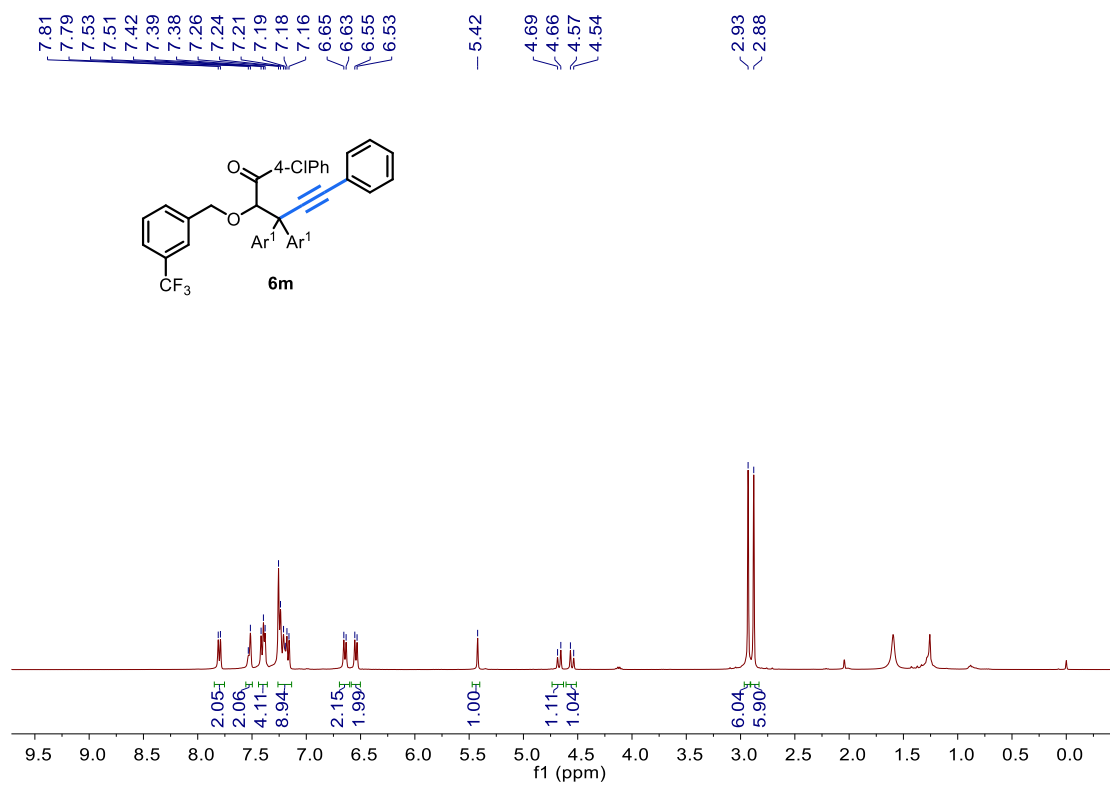

<sup>1</sup>H NMR Spectrum of Compound **6m** (400MHz, CDCl<sub>3</sub>)



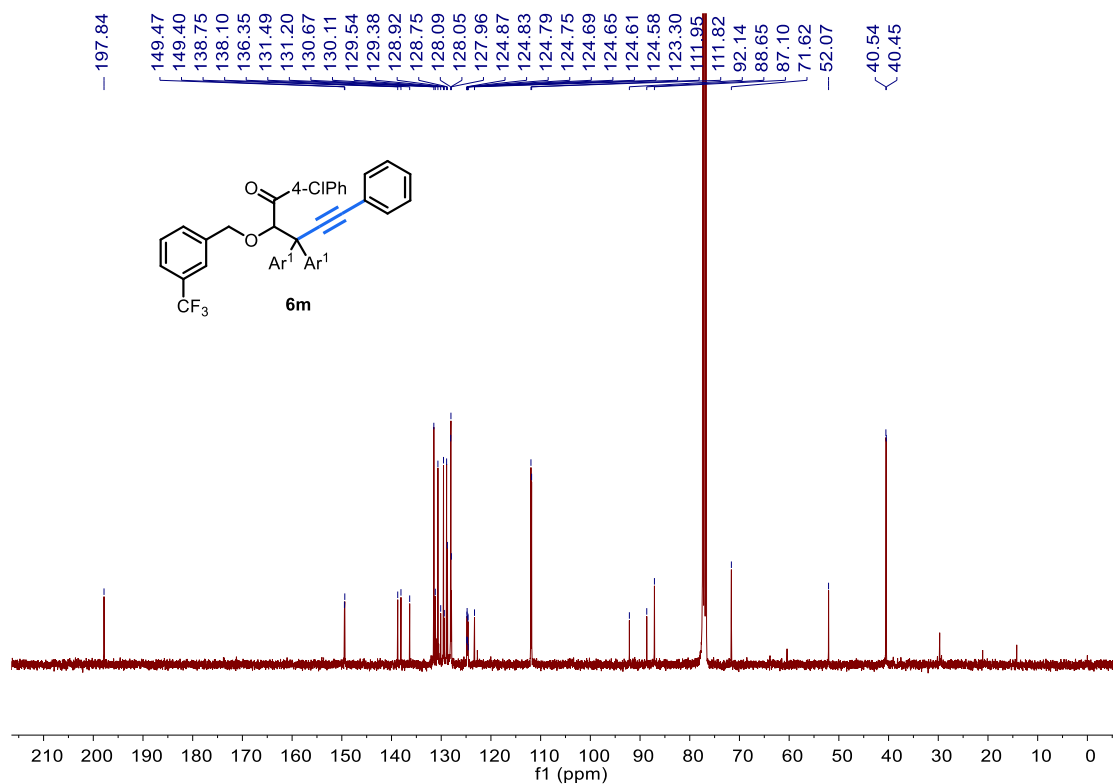

<sup>13</sup>C NMR Spectrum of Compound **6m** (100MHz, CDCl<sub>3</sub>)

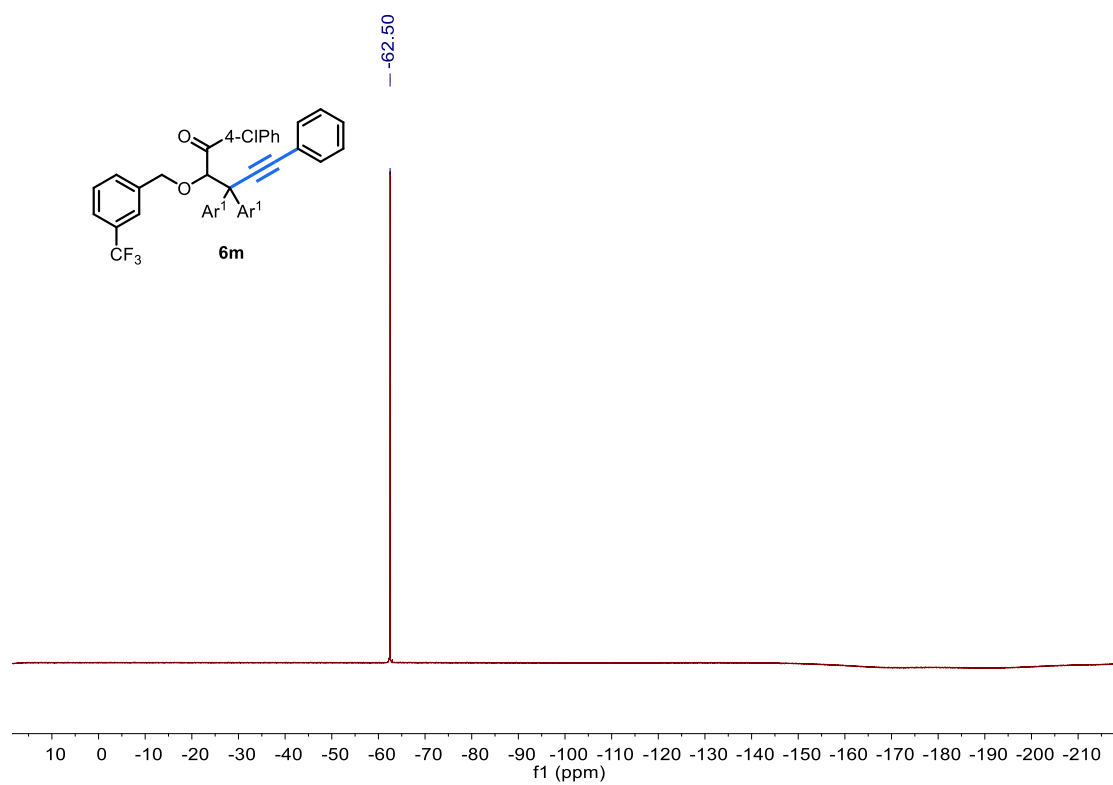

<sup>19</sup>F NMR Spectrum of Compound **6m** (376 MHz, CDCl<sub>3</sub>)

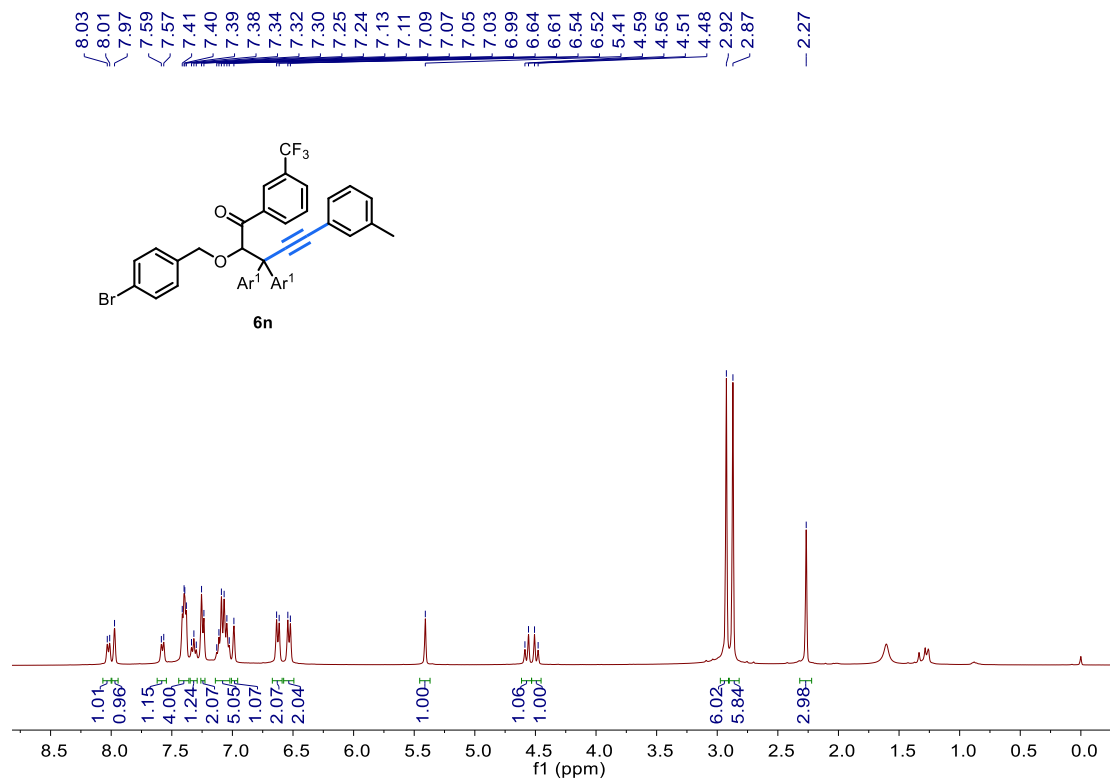

**<sup>1</sup>H NMR Spectrum of Compound 6n (400MHz, CDCl<sub>3</sub>)**

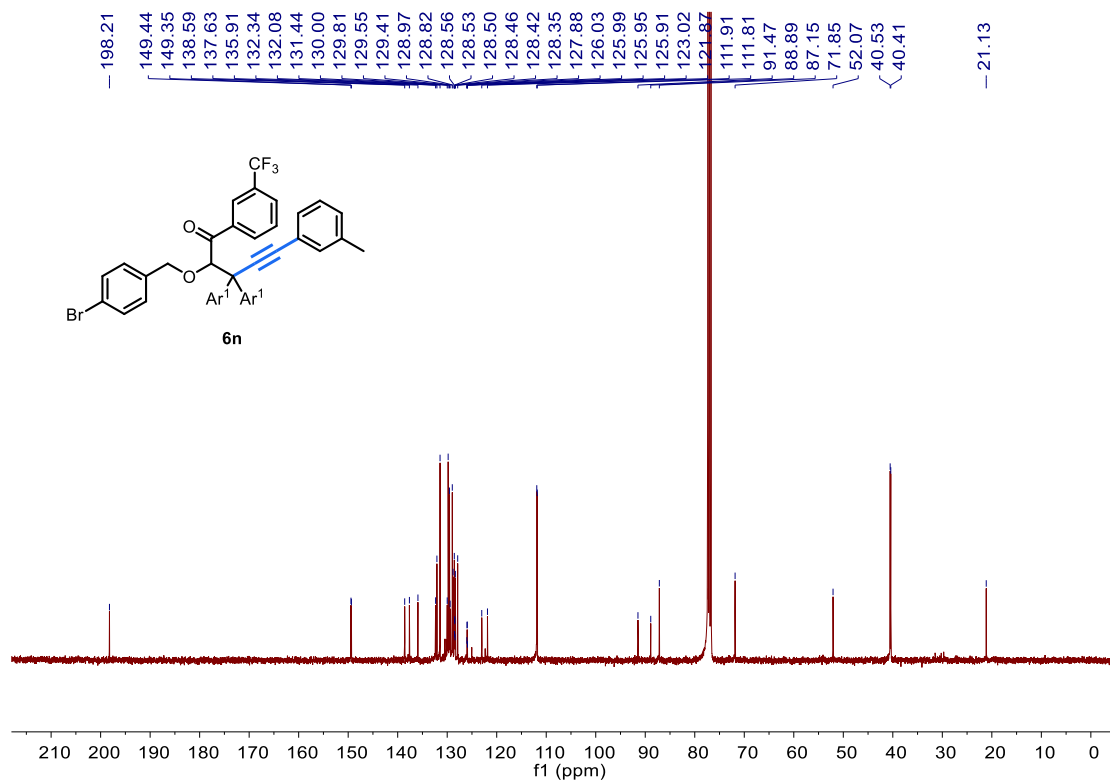

**<sup>13</sup>C NMR Spectrum of Compound 6n (100MHz, CDCl<sub>3</sub>)**

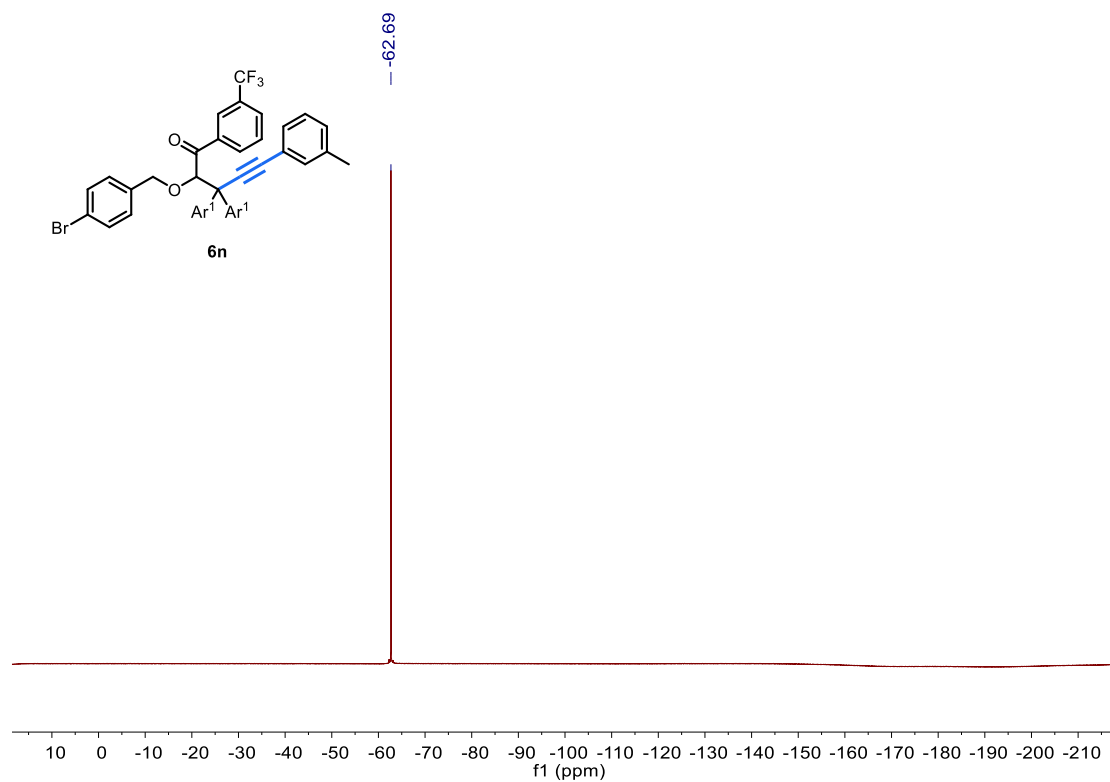

<sup>19</sup>F NMR Spectrum of Compound **6n** (376 MHz, CDCl<sub>3</sub>)

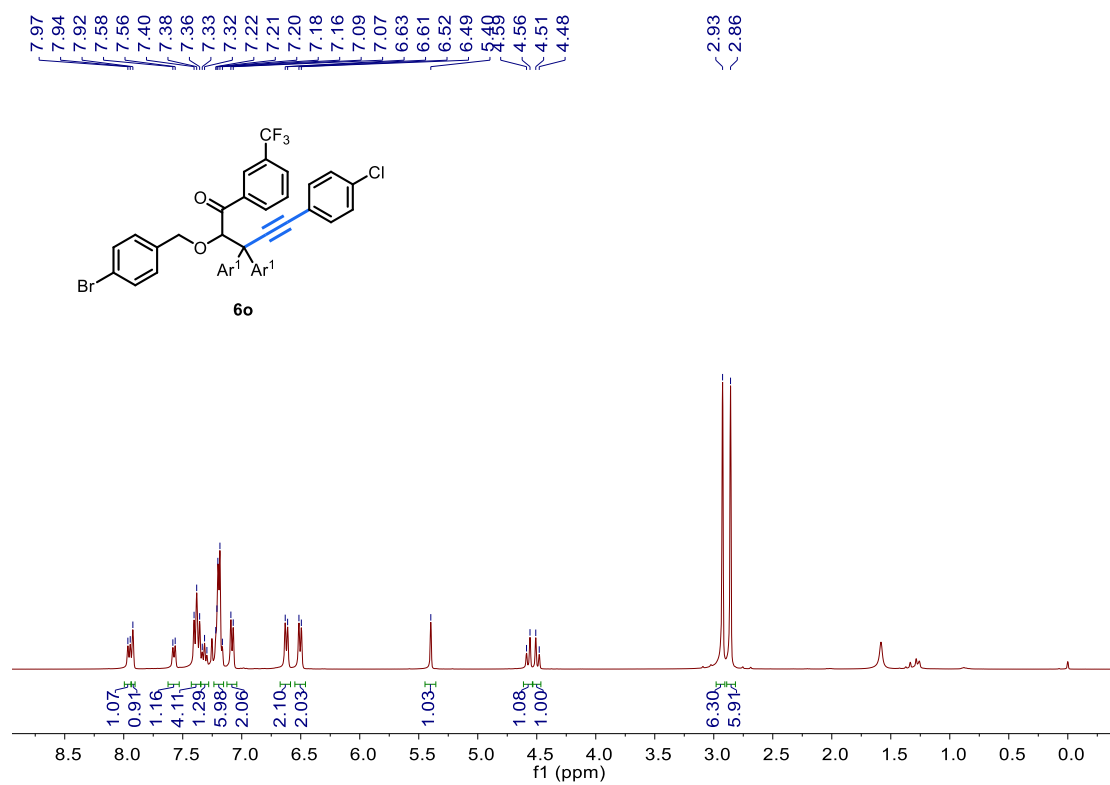

<sup>1</sup>H NMR Spectrum of Compound **6o** (400MHz, CDCl<sub>3</sub>)

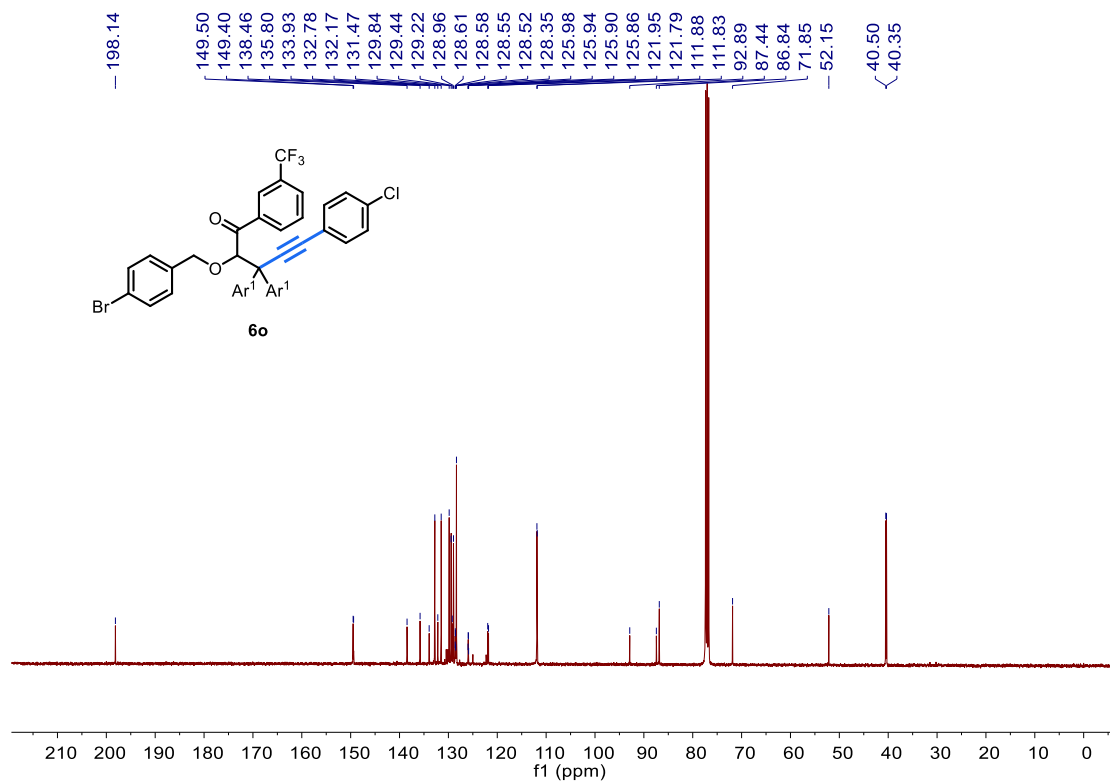

**13C NMR Spectrum of Compound 6o (100MHz, CDCl3)**

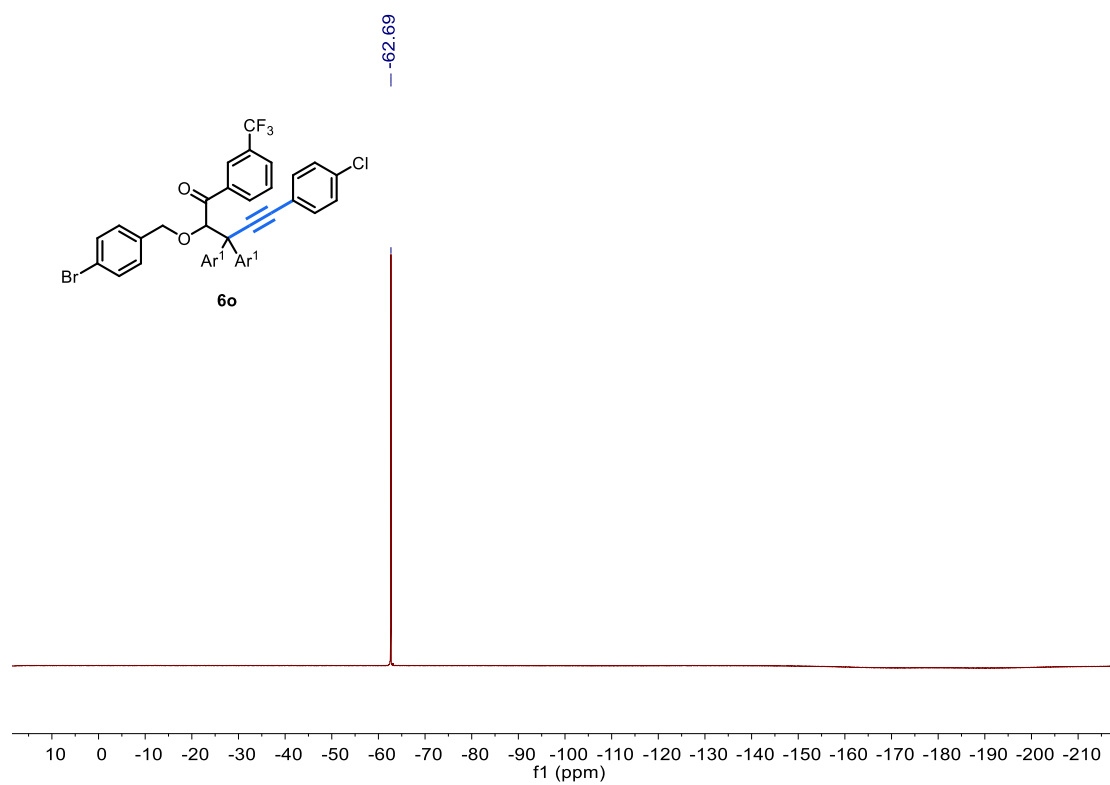

**19F NMR Spectrum of Compound 6o (376 MHz, CDCl3)**

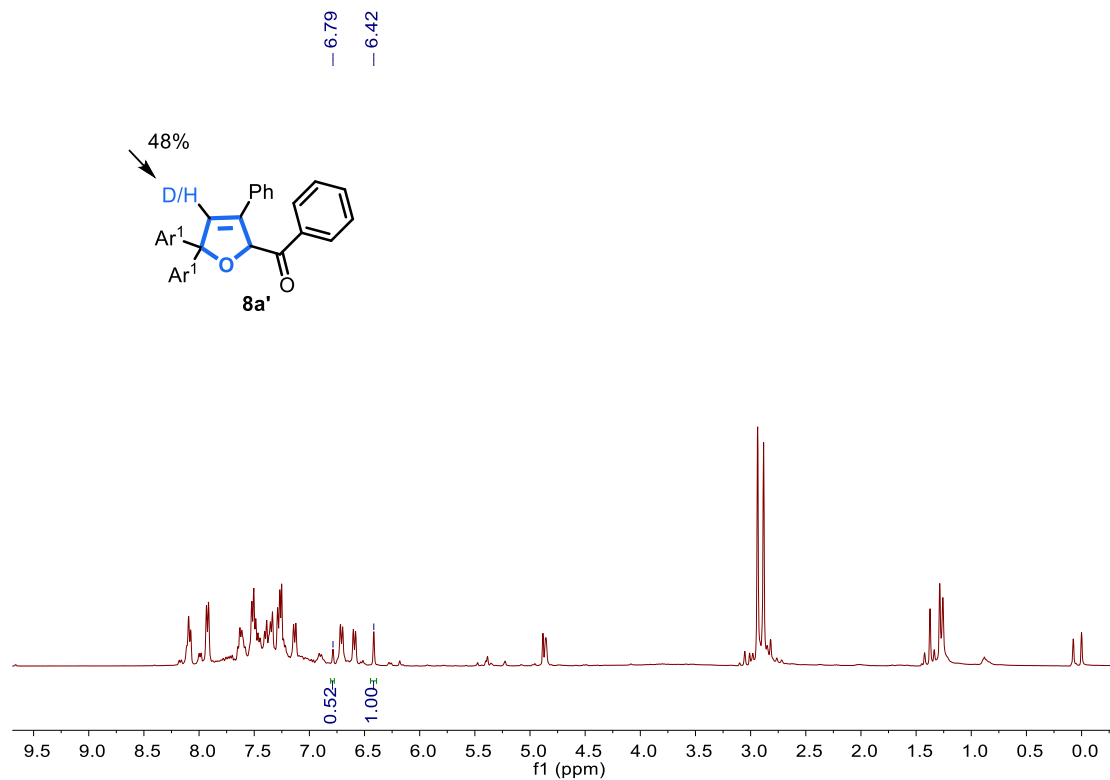

<sup>1</sup>H NMR Spectrum of Compound **8a'** (400MHz, CDCl<sub>3</sub>)

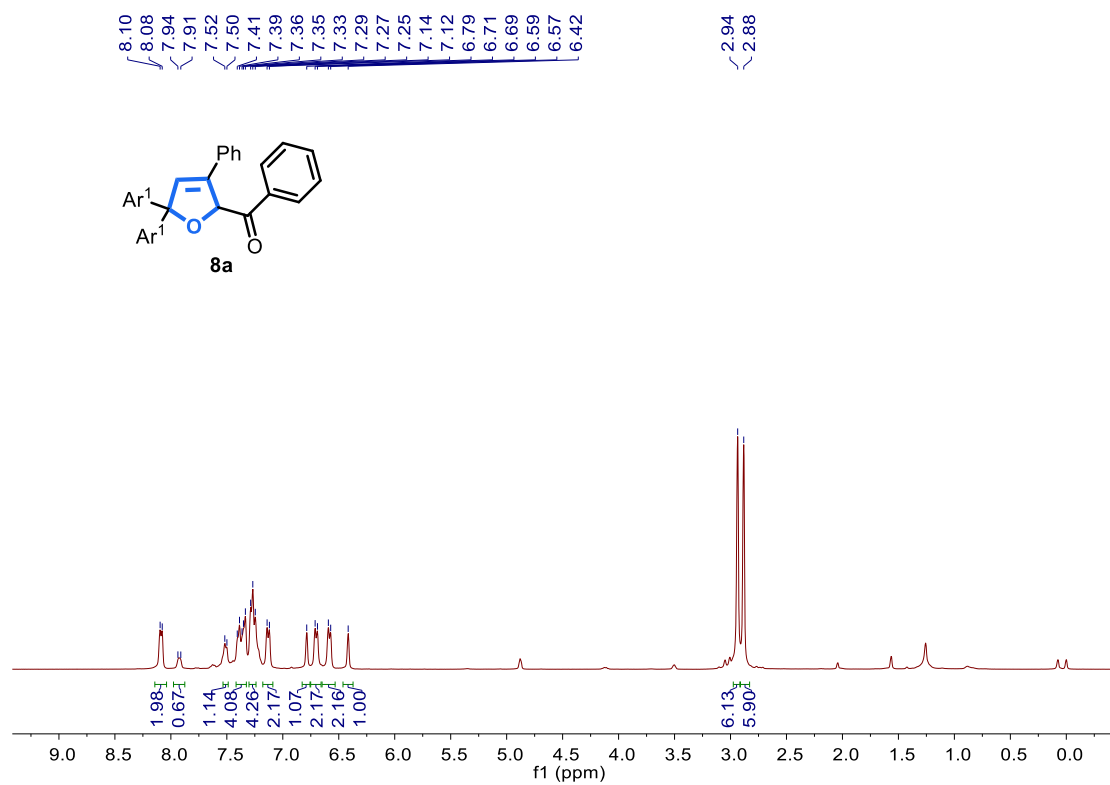

<sup>1</sup>H NMR Spectrum of Compound **8a** (400MHz, CDCl<sub>3</sub>)

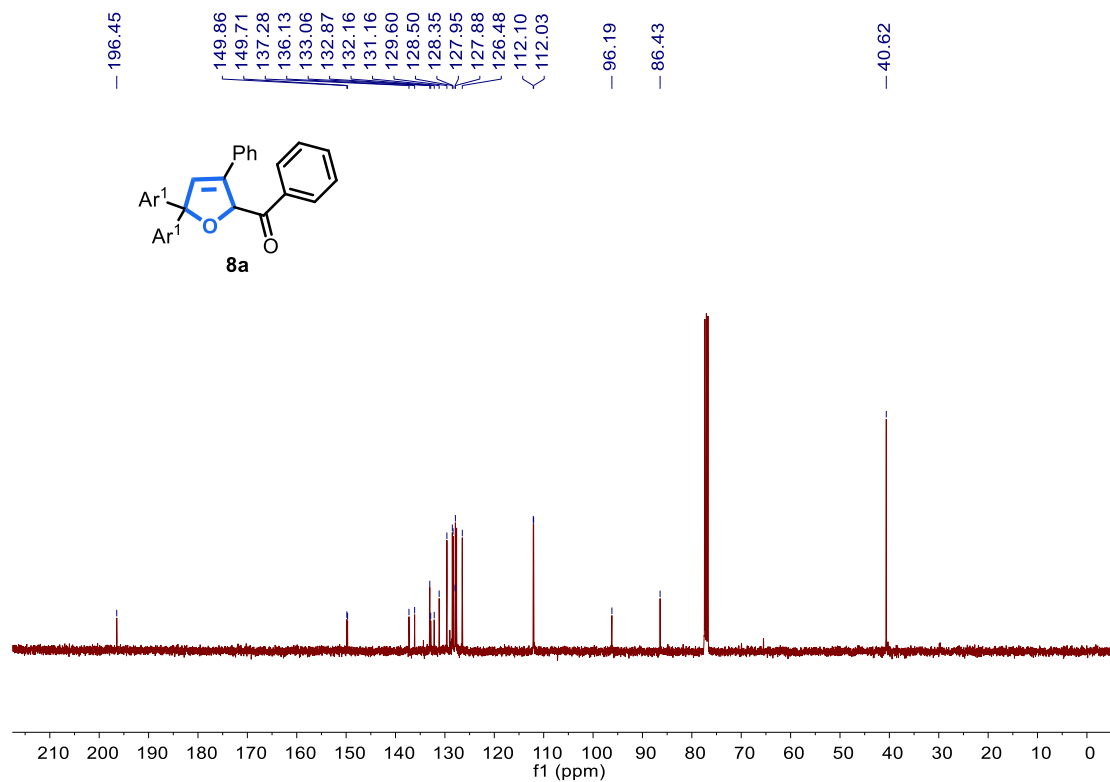

<sup>13</sup>C NMR Spectrum of Compound **8a** (100MHz, CDCl<sub>3</sub>)

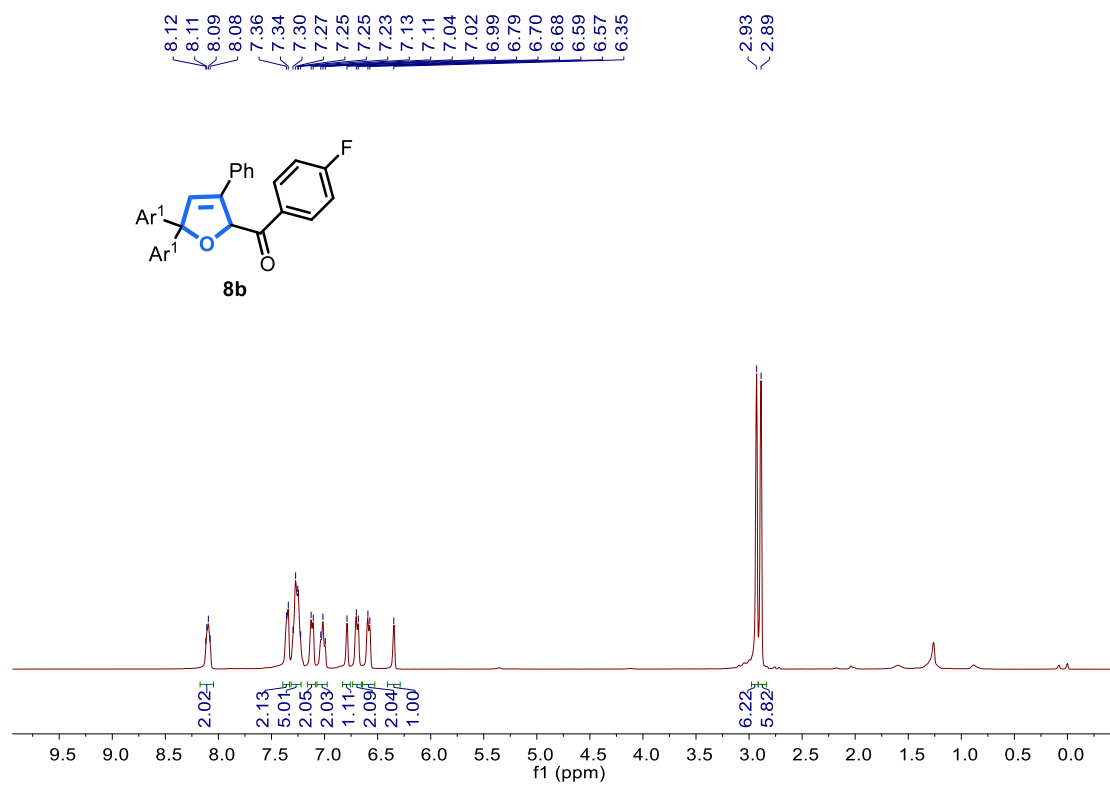

<sup>1</sup>H NMR Spectrum of Compound **8b** (400MHz, CDCl<sub>3</sub>)

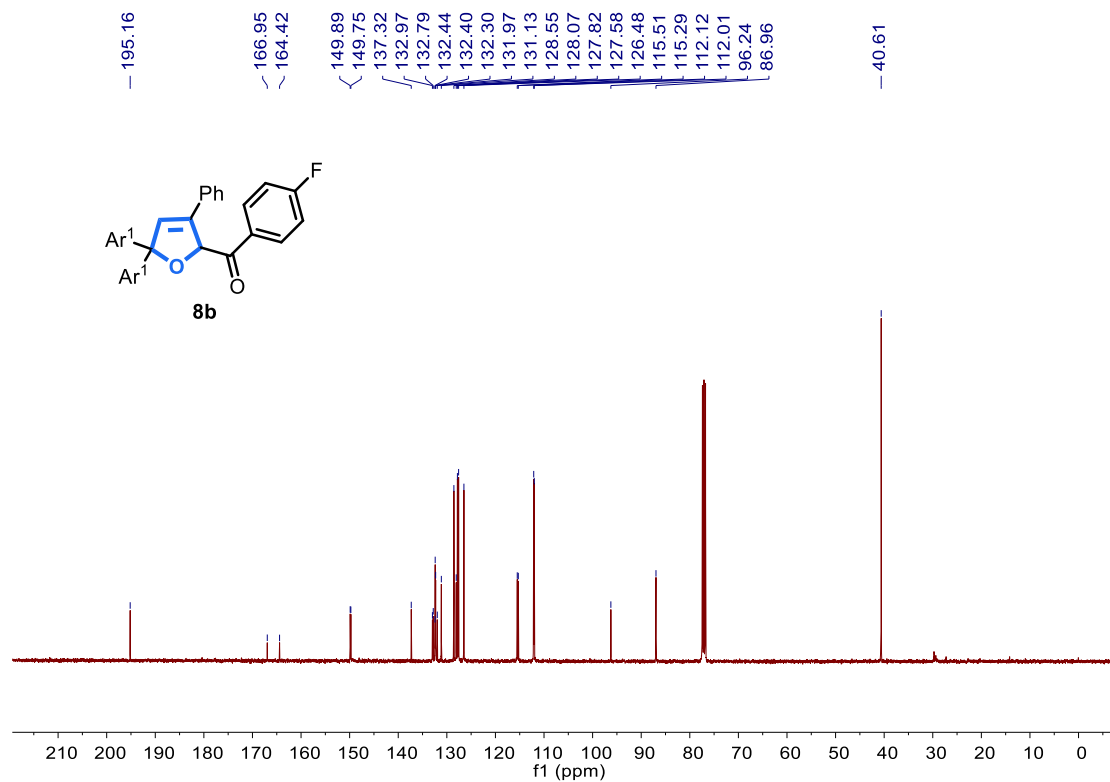

<sup>13</sup>C NMR Spectrum of Compound **8b** (100MHz, CDCl<sub>3</sub>)

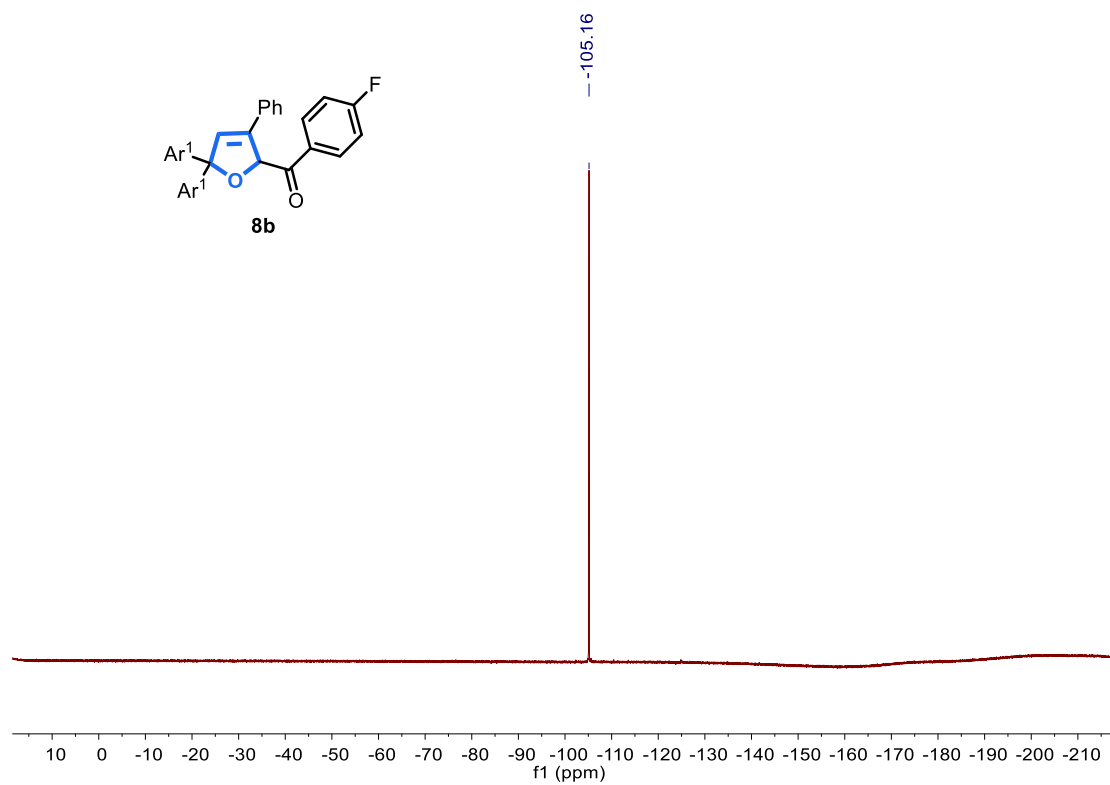

<sup>19</sup>F NMR Spectrum of Compound **8b** (376 MHz, CDCl<sub>3</sub>)

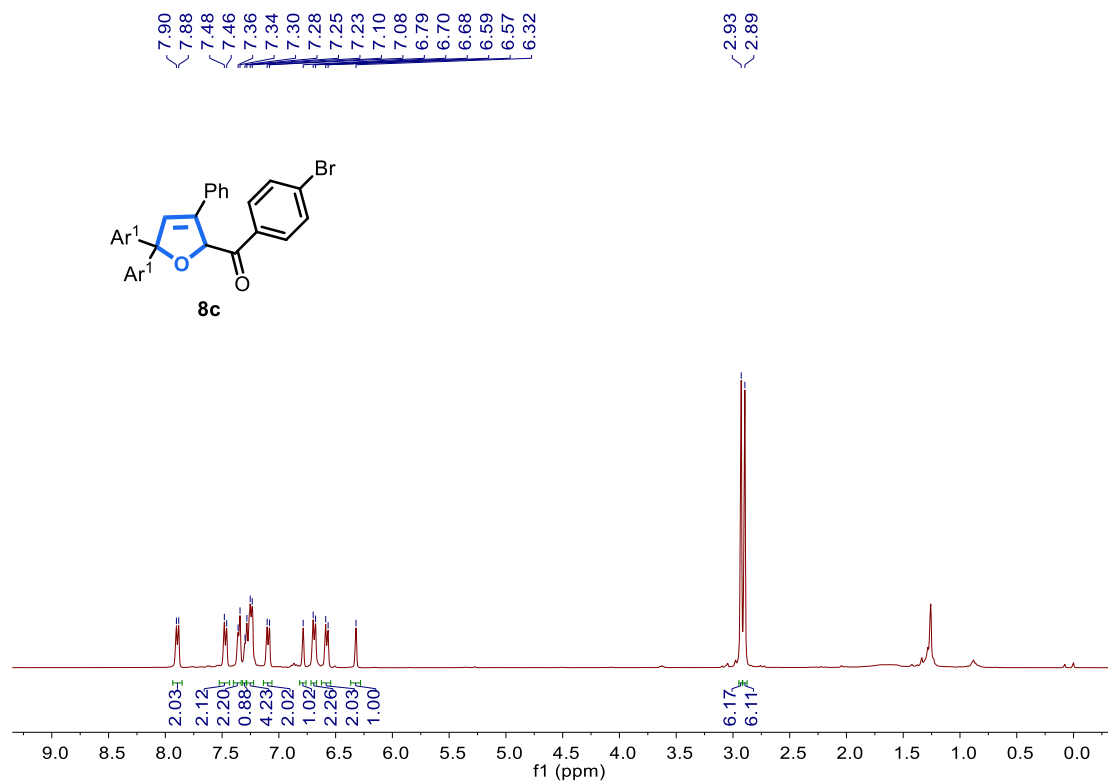

<sup>1</sup>H NMR Spectrum of Compound **8c** (400MHz, CDCl<sub>3</sub>)

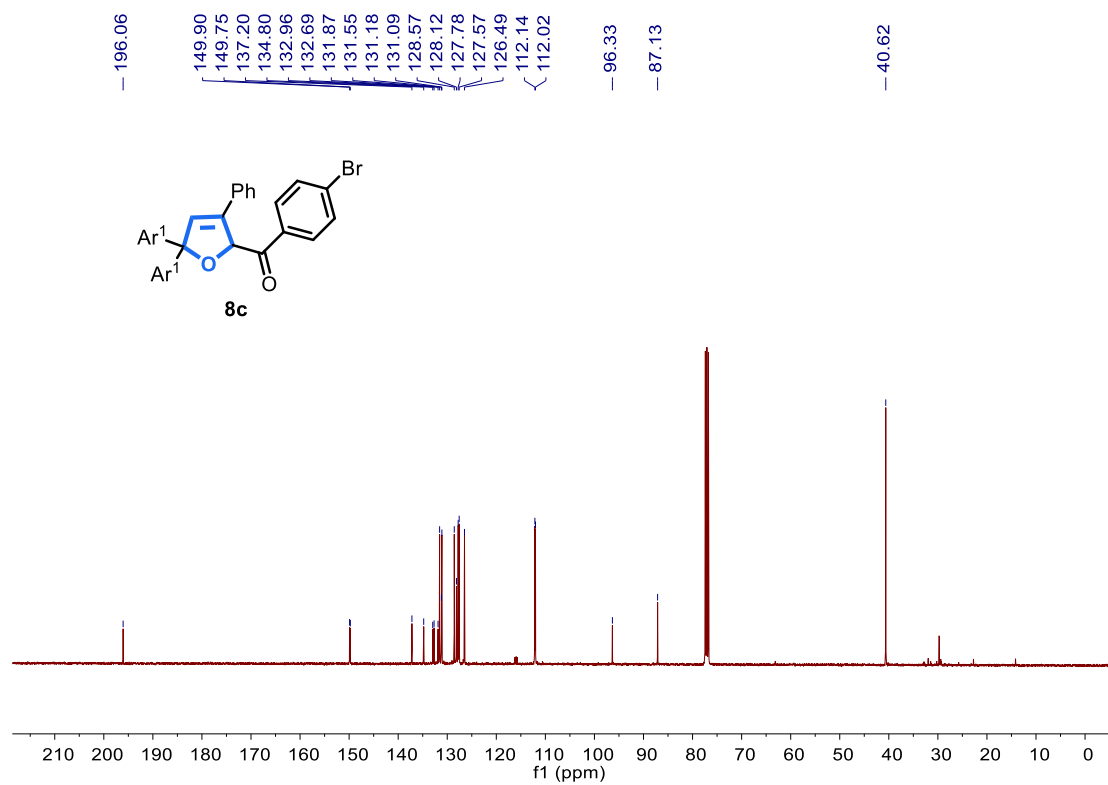

<sup>13</sup>C NMR Spectrum of Compound **8c** (100MHz, CDCl<sub>3</sub>)



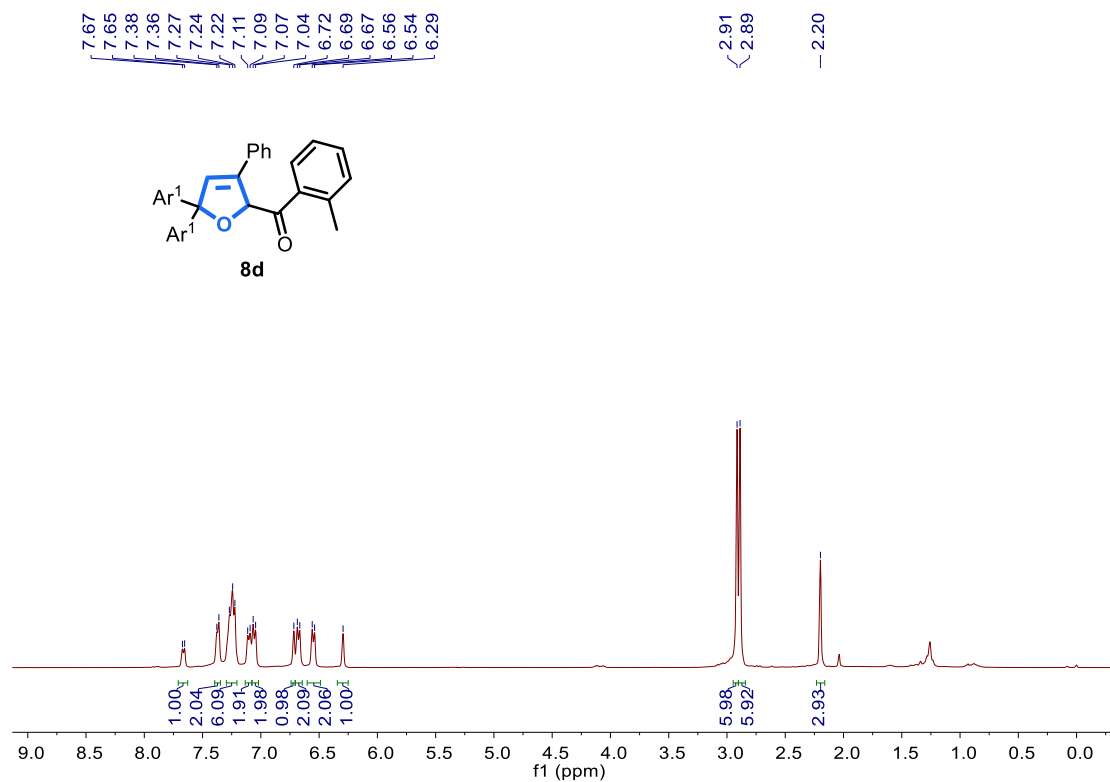

**<sup>1</sup>H NMR Spectrum of Compound 8d (400MHz, CDCl<sub>3</sub>)**

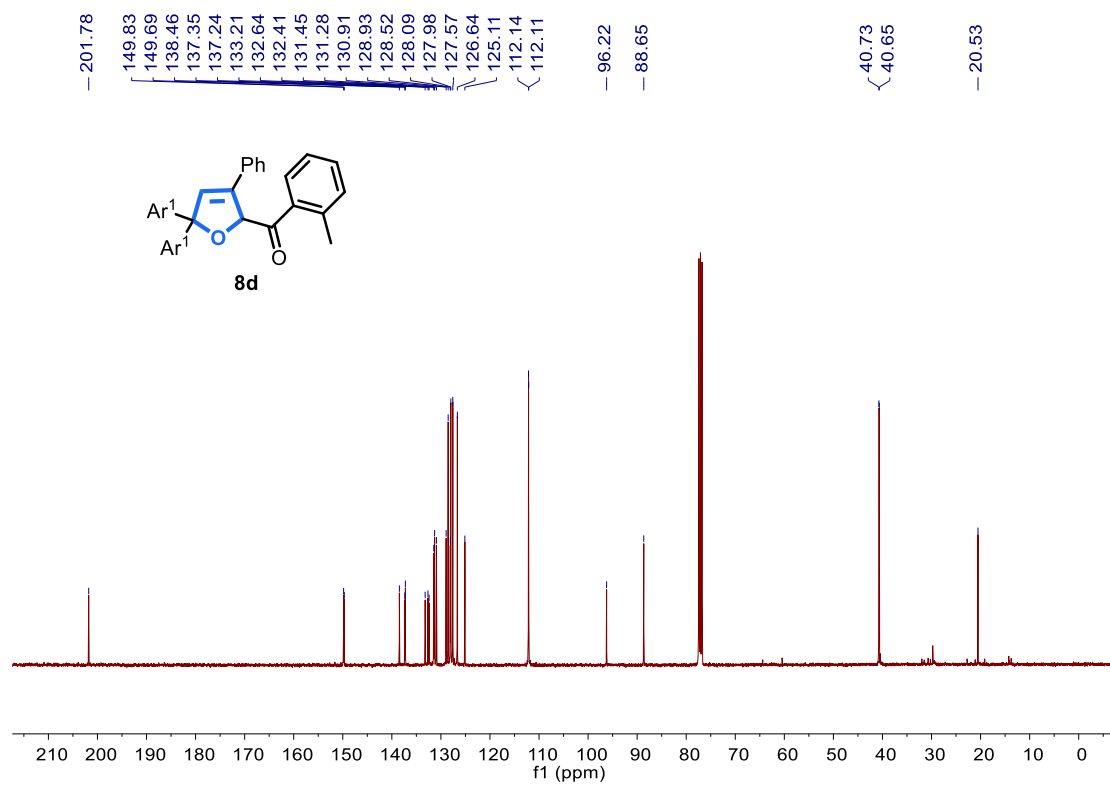

**<sup>13</sup>C NMR Spectrum of Compound 8d (100MHz, CDCl<sub>3</sub>)**

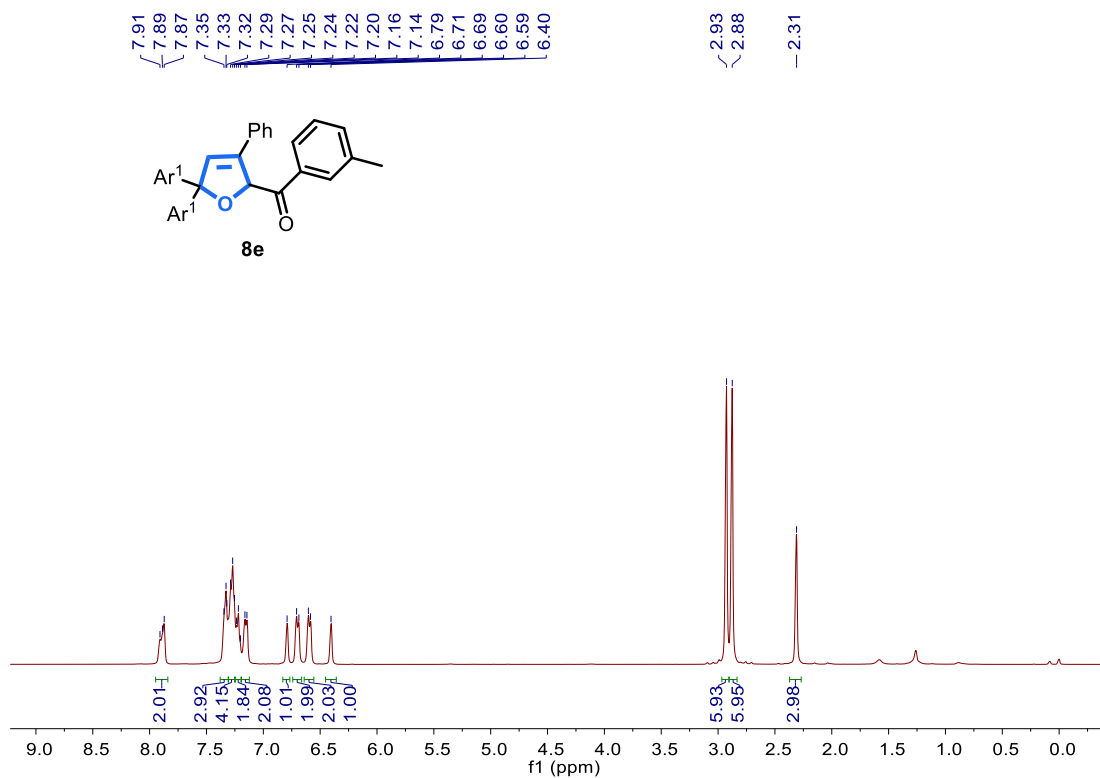

**<sup>1</sup>H NMR Spectrum of Compound 8e (400MHz, CDCl<sub>3</sub>)**

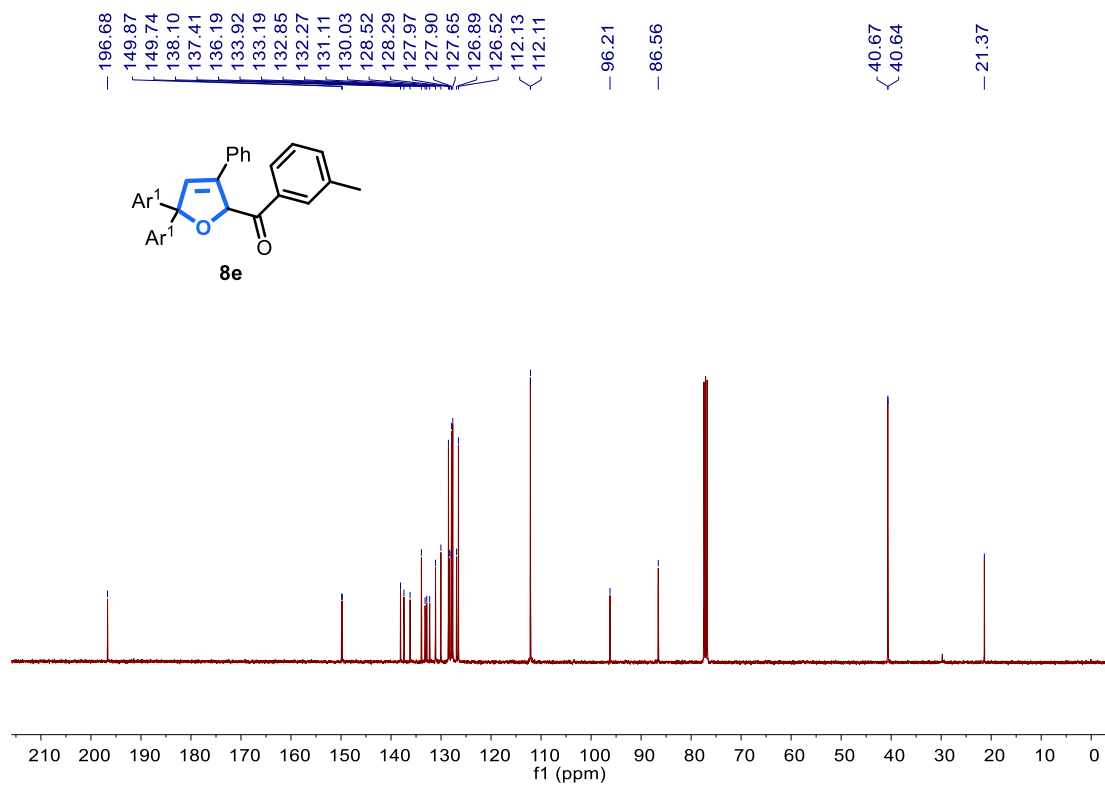

**<sup>13</sup>C NMR Spectrum of Compound 8e (100MHz, CDCl<sub>3</sub>)**

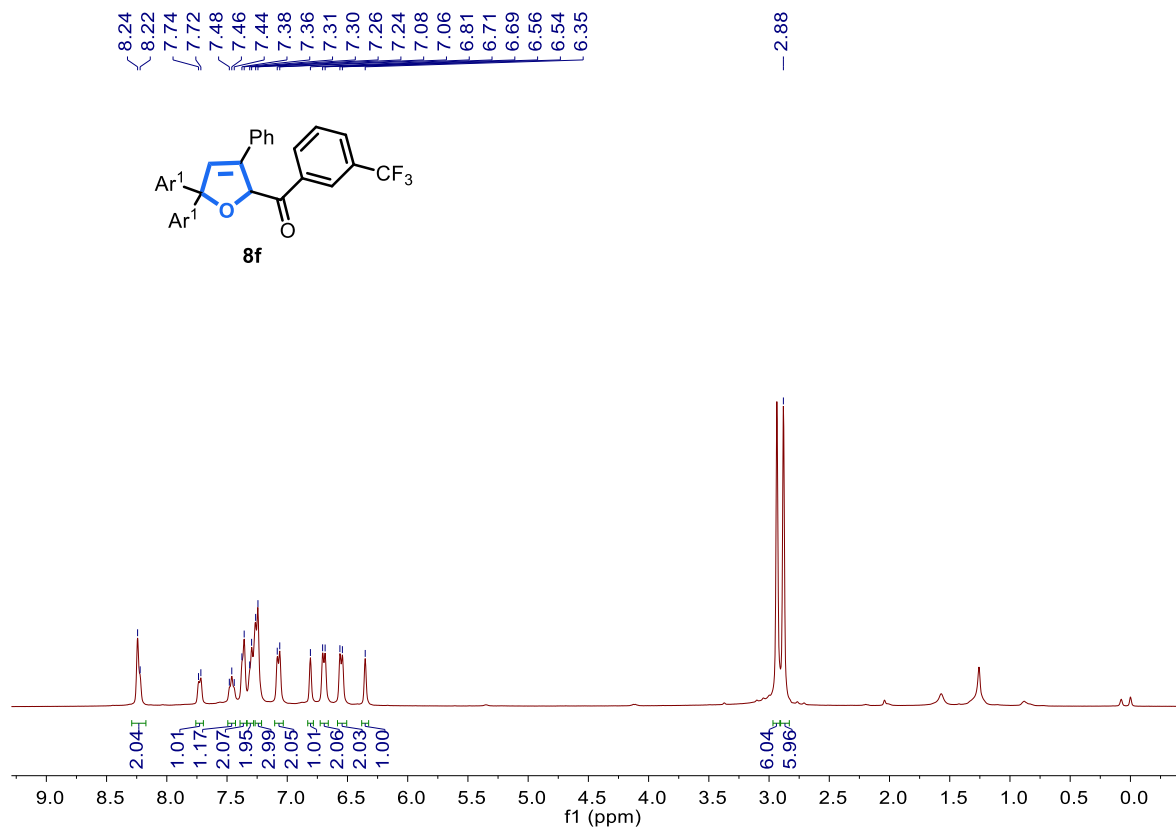

<sup>1</sup>H NMR Spectrum of Compound **8f** (400MHz, CDCl<sub>3</sub>)

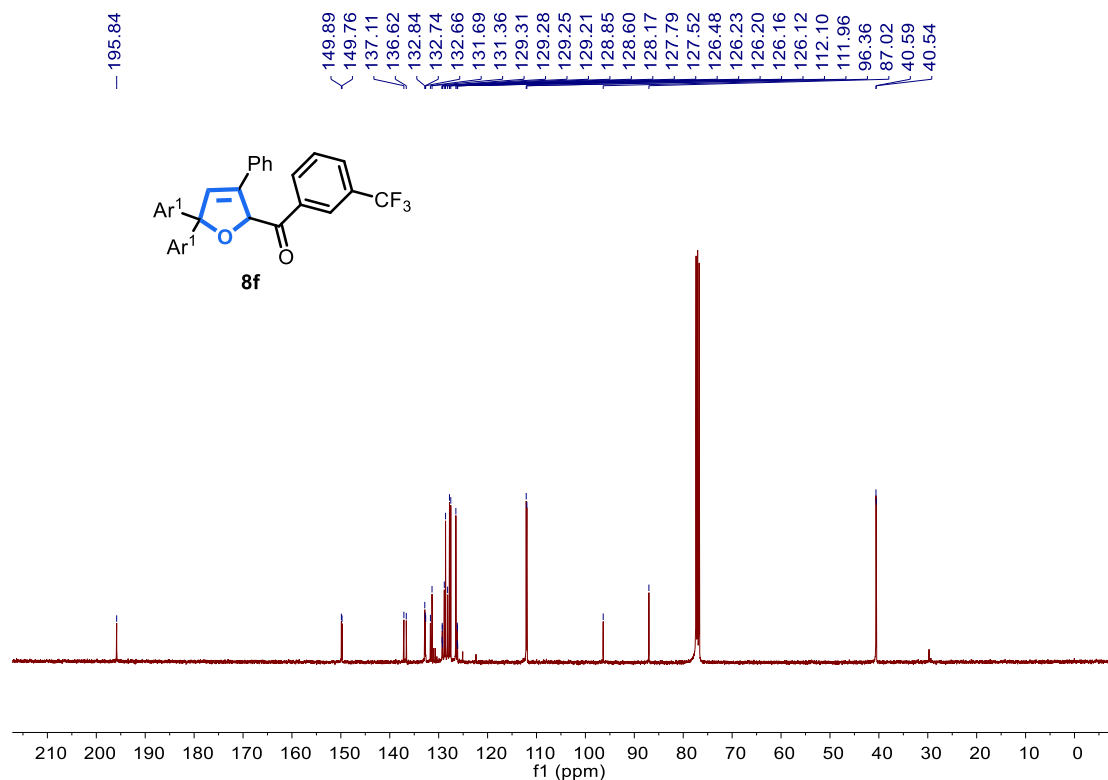

<sup>13</sup>C NMR Spectrum of Compound **8f** (100MHz, CDCl<sub>3</sub>)

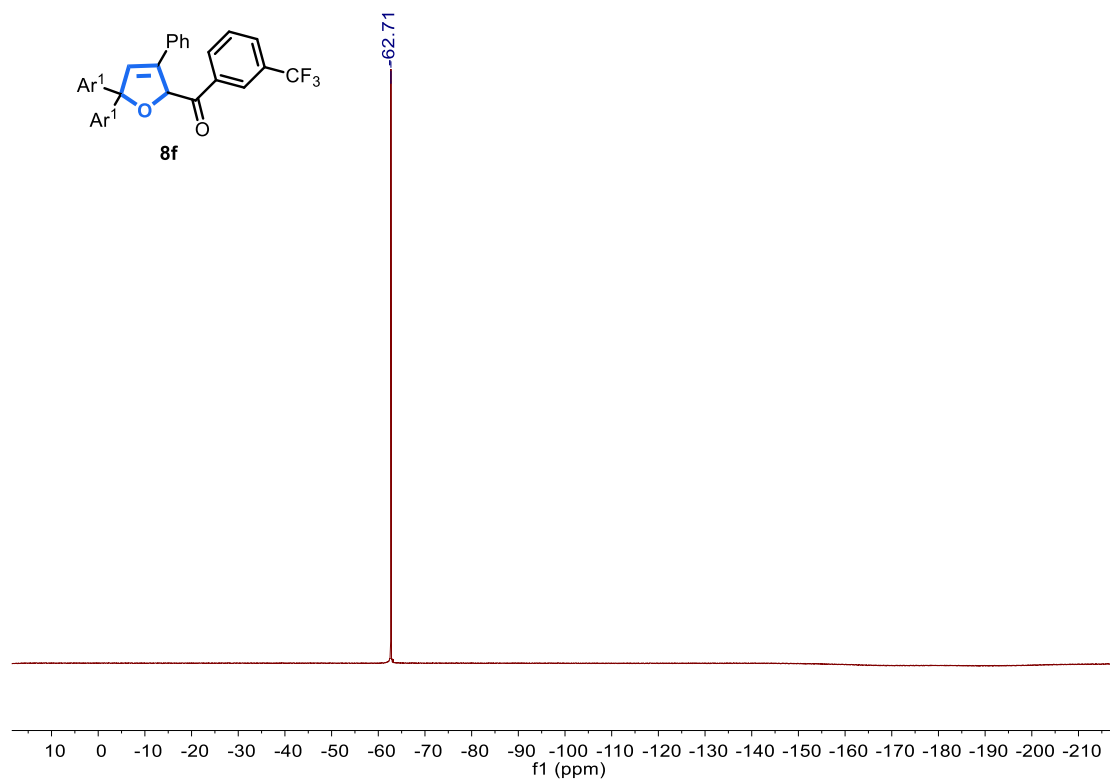

<sup>19</sup>F NMR Spectrum of Compound **8f** (376 MHz, CDCl<sub>3</sub>)

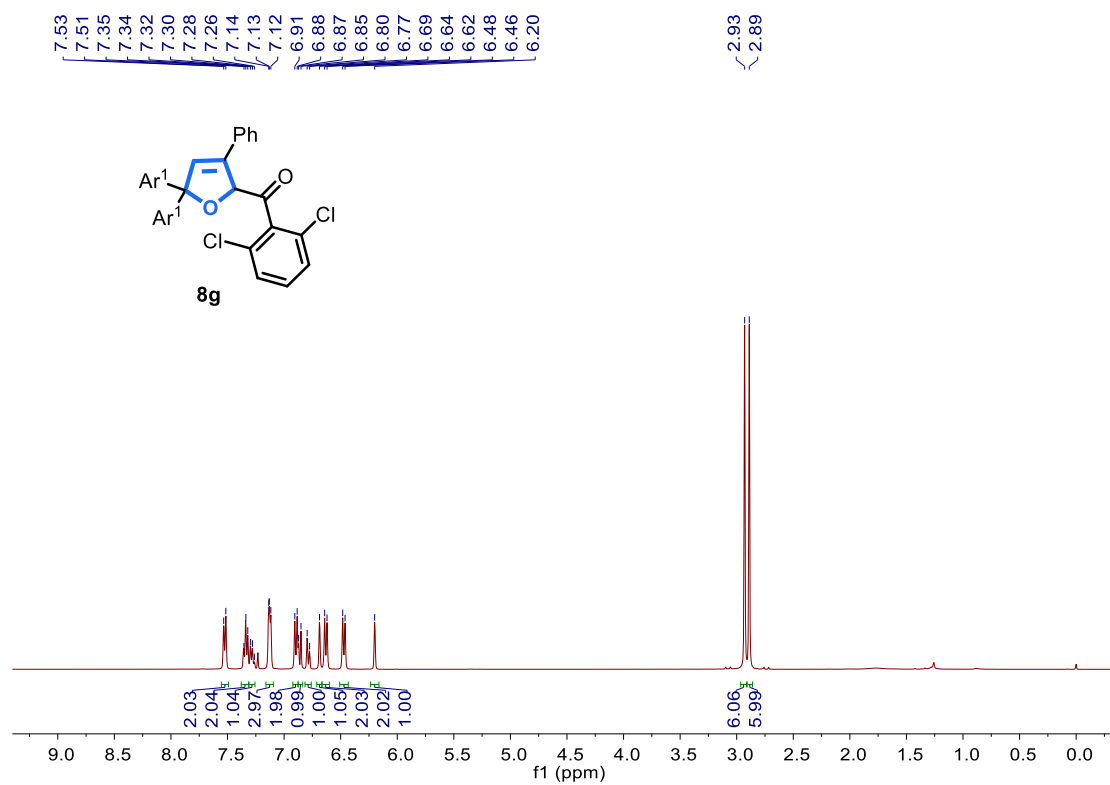

<sup>1</sup>H NMR Spectrum of Compound **8g** (400MHz, CDCl<sub>3</sub>)

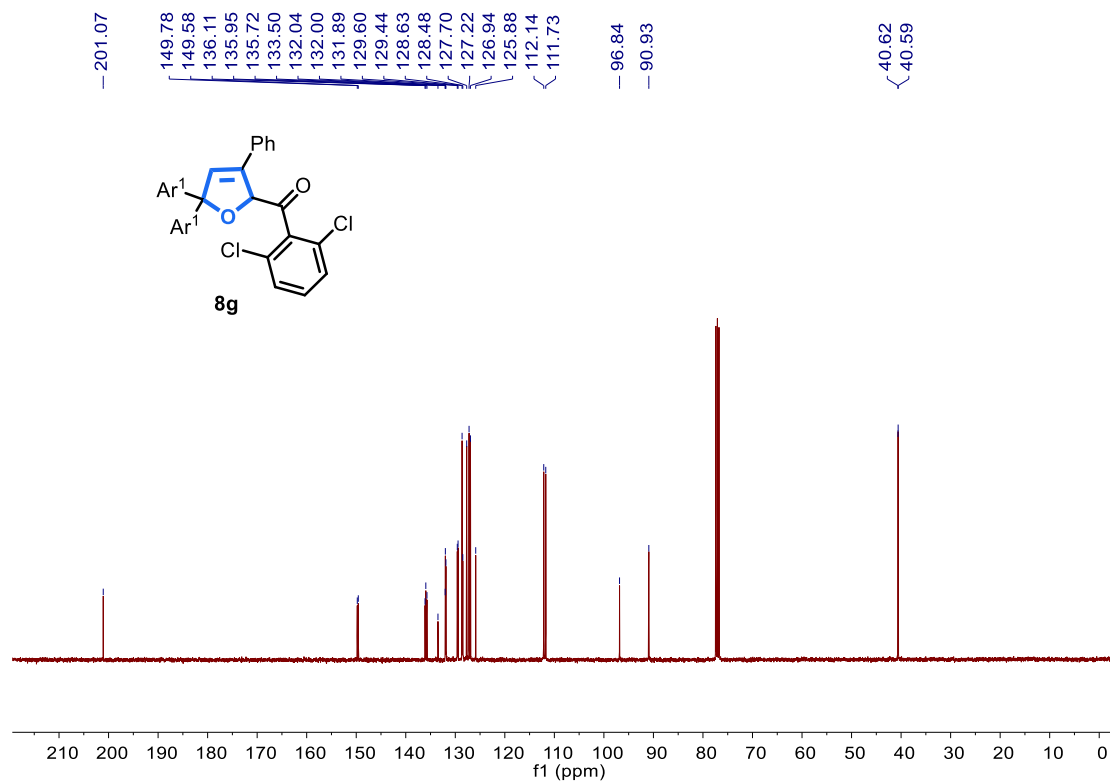

<sup>13</sup>C NMR Spectrum of Compound **8g** (100MHz, CDCl<sub>3</sub>)

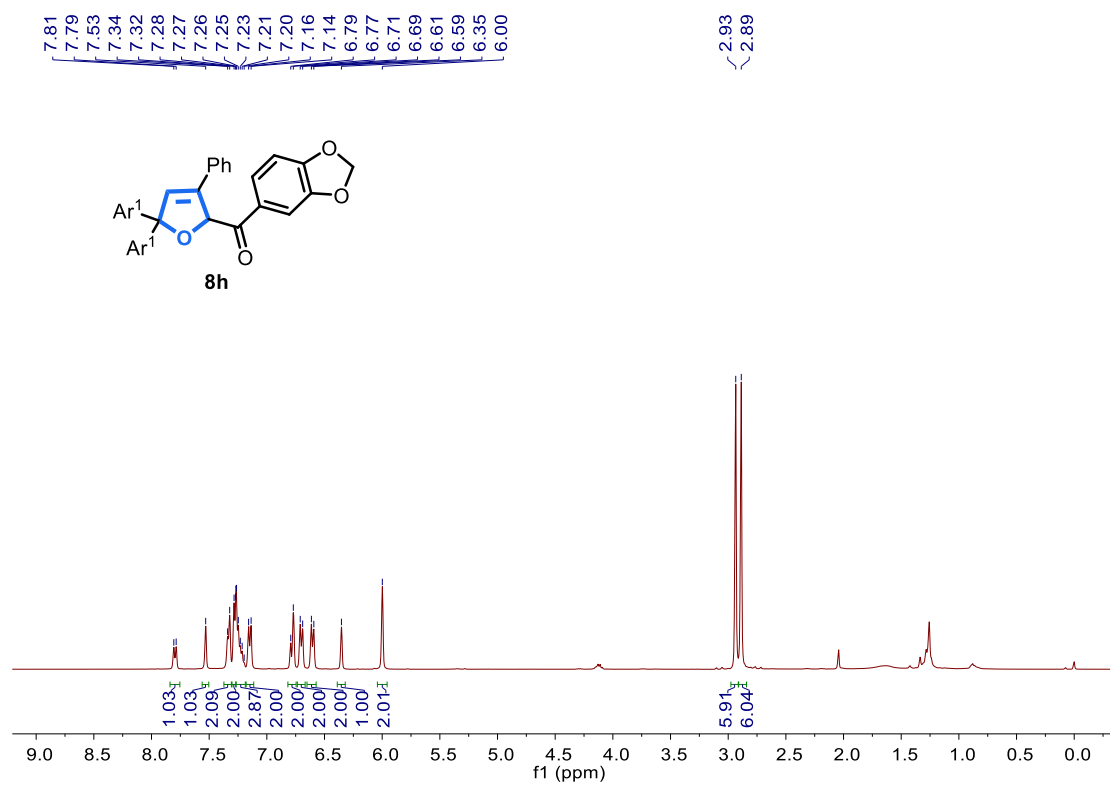

<sup>1</sup>H NMR Spectrum of Compound **8h** (400MHz, CDCl<sub>3</sub>)

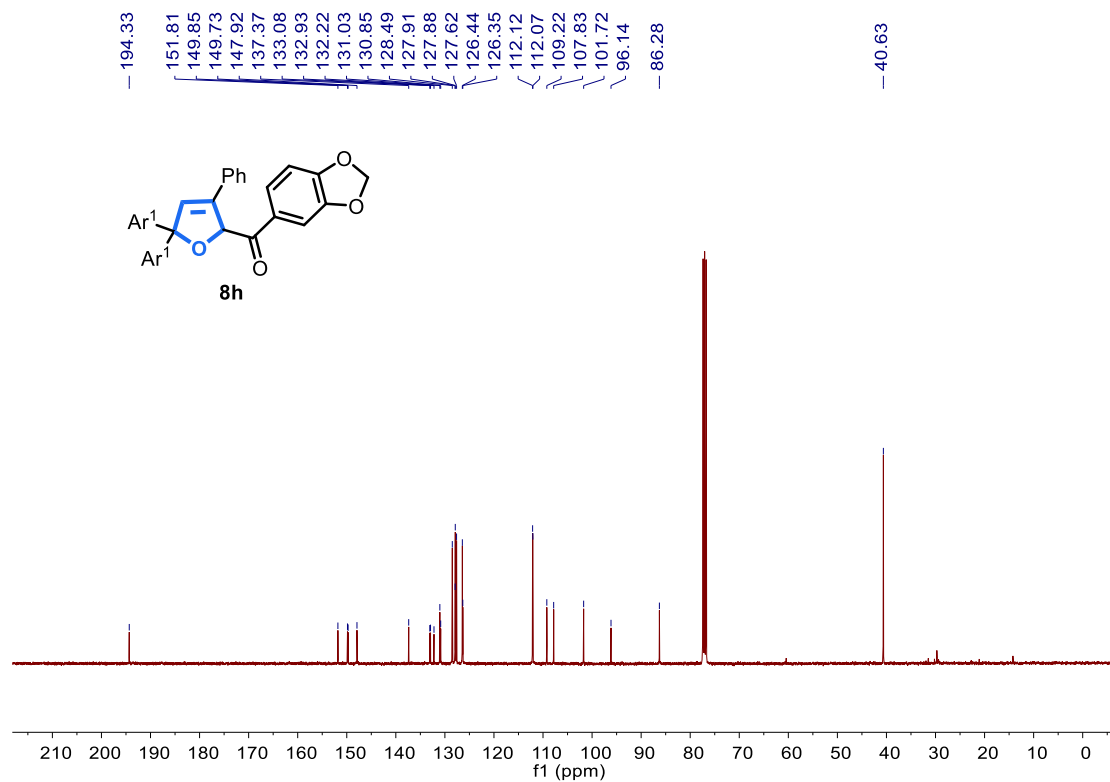

**13C NMR Spectrum of Compound 8h (100MHz, CDCl3)**

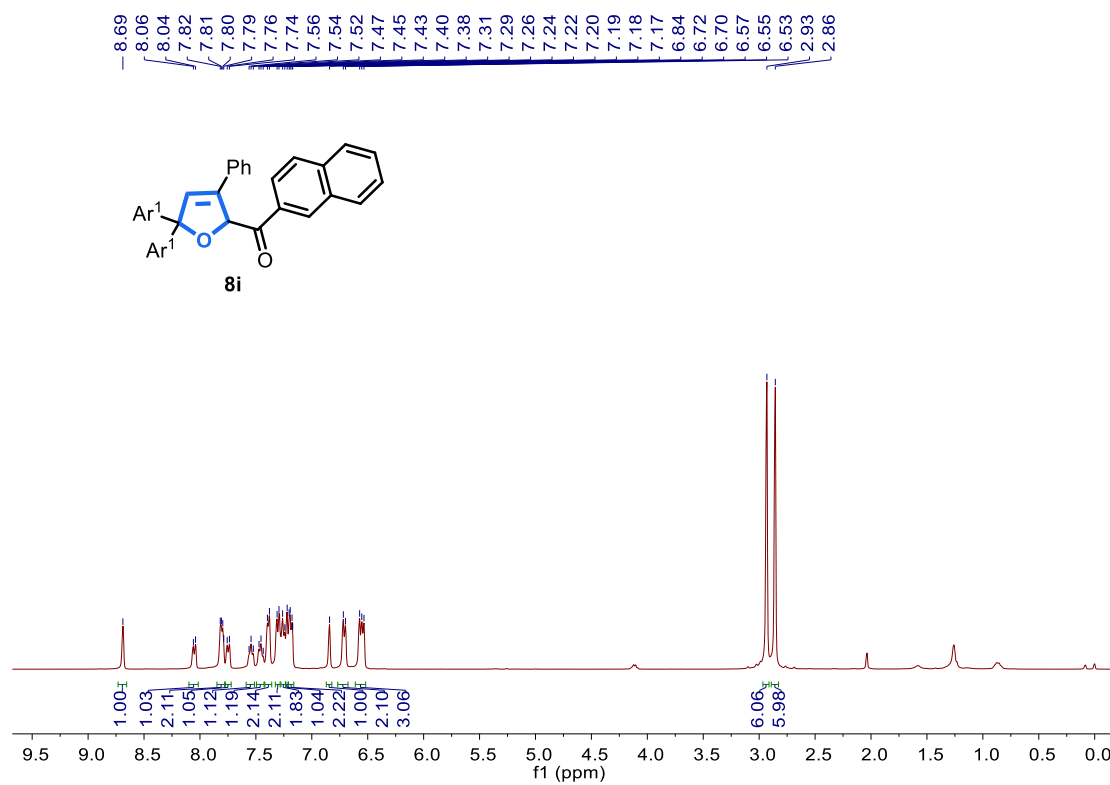

**1H NMR Spectrum of Compound 8i (400MHz, CDCl3)**

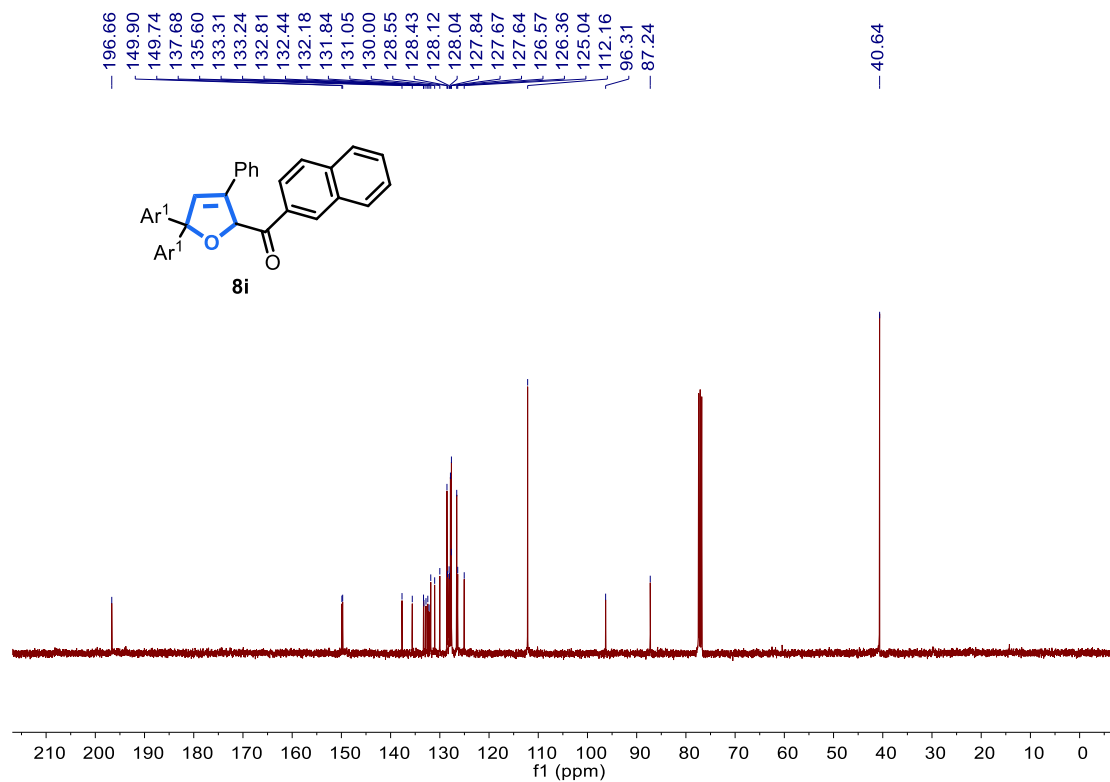

<sup>13</sup>C NMR Spectrum of Compound **8i** (100MHz, CDCl<sub>3</sub>)

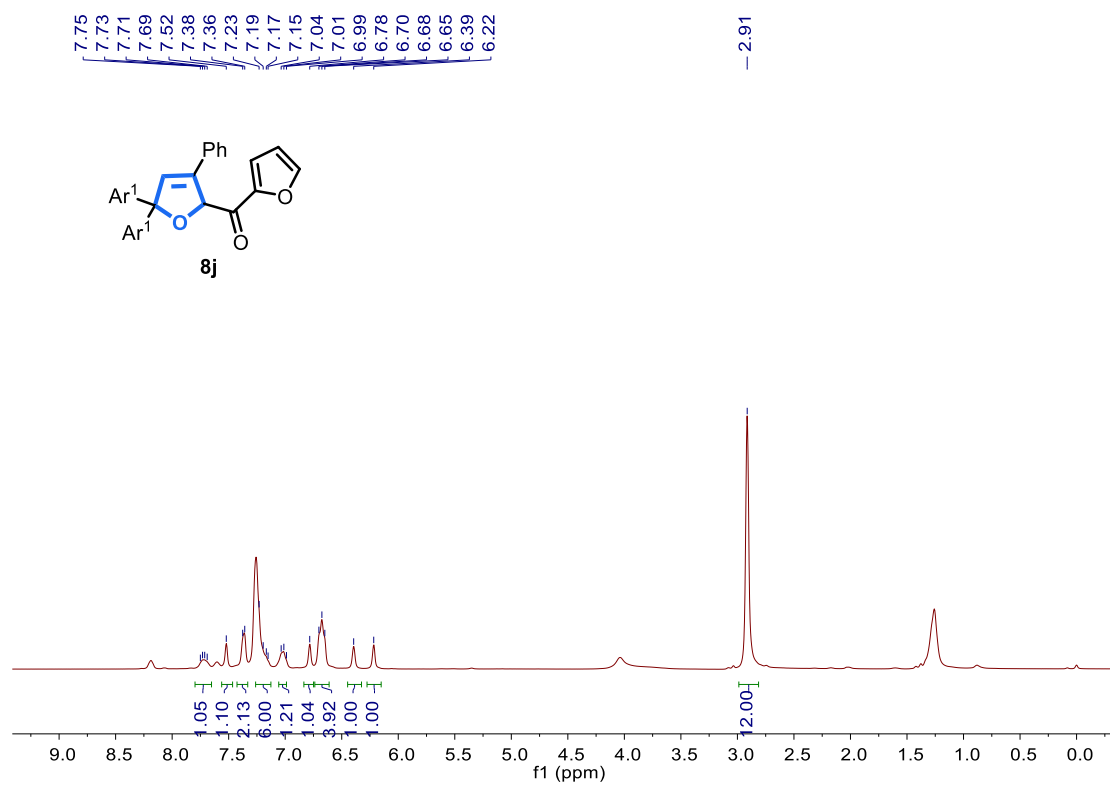

<sup>1</sup>H NMR Spectrum of Compound **8j** (400MHz, CDCl<sub>3</sub>)

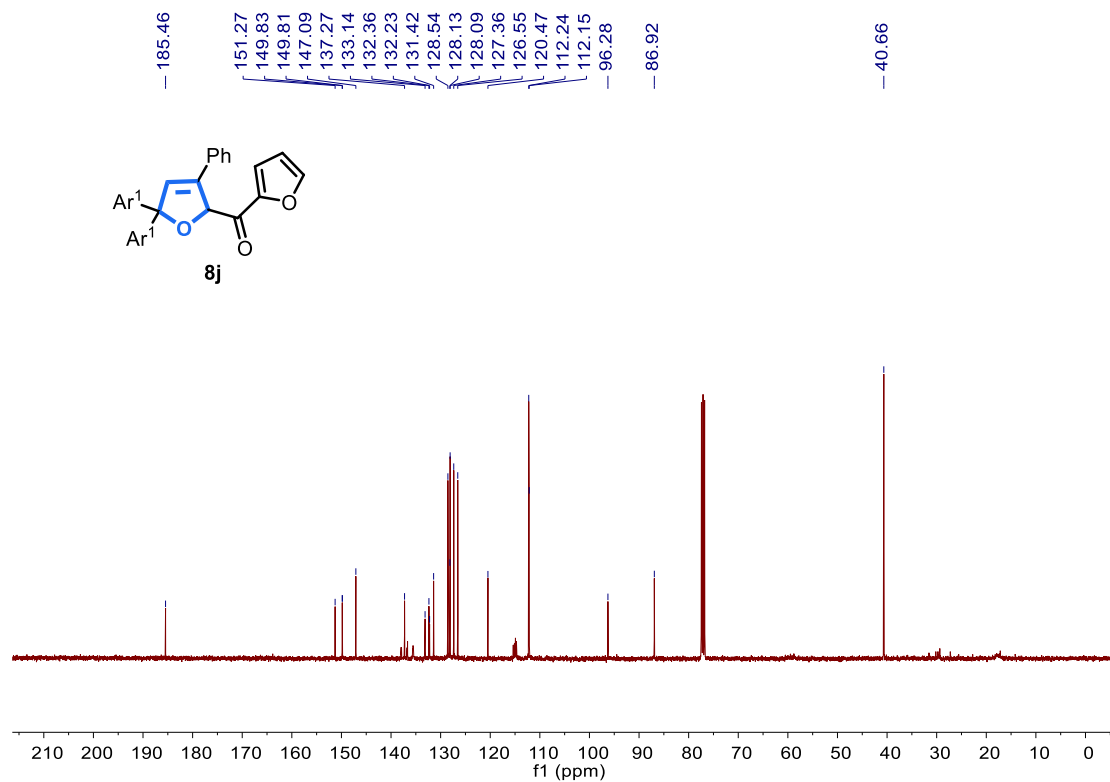

<sup>13</sup>C NMR Spectrum of Compound **8j** (100MHz, CDCl<sub>3</sub>)

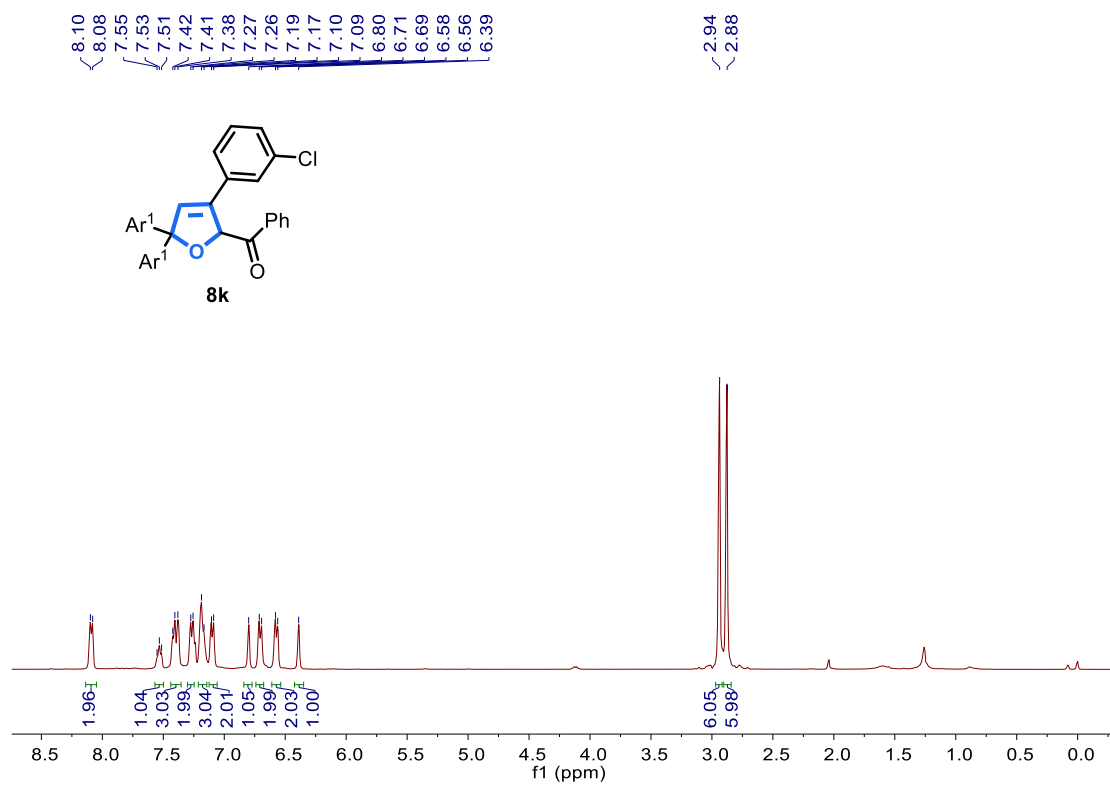

<sup>1</sup>H NMR Spectrum of Compound **8k** (400MHz, CDCl<sub>3</sub>)



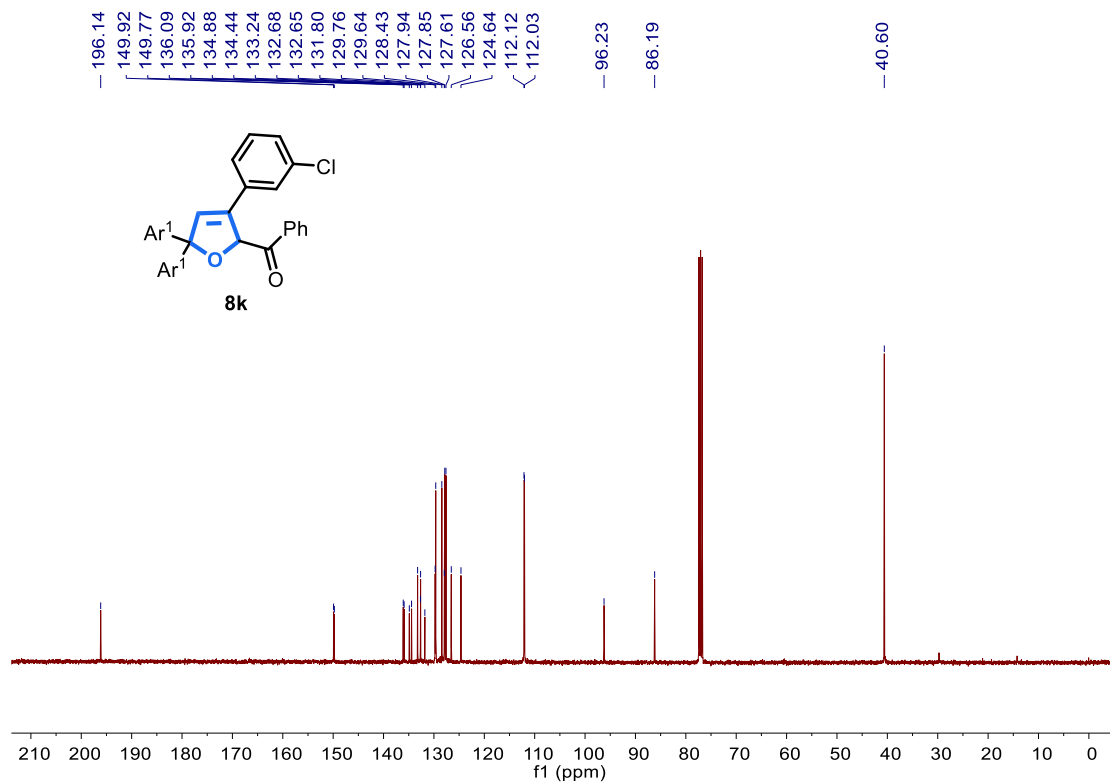

<sup>13</sup>C NMR Spectrum of Compound **8k** (100MHz, CDCl<sub>3</sub>)

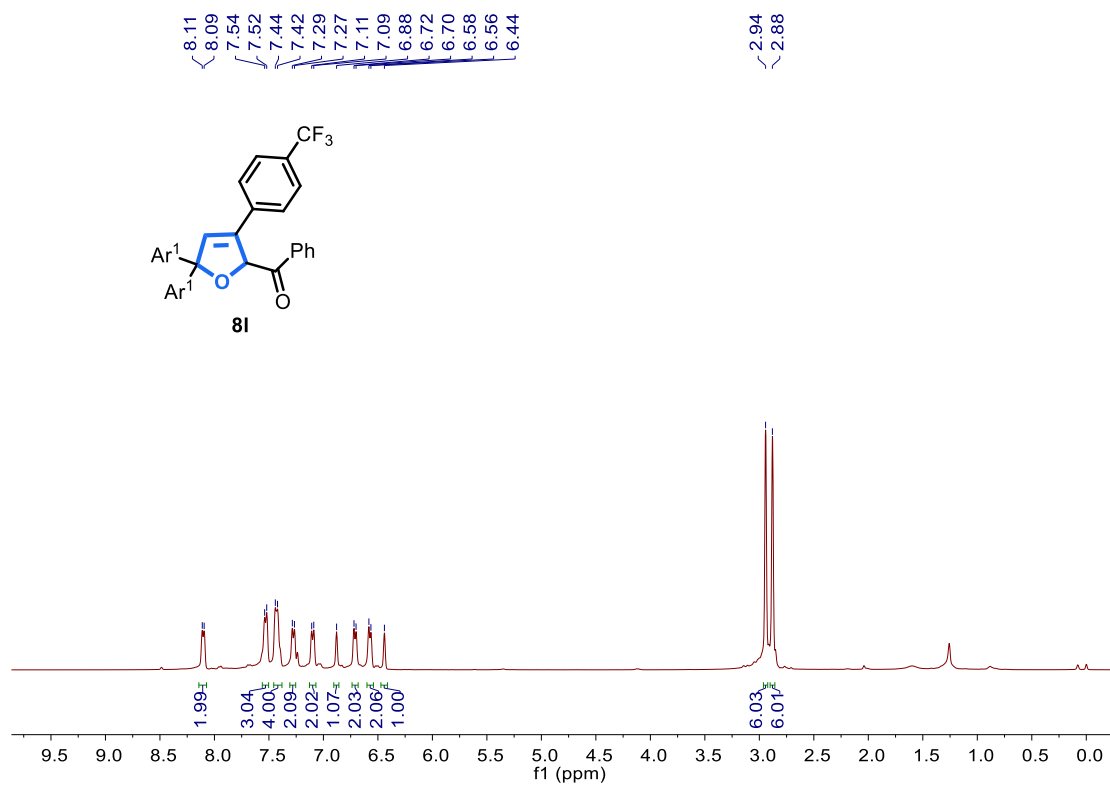

<sup>1</sup>H NMR Spectrum of Compound **8l** (400MHz, CDCl<sub>3</sub>)

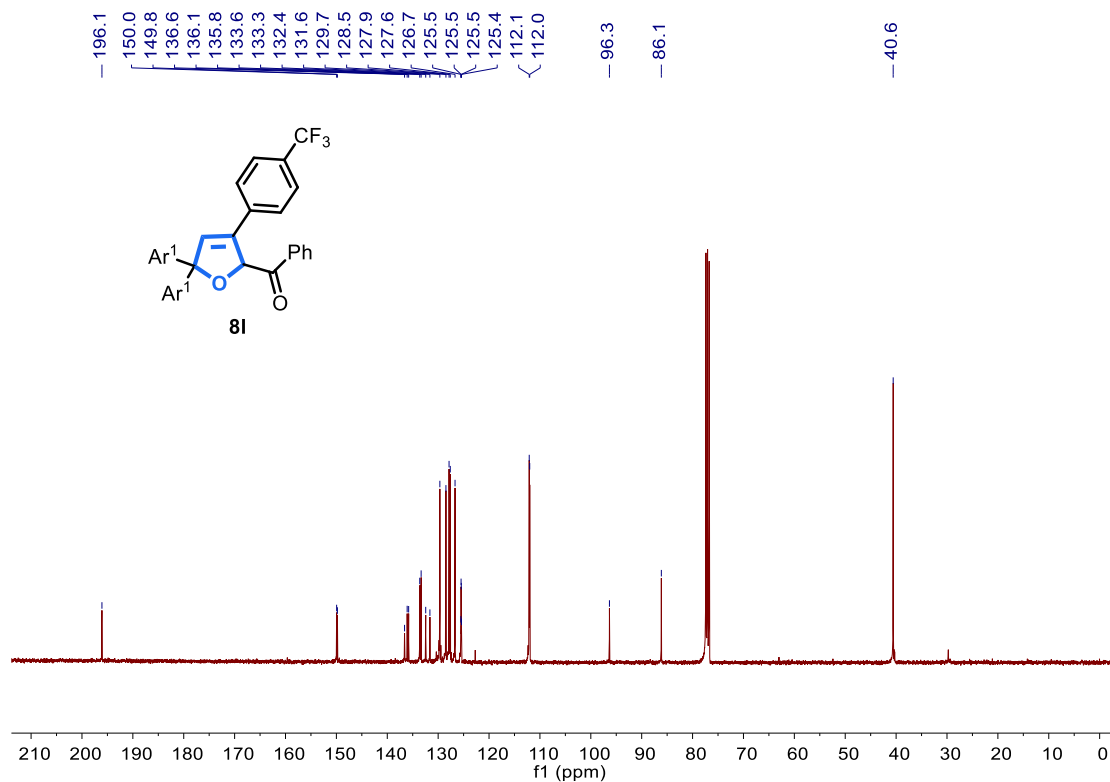

<sup>13</sup>C NMR Spectrum of Compound **81** (100MHz, CDCl<sub>3</sub>)

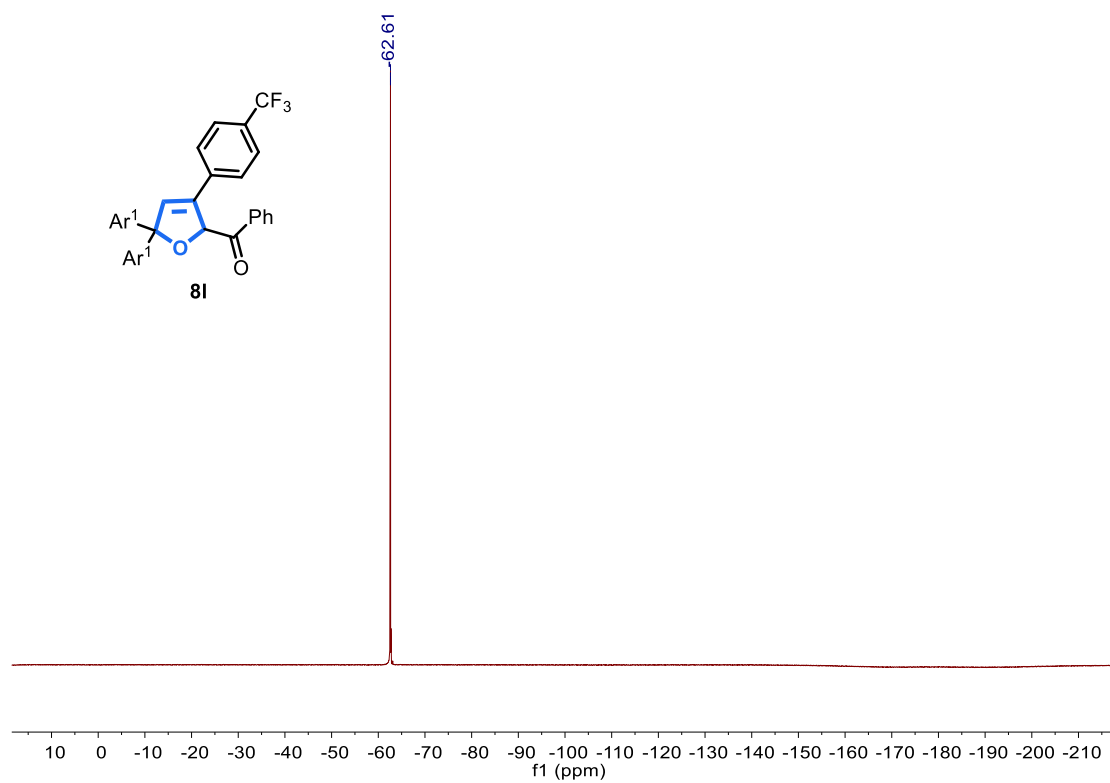

<sup>19</sup>F NMR Spectrum of Compound **81** (376 MHz, CDCl<sub>3</sub>)

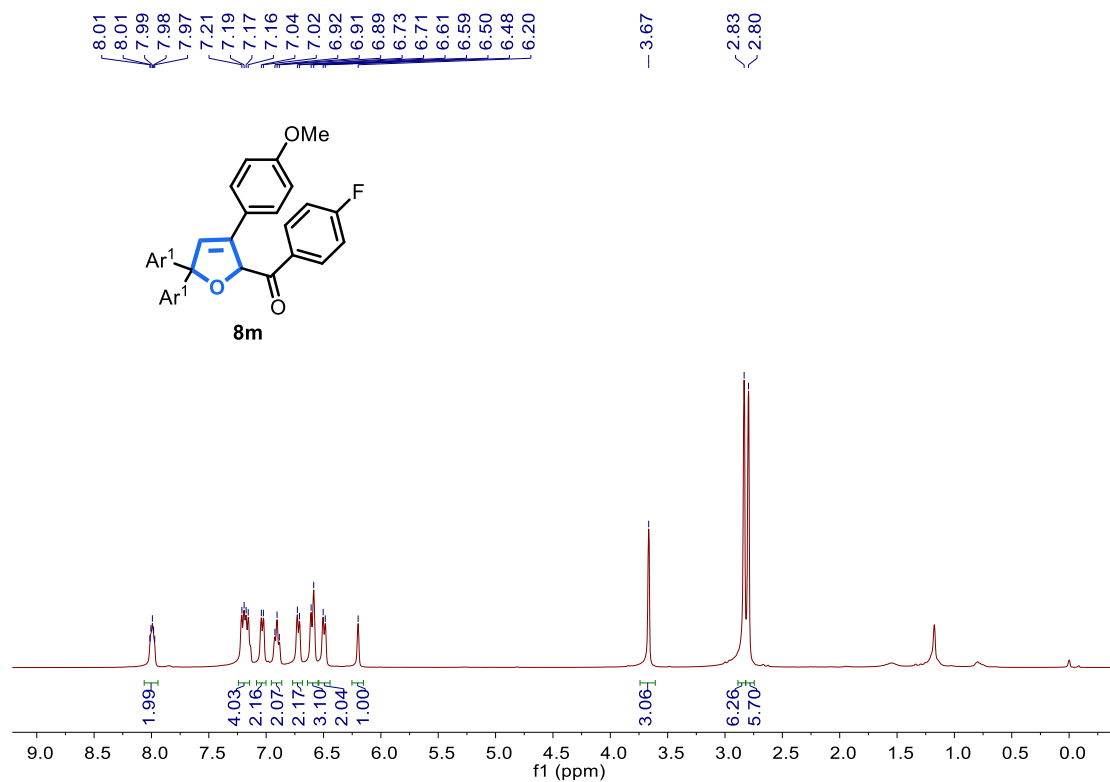

<sup>1</sup>H NMR Spectrum of Compound **8m** (400MHz, CDCl<sub>3</sub>)

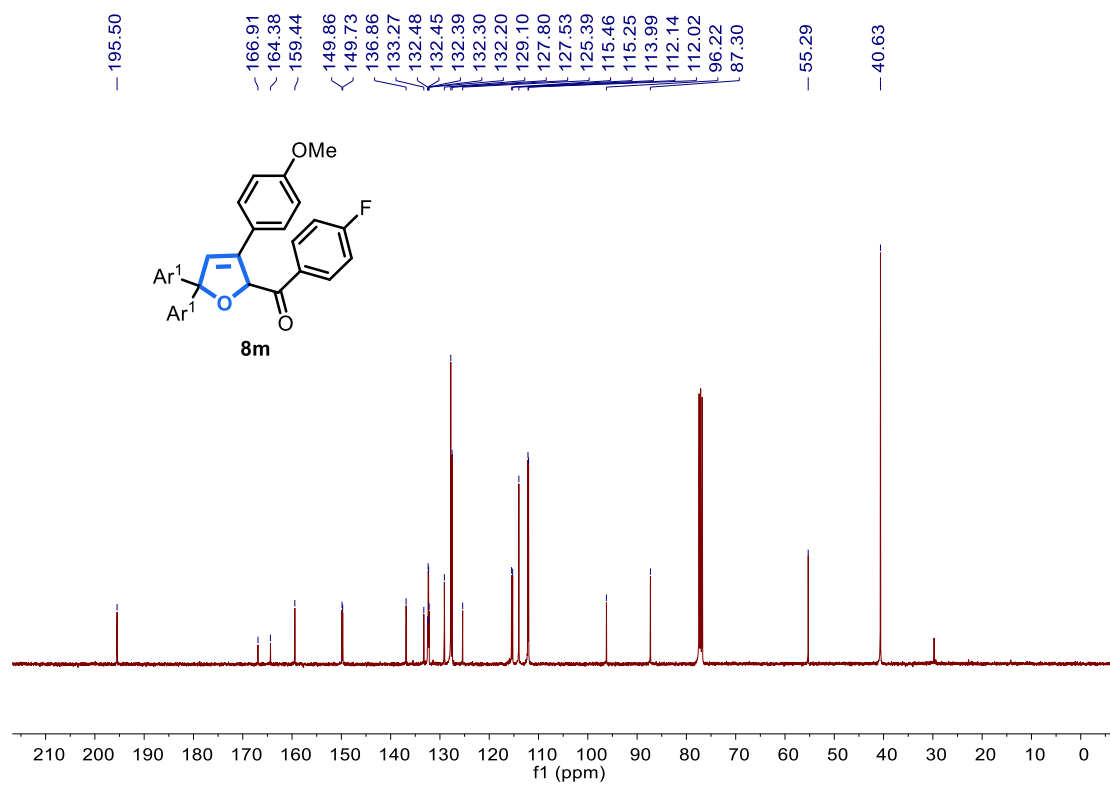

<sup>13</sup>C NMR Spectrum of Compound **8m** (100MHz, CDCl<sub>3</sub>)

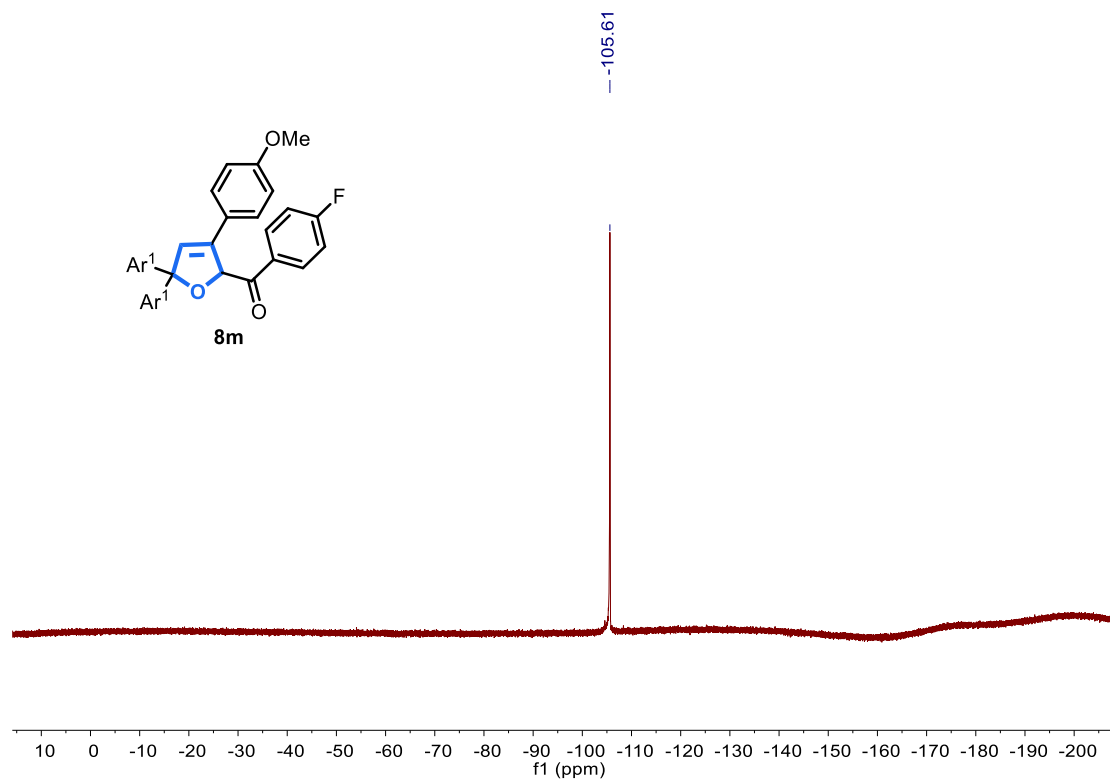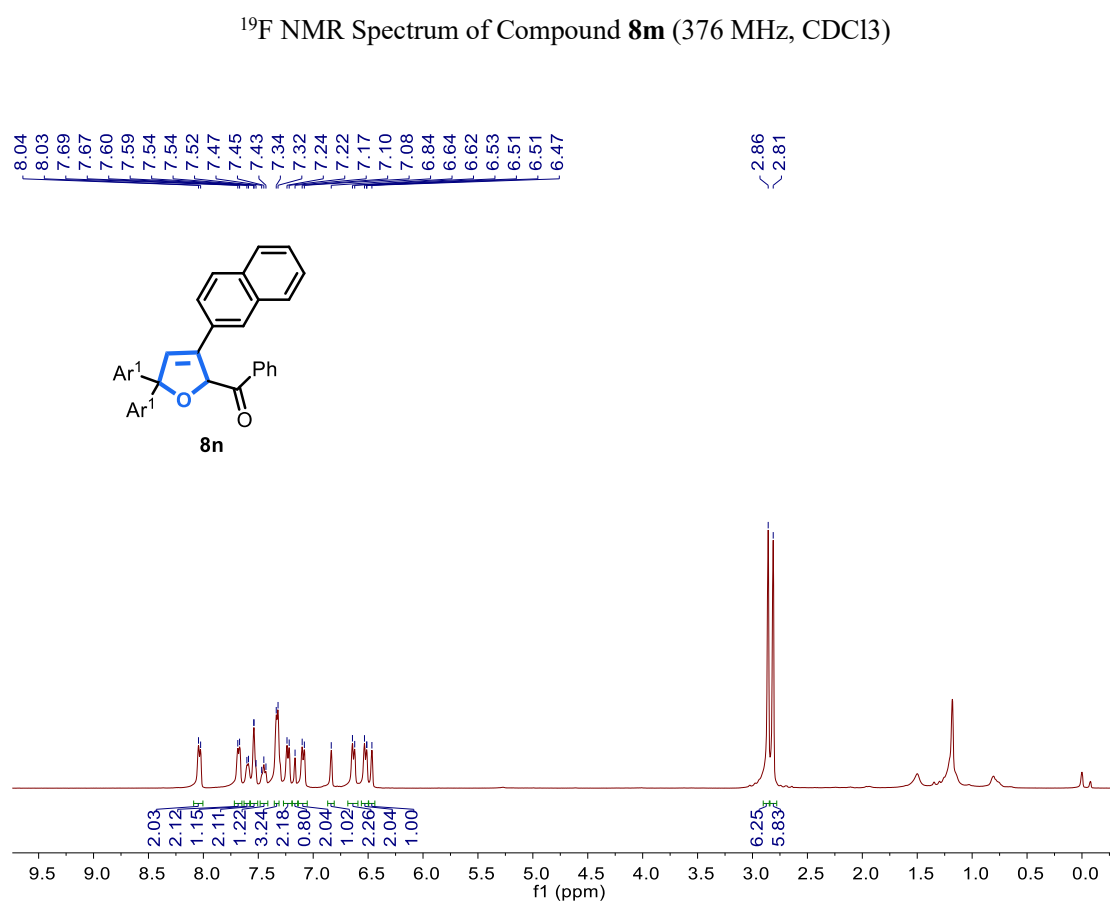

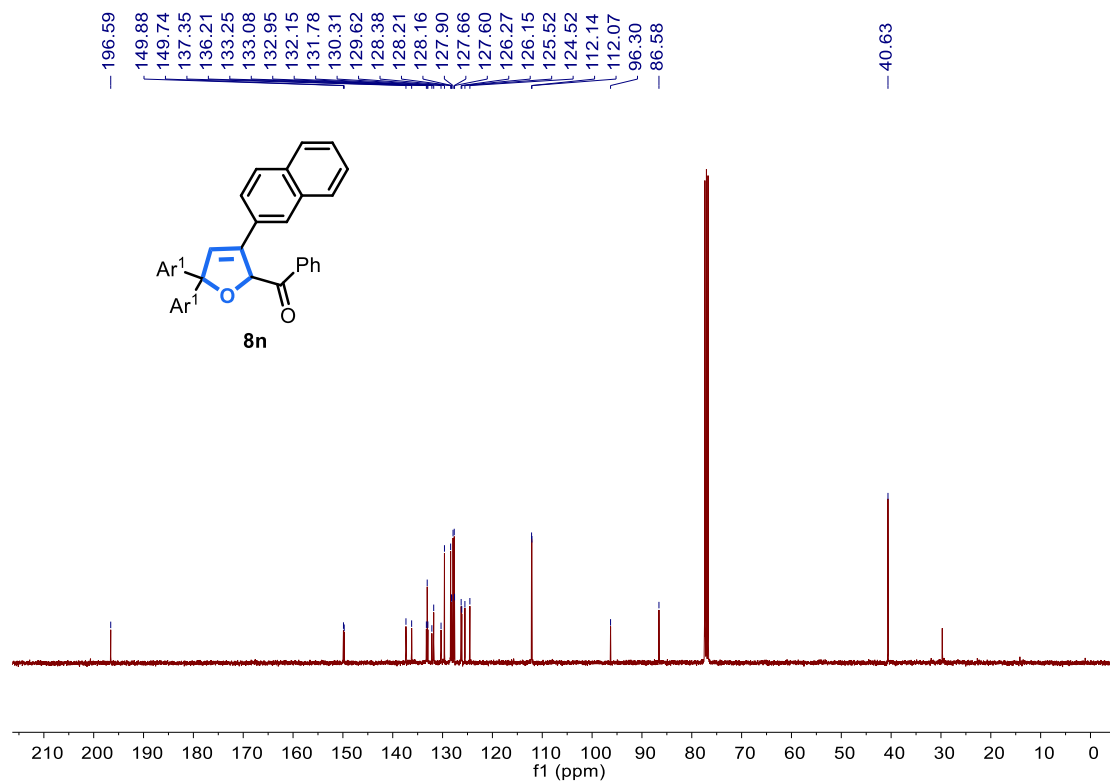

<sup>13</sup>C NMR Spectrum of Compound **8n** (100MHz, CDCl<sub>3</sub>)

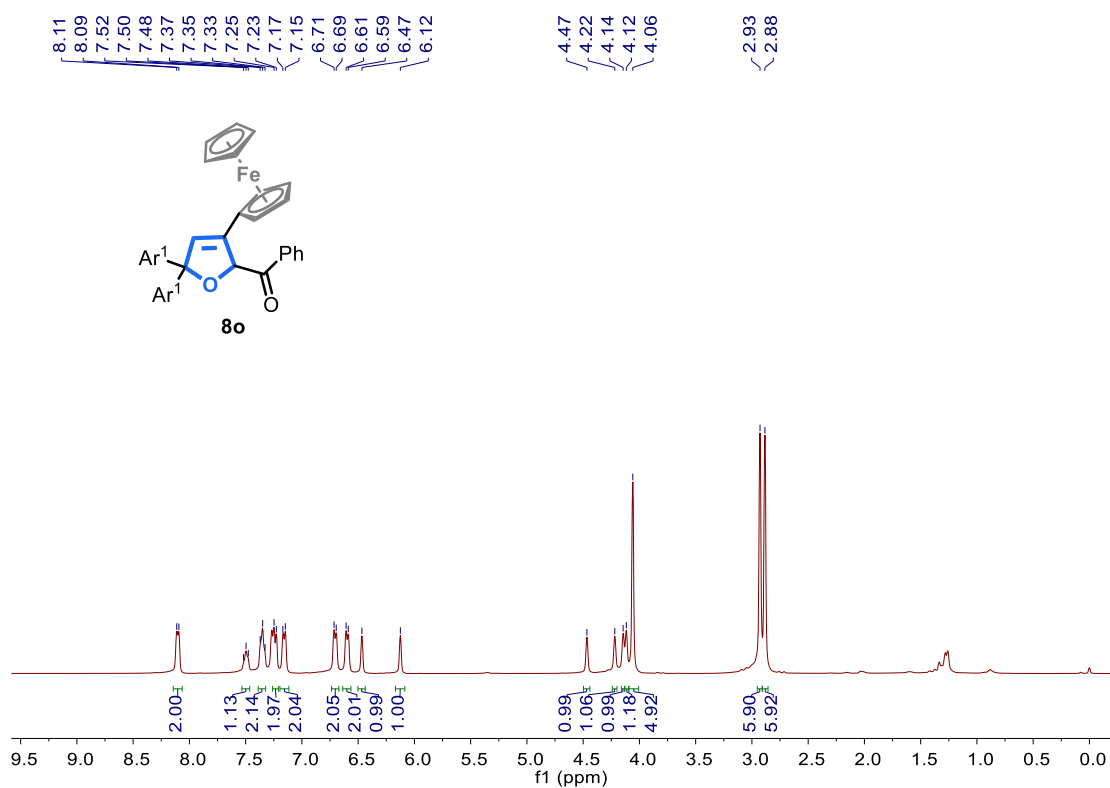

<sup>1</sup>H NMR Spectrum of Compound **8o** (400MHz, CDCl<sub>3</sub>)

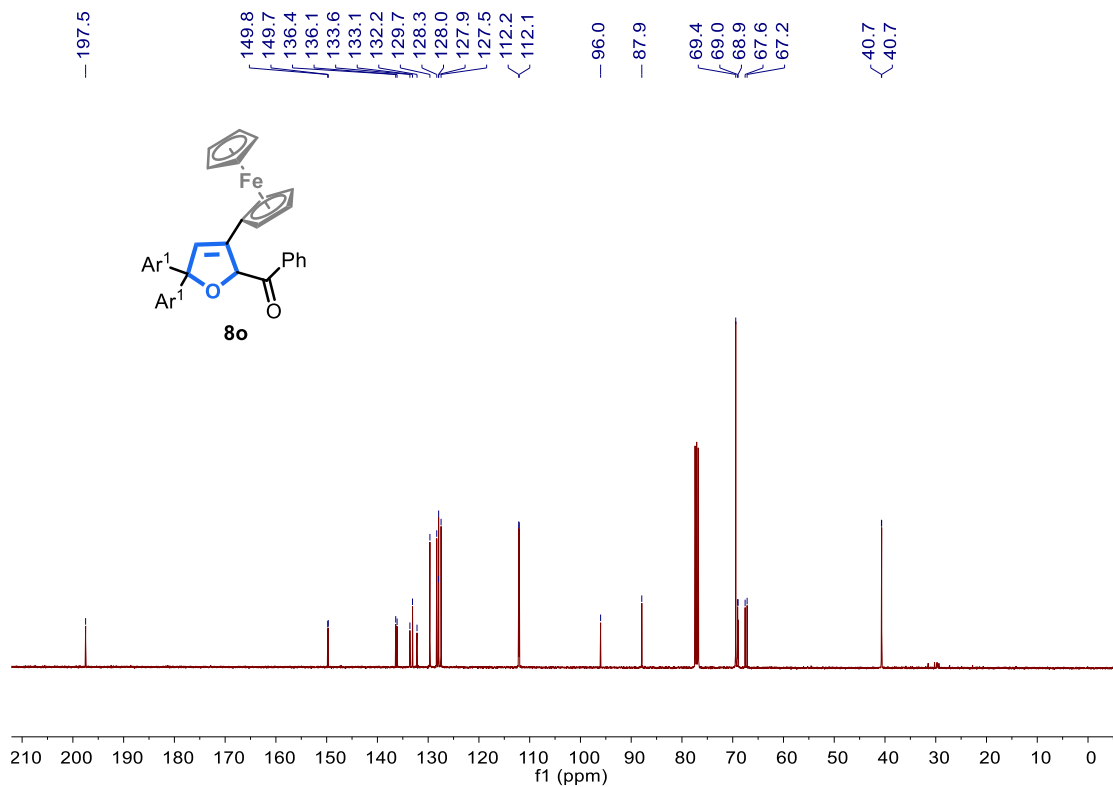

<sup>13</sup>C NMR Spectrum of Compound **8o** (100MHz, CDCl<sub>3</sub>)

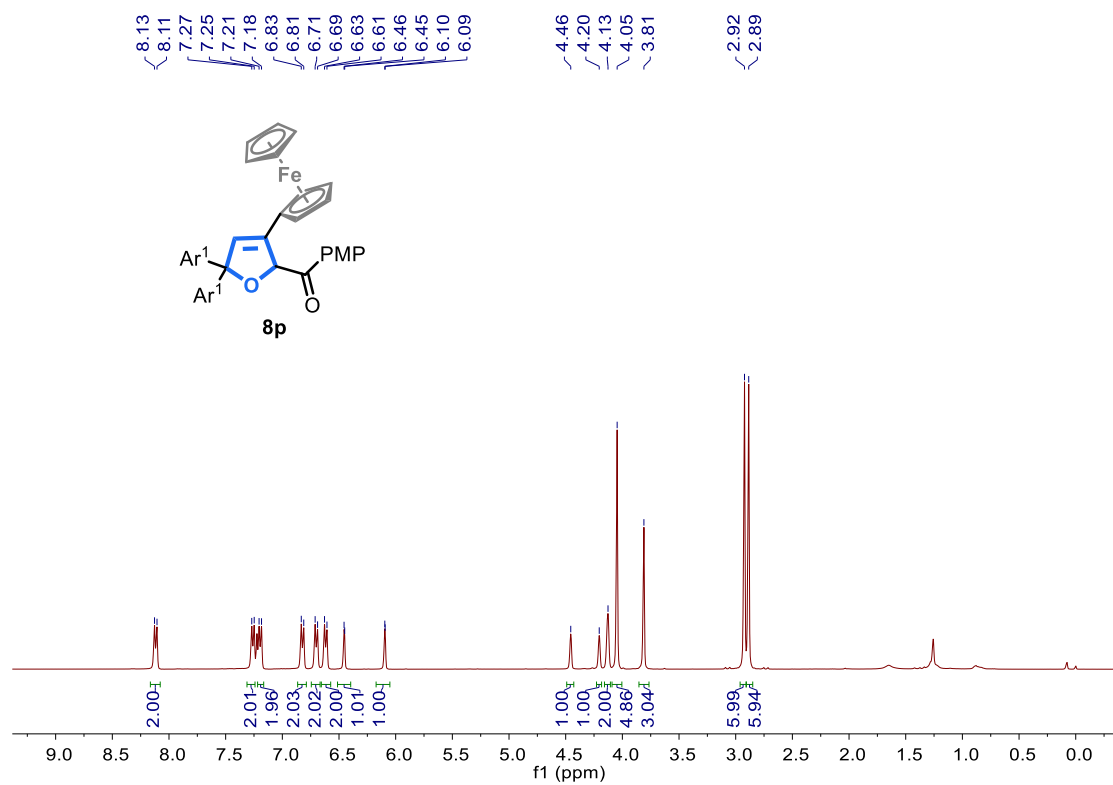

<sup>1</sup>H NMR Spectrum of Compound **8p** (400MHz, CDCl<sub>3</sub>)

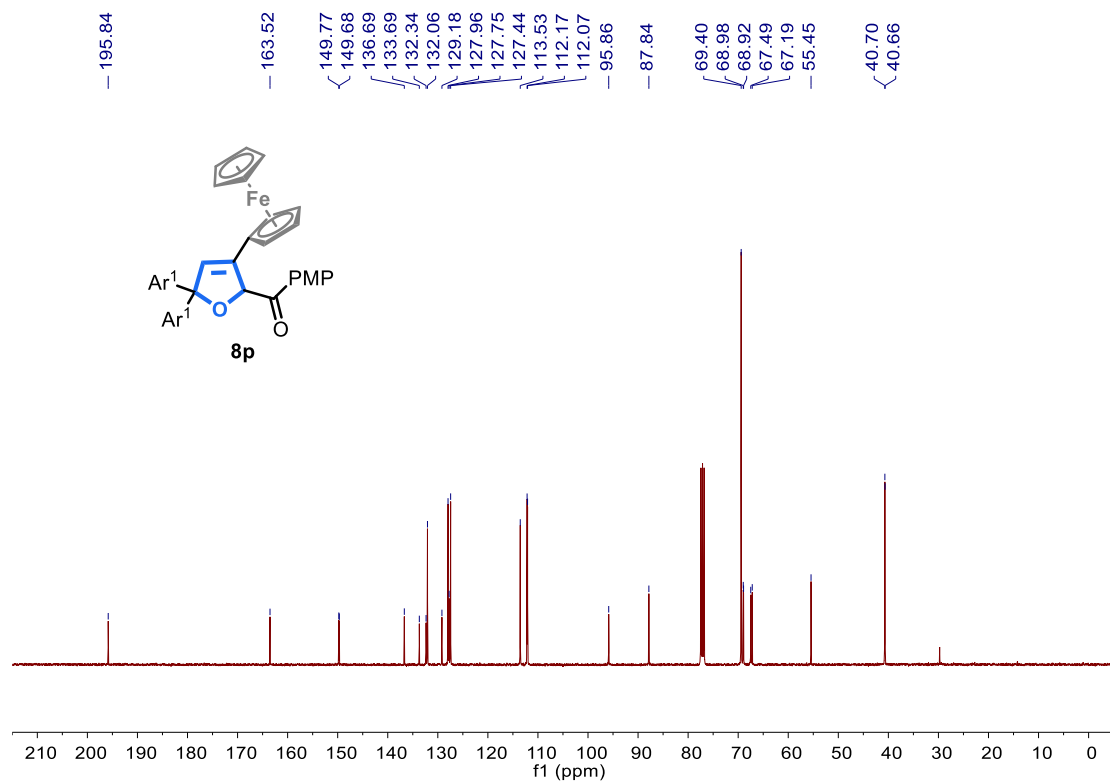

<sup>13</sup>C NMR Spectrum of Compound **8p** (100MHz, CDCl<sub>3</sub>)
